# Supplementary material for: Symptom burden in multimorbidity: a population-based combined questionnaire and registry study from Denmark
Source: PubMed Central journal article supplement — BMJ Open. 2021 Apr 13;11(4):e041877. doi: 10.1136/bmjopen-2020-041877 (PMC8051398; doi:10.1136/bmjopen-2020-041877), 2021-04-13
Supplement: bmjopen-2020-041877.draft_revisions.pdf [file bmjopen-2020-041877.draft_revisions.pdf]

# BMJ Open

BMJ Open is committed to open peer review. As part of this commitment we make the peer review history of every article we publish publicly available.

When an article is published we post the peer reviewers' comments and the authors' responses online. We also post the versions of the paper that were used during peer review. These are the versions that the peer review comments apply to.

The versions of the paper that follow are the versions that were submitted during the peer review process. They are not the versions of record or the final published versions. They should not be cited or distributed as the published version of this manuscript.

BMJ Open is an open access journal and the full, final, typeset and author-corrected version of record of the manuscript is available on our site with no access controls, subscription charges or pay-per-view fees (<http://bmjopen.bmj.com>).

If you have any questions on BMJ Open's open peer review process please email [info.bmjopen@bmj.com](mailto:info.bmjopen@bmj.com)

# BMJ Open

## Supra-additive symptom burden in multimorbidity. A combined population-based questionnaire- and registry study.

|                               |                                                                                                                                                                                                                                                                                                                                                                                                                                                                                                                                                                    |
|-------------------------------|--------------------------------------------------------------------------------------------------------------------------------------------------------------------------------------------------------------------------------------------------------------------------------------------------------------------------------------------------------------------------------------------------------------------------------------------------------------------------------------------------------------------------------------------------------------------|
| Journal:                      | <i>BMJ Open</i>                                                                                                                                                                                                                                                                                                                                                                                                                                                                                                                                                    |
| Manuscript ID                 | bmjopen-2020-041877                                                                                                                                                                                                                                                                                                                                                                                                                                                                                                                                                |
| Article Type:                 | Original research                                                                                                                                                                                                                                                                                                                                                                                                                                                                                                                                                  |
| Date Submitted by the Author: | 22-Jun-2020                                                                                                                                                                                                                                                                                                                                                                                                                                                                                                                                                        |
| Complete List of Authors:     | Willadsen, Tora; University of Copenhagen, Department of Public Health<br>Siersma, Volkert; University of Copenhagen, Department of Public Health<br>Nicolaisdottir, Dagny; University of Copenhagen, Department of Public Health<br>Jarbol, Dorte; University of Southern Denmark, The Research Unit for General Practice<br>Guassora, Ann; University of Copenhagen, Department of Public Health<br>Reventlow, Susanne; University of Copenhagen, Department of Public Health<br>Køster-Rasmussen, Rasmus; University of Copenhagen, Department of Public Health |
| Keywords:                     | EPIDEMIOLOGY, PRIMARY CARE, PUBLIC HEALTH                                                                                                                                                                                                                                                                                                                                                                                                                                                                                                                          |
|                               |                                                                                                                                                                                                                                                                                                                                                                                                                                                                                                                                                                    |

SCHOLARONE™  
Manuscripts

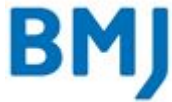

I, the Submitting Author has the right to grant and does grant on behalf of all authors of the Work (as defined in the below author licence), an exclusive licence and/or a non-exclusive licence for contributions from authors who are: i) UK Crown employees; ii) where BMJ has agreed a CC-BY licence shall apply, and/or iii) in accordance with the terms applicable for US Federal Government officers or employees acting as part of their official duties; on a worldwide, perpetual, irrevocable, royalty-free basis to BMJ Publishing Group Ltd ("BMJ") its licensees and where the relevant Journal is co-owned by BMJ to the co-owners of the Journal, to publish the Work in this journal and any other BMJ products and to exploit all rights, as set out in our [licence](#).

The Submitting Author accepts and understands that any supply made under these terms is made by BMJ to the Submitting Author unless you are acting as an employee on behalf of your employer or a postgraduate student of an affiliated institution which is paying any applicable article publishing charge ("APC") for Open Access articles. Where the Submitting Author wishes to make the Work available on an Open Access basis (and intends to pay the relevant APC), the terms of reuse of such Open Access shall be governed by a Creative Commons licence – details of these licences and which [Creative Commons](#) licence will apply to this Work are set out in our licence referred to above.

Other than as permitted in any relevant BMJ Author's Self Archiving Policies, I confirm this Work has not been accepted for publication elsewhere, is not being considered for publication elsewhere and does not duplicate material already published. I confirm all authors consent to publication of this Work and authorise the granting of this licence.

1  
2  
3  
4  
5  
6  
7  
8  
9  
10  
11  
12  
13  
14  
15  
16  
17  
18  
19  
20  
21  
22  
23  
24  
25  
26  
27  
28  
29  
30  
31  
32  
33  
34  
35  
36  
37  
38  
39  
40  
41  
42  
43  
44  
45  
46  
47  
48  
49  
50  
51  
52  
53  
54  
55  
56  
57  
58  
59  
60

## Supra-additive symptom burden in multimorbidity. A combined population-based questionnaire- and registry study.

Grauers Willadsen T<sup>1</sup>, Siersma V<sup>1</sup>, Rós Nicolaisdóttir D<sup>1</sup>, Jarbøl Ejl D<sup>2</sup>, Guassora AD<sup>1</sup>, Reventlow S<sup>1</sup> and Køster-Rasmussen R<sup>1</sup>

<sup>1</sup>The Research Unit for General Practice and Section of General Practice, Institute of Public Health, University of Copenhagen, Copenhagen, Denmark

<sup>2</sup>The Research Unit of General Practice, Department of Public Health, University of Southern Denmark, Odense, Denmark

**Corresponding author:** *Tora Grauers Willadsen, The Research Unit for General Practice, Department of Public Health, University of Copenhagen, Øster Farimagsgade 5, DK-1014, Post Box 2099, Copenhagen, Denmark. Email: tora.willadsen@sund.ku.dk*

Tables: 1

Figures: 4

Words: 2596

**Abstract (250 words)**

**Introduction:** Multimorbidity is associated with reduced quality of life. Patients with multimorbidity report high symptom burden and the symptoms, rather than the diagnoses, influence how patients rate their own health.

**Objective:** To explore symptom burden among people with different diagnoses and to explore how symptom burden is affected when diagnoses appear together vs. individually.

**Design:** A combined population-based questionnaire- and registry study.

**Participants:** In 2012, 47,452 participants from the Danish Symptom Cohort answered a questionnaire on symptom presence, interference with usual daily activities and concern of symptoms.

**Setting:** The Danish nationwide health registries were queried for these participants from 2002-2011 to see whether single diagnoses and multimorbidity occurred. Multimorbidity was defined as having diagnoses from at least two out of ten predefined groups of diagnoses. Multivariable models were used to estimate the association between symptom burden and diagnosis groups.

**Main outcome measure:** Symptom burden.

**Results:** Overall, 91.1% of the respondents reported one or more symptom(s) within the preceding four weeks, 36.3% of the study sample belonged to at least one diagnosis group and 11.9% had multimorbidity. Symptom burden was slightly higher for people with a diagnosis than for people not having the diagnosis in the registers. Mostly, symptom burden was increased for people with multimorbidity, and this increase was in excess of the sum of the increase attributable to the individual diagnosis groups.

**Conclusion:** Patients with multimorbidity reported higher symptom burden than the sum of burden from two persons with the individual diagnoses, indicating symptom burden being supra-additive in multimorbidity.

### Strengths and limitations of this study.

- This study combines high quality data from Danish national registries and questionnaire data from the background population.
- The questionnaire used in this study contains a width of symptoms indicative of both serious and harmless diseases.
- The results are adjusted for several potential confounders believed to be of importance.
- The selection of symptoms in the questionnaire is not exhaustive which may induce artificial differences between diagnoses groups. Nevertheless, this does not bias the synergy estimates.
- In this study, multimorbidity is defined based on groups of diagnoses, instead of as single diagnoses, why multimorbidity may have a relatively higher severity.

## Introduction

Multimorbidity, most often defined as the co-occurrence of two or more chronic diseases (1), affects mental health (2), quality of life (3), and survival (4), and patients with multimorbidity often struggle to manage their symptoms (5). Symptoms are central for how to rate own health (6), and factors like disability, duration, and feelings of vulnerability are important drivers for how a sensation gradually turns into a symptom (7), where interpretations of danger and intensiveness can be decisive for health care contact (8). Hence, symptoms are important for doctors to be able to make a diagnosis, and thereby the channel through which a person becomes a patient (9). However, symptoms can be difficult to explain, and doctors may stick to solely relieving symptoms (9, 10). Diagnoses, on the other hand, are not always helpful in explaining symptoms and experiences (11) and having diagnoses increases the risk of being diagnosed with other diseases (12). Patients with multimorbidity report considerable symptom burden (5, 13) and more focus on symptom management in multimorbidity has been suggested (14). In that light an understanding of the relation between diagnoses and symptom burden is warranted, especially an understanding of how symptom burden is experienced when diagnoses occur in multiples – as multimorbidity. The aim of this study was to explore how symptom burden is affected when diagnosis groups appear in combination (multimorbidity) compared to when they appear separately. We hypothesized that symptom burden in multimorbidity is additive i.e. that symptom burden in patients having multimorbidity is equivalent to the sum of symptom burden reported from two persons belonging to the diagnosis groups individually.

## Methods

### *Study design and population*

Participants were from the Danish Symptom Cohort (DaSK), a population-based study conducted in Denmark in June-December, 2012. People invited for the study lived in Denmark 1<sup>st</sup> January, 2012 (baseline). Of 100.000 persons randomly selected from the general Danish population aged 20 or older, 95.253 persons were eligible and invited (Figure 1). Of these, 49.706 (52.2%) answered the questionnaire (15).

All immigrated or live born individuals in Denmark receive a unique personal identification number stored in the Danish Civil Registration System (CRS) (16). CRS contains information on age, sex, vital status, etc., and CRS enables linking information from different Danish

registries. Information on diagnoses leading to either inpatient or outpatient care was collected from the Danish National Patient Register (NPR) (17), the Danish Cancer Registry (18), and the Danish Psychiatric Central Research Register (PCRR) (19). Information on education (20), work status (21), family income (22), assets (banks, stocks, bonds, and housing, within and outside Denmark) (22), degree of urbanization and cohabitation status derived from other nationwide registers stored in Statistics Denmark.

### *Symptoms and symptom burden*

The survey consisted of a web-based questionnaire, with the opportunity to have it filled in during a telephone interview, if warranted. The participants were guided through the questionnaire depending on the answers given. The process of developing the questionnaire has been described elsewhere (23). The questionnaire consists of five domains: three dealing with experience of symptoms and actions taken on them, and two dealing with factors related to symptom experience and health care-seeking behaviour (Supplementary File 1). The questionnaire includes 38 general symptoms, as well as two specific symptoms for men and four for women (44 symptoms in total). The questionnaire introduced with the following sentence: “We are interested to hear if you have experienced any bodily sensations, symptoms or discomfort within the last four weeks”. For the general symptoms the following phrase is used: ‘Have you within the last 4 weeks experienced any of these?’ with the opportunity to tick more than one box in a list presenting the 38 symptoms (Supplementary File 1). Additionally, questions about how the symptoms interferes with usual daily activities and concern about the symptoms are included: ‘Within the last 4 weeks: To what extent did you experience that the following symptoms or discomfort interfered with your usual daily activities?’ and ‘Within the last 4 weeks: To what extent were you concerned about the following symptoms or discomfort?’.

Since the six gender-specific symptoms are treated differently in the questionnaire and since the symptoms “coughing up blood” and “blood in vomit” have low prevalence in the data, eight symptoms are excluded from the present analyses. Therefore, 36 symptoms are included (Supplementary File 2).

Hence, in this study symptom burden consists of three parts; number of symptoms, interference of the symptoms with usual daily activities and concern about the symptoms, defined as follows: 1) number of symptoms (0-36), 2) the burden from the symptom with the



1  
2  
3 highest interference score (ranging 1-4 with 4 indicating the highest burden of interference  
4 with usual daily activities), and 3) the concern from the symptom with the highest concern  
5 score (ranging 1-4 with 4 indicating most concerns). The two latter definitions select the  
6 symptom causing most problems to acknowledge because it is anticipated that more  
7 burdensome symptoms affect quality of life more heavily than a number of minor symptoms  
8 (24).  
9

### 14 *Multimorbidity*

16 Information on diagnoses is retrieved from the nationwide health registries in the ten years  
17 period preceding baseline (1<sup>st</sup> January, 2002-31<sup>st</sup> December, 2011). Participants are excluded  
18 if they have not been living continuously in Denmark during this 10-year period.  
19

21 Multimorbidity is defined based on ten different groups of diagnoses: lung, musculoskeletal,  
22 endocrine, mental, cancer, neurological, gastrointestinal, cardiovascular, genitourinary and  
23 sensory. In each group several diagnoses, based on the International Classification of  
24 Diseases, 10<sup>th</sup> edition (ICD-10) are included (Supplementary File 3). According to this  
25 definition, to have multimorbidity, a patient must have a diagnosis from two or more different  
26 groups of diagnoses, which rests on the assumption that it is more complex from an  
27 organizational and physiological point of view if the patient suffers from diagnoses from  
28 different areas in the body (4). Often two chronic diagnoses refer to the same disease entity  
29 e.g. myocardial infarction and congestive heart failure. Therefore, this definition to a higher  
30 extent than counting single diagnoses can relate to the way health care is organized and grasp  
31 some aspects of complexity (Supplementary File 3).  
32  
33  
34  
35  
36  
37  
38  
39

41 Information on all variables used for adjustments (see statistical analysis) is obtained from  
42 the nationwide registries at baseline.  
43  
44

### 45 *Statistical analysis*

47 Excess symptom burden for persons having combinations of two diagnosis groups is assessed  
48 in multivariable linear regression models. For each of the three measures of symptom burden  
49 the  $(10 \times 9) / 2 = 45$  regression coefficients pertaining to the two-way interactions between  
50 diagnosis groups are retained from a multivariable linear regression on all combinations of  
51 diagnosis groups, adjusted for age, sex, socioeconomic status (highest completed education,  
52 income, assets, and work status), urbanization degree, cohabitation status, smoking and  
53 alcohol consumption. These coefficients are directly interpreted as the synergy effect, i.e.  
54 excess symptom burden associated with having diagnoses from both diagnosis groups  
55  
56  
57  
58  
59  
60

1  
2  
3 relative to the sum of the symptom burden associated with having a diagnose from the  
4 diagnosis groups individually. Analyses were performed using SAS, version 9.4 (SAS  
5 Institute Inc., Cary, NC, USA).  
6  
7

### 8 9 *Patient and public involvement*

10 No patients, or any other members of the public, were involved in designing, conducting, or  
11 reporting this study.  
12  
13

### 14 15 16 *Ethical approval*

17 The DaSK-study was approved by the Ethics Committee and the National Board of Health,  
18 and informed consent was obtained from all participants. Administrative register data were  
19 anonymized, why neither approval from the Ethics Committee, nor informed consent from  
20 the participants was needed. The use of register data was approved by the Danish Data  
21 Protection Agency, Statens Serum Institut and Statistics Denmark. Furthermore, the DaSK-  
22 study was approved by the Danish Data Protection Agency (journal number 2011-41-6651)  
23 and linkage between DaSK and registers was approved by the Danish Data Protection  
24 Agency (journal number 2015-231-0149).  
25  
26  
27  
28  
29  
30  
31  
32

### 33 **Results**

34 The study sample consisted of 47.452 persons aged  $\geq 20$  years (Figure 1) out of which 17.227  
35 (36.3%) belonged to at least one diagnosis group and 5.652 (11.9%) had multimorbidity.  
36 Overall, 43.228 (91.1%) reported symptoms (Supplementary File 4 and 5). Persons belonging  
37 to at least one diagnosis group reported symptoms more often than those not belonging to any  
38 of the diagnosis groups (92.8% vs. 90.2%), and the mean number of symptoms varied from  
39 4.8-7.4 across the sample (Table 1).  
40  
41  
42  
43  
44  
45  
46  
47  
48  
49  
50  
51  
52  
53  
54  
55  
56  
57  
58  
59  
60

**Table 1 Mean number of symptoms for each diagnosis groups with number of symptoms, interference with usual daily activities and concern of the symptoms.**

|                         | Number of symptoms<br>(mean number) | Interference with usual<br>daily activities (mean<br>score) <sup>□</sup> | Concern about<br>symptoms (mean<br>score) <sup>×</sup> |
|-------------------------|-------------------------------------|--------------------------------------------------------------------------|--------------------------------------------------------|
| <b>LUNG</b>             | 7.3                                 | 2.6                                                                      | 2.0                                                    |
| <b>MUSCULO-SKELETAL</b> | 6.0                                 | 2.3                                                                      | 1.7                                                    |
| <b>ENDO</b>             | 6.1                                 | 2.3                                                                      | 1.7                                                    |
| <b>MENTAL</b>           | 7.4                                 | 2.8                                                                      | 2.2                                                    |
| <b>CANCER</b>           | 5.6                                 | 2.1                                                                      | 1.5                                                    |
| <b>NEURO</b>            | 6.8                                 | 2.4                                                                      | 1.8                                                    |
| <b>GASTRO</b>           | 7.4                                 | 2.5                                                                      | 1.9                                                    |
| <b>HEART</b>            | 5.9                                 | 2.2                                                                      | 1.7                                                    |
| <b>KIDNEY</b>           | 7.3                                 | 2.5                                                                      | 1.9                                                    |
| <b>SENSORY</b>          | 5.5                                 | 2.1                                                                      | 1.3                                                    |
| <b>No diagnosis</b>     | 4.8                                 | 1.7                                                                      | 1.2                                                    |
| <b>Total</b>            | 5.2                                 | 1.9                                                                      | 1.3                                                    |

<sup>□</sup> Mean of the symptoms having highest interference on usual daily activities for each participant, asked in the questionnaire as: ‘within the last 4 weeks: to what extent did you experience that the following symptoms or discomfort interfered with your usual daily activities?’ with the following response categories: not at all, slightly, moderate, quite a bit, extremely. The response categories were transformed in to a numeric 4 digit scale where e.g. 4 is worse than 2.

<sup>×</sup> Mean of symptoms with the highest concern for each participant, asked in the questionnaire as: ‘within the last 4 weeks: to what extent were you concerned about the following symptoms or discomfort?’ with the following response categories: not at all, slightly, moderate, quite a bit, extremely. The response categories were transformed in to a numeric 4 digit scale where e.g. 4 is worse than 2.

LUNG = lung diagnoses, MUSCULOSKELETAL = musculoskeletal diagnoses, ENDO = endocrine diagnoses, MENTAL = mental diagnoses, CANCER = cancer diagnoses, NEURO = neurological diagnoses, GASTRO = gastrointestinal diagnoses, HEART = cardiovascular diagnoses, KIDNEY = genitourinary diagnoses, SENSORY = sensory organ diagnoses

1  
2  
3  
4  
5  
6  
7  
8  
9  
10  
11  
12  
13  
14  
15  
16  
17  
18  
19  
20  
21  
22  
23  
24  
25  
26  
27  
28  
29  
30  
31  
32  
33  
34  
35  
36  
37  
38  
39  
40  
41  
42  
43  
44  
45  
46  
47  
48  
49  
50  
51  
52  
53  
54  
55  
56  
57  
58  
59  
60

Multimorbidity combinations including heart, musculoskeletal or sensory diagnosis groups (as one of the two groups) were most prevalent (Figure 2-4). Persons belonging to the combinations lung-mental, kidney-gastro and mental-cancer reported the highest number of symptoms (Figure 2). The co-occurrence of two diagnosis groups in one person resulted generally in a higher number of reported symptoms than the sum of symptoms from two persons having the two diagnosis groups individually i.e. the number of reported symptoms in relation to multimorbidity was supra-additive as witnessed by the large amount of red halos in Figure 2. The lung-mental combination was most supra-additive, with approximately 5 symptoms more than the sum of the individual diagnosis groups (Figure 2). Only three combinations showed a discernable lower number of symptoms for the combination compared to the sum of the symptoms from the two diagnosis groups: lung-cancer, mental-neurological and cancer-kidney (Figure 2).

Persons belonging to the mental-sensory, mental-kidney, and the mental-musculoskeletal combinations reported a relatively high interference with daily activities (Figure 3). Almost all combinations were supra-additive, except for the cancer-kidney combination (Figure 3).

The combination mental-cancer and mental-kidney reported the most concerns about their symptoms, followed by mental-musculoskeletal (Figure 4). Furthermore, the majority of the combinations were supra-additive, highest for the mental-cancer combination. Only few combinations were infra-additive, with all combinations except one including the kidney group (Figure 4).

Median age of the participants in DaSK was 52 years (IQR 40-64) and 50 years (IQR 36-67) for non-participants. The non-participants were more often men, unmarried, had lower education, lower income level and generally had a looser attachment to the labour market (25).

## Discussion

### *Summary*

In this study, we explored the burden of symptoms in persons belonging to none, one and two (multimorbidity) different diagnosis groups in the Danish background population. We found that persons belonging to a diagnosis group had only slightly higher symptom burden than

1  
2  
3 persons not belonging to a diagnosis group. Furthermore, we found that symptom burden in  
4 multimorbidity in general is supra-additive i.e. the number of symptoms, interference with  
5 usual daily activities and concern about symptoms were higher for the combination of two  
6 diagnosis groups in one person than the sum of these measures in two persons belonging to  
7 one of the separate diagnosis groups.  
8  
9

### 10 11 12 13 *Strengths and limitations*

14  
15 The population-based cohort with high response rate is a strength (26), as well as the  
16 questionnaire containing a width of symptoms indicative of both serious and harmless  
17 diseases, and the adjustments for several important factors. The relatively low prevalence of  
18 multimorbidity in this study compared to other studies can be explained by the definition  
19 based on ten groups of diagnoses from secondary care (2, 27). The nationwide registers are  
20 highly valid, and because it requires a referral to secondary care to be included in the  
21 registers the diagnoses have certain seriousness (18, 17). In Denmark, primary care data on  
22 diagnoses are not available. However, we believe our broader definition, in contrast to simple  
23 disease counts (28, 29), better grasp the burden and complexity of multimorbidity.  
24  
25  
26  
27  
28  
29  
30

31  
32 The selection of symptoms in the questionnaire is not exhaustive and may show preference to  
33 certain diseases, e.g. there are many urinary tract related symptoms relative to only few  
34 kidney diagnoses. This may induce artificial differences between diagnoses groups. However,  
35 this does not bias the synergy estimates. Furthermore, the identification of the presence of  
36 diagnoses from secondary care contacts does not allow us to obtain adequate data on  
37 diagnosis duration which could be of importance for symptom experience (30). However, the  
38 time limit of four weeks in the questionnaire was used to focus on relevant symptoms, while  
39 they can still be recalled (15).  
40  
41  
42  
43  
44  
45  
46  
47

### 48 *Comparisons with existing literature*

49  
50 In this study, 92.8% of those belonging to a diagnosis group reported symptoms compared to  
51 90.2% among those not belonging to any of the groups. Since symptoms are a main source of  
52 information when a doctor establishes a diagnosis (9, 10) and symptoms are important  
53 mediators for health care seeking (31) the small difference between the groups was rather  
54 surprising and underline the unclear relation between symptoms and diagnoses. It also  
55 highlights the fact that symptoms to some degree are prerequisites of the human nature (7)  
56 apart from diagnoses that are created by humans (10).  
57  
58  
59  
60

1  
2  
3 Since one diagnosis will increase the probability for a second diagnosis, through increased  
4 contact with health care professionals (12), and these second diagnoses are tentatively found  
5 earlier in the natural course of the disease, we find the results in this study, with the majority  
6 of the multimorbidity combinations being supra-additive in relation to symptom burden,  
7 rather surprising. Maybe this may help us to understand why especially patients with  
8 multimorbidity struggle to recognize what symptoms to focus on (32). But also help us to  
9 understand, why patients with multimorbidity are overwhelmed by the symptom burden (5,  
10 13), experience complexity (2), organisational challenges (33), and demands from everyday  
11 life (34).  
12  
13  
14  
15  
16  
17  
18  
19

20 Participants having multimorbidity including a mental diagnosis generally reported high  
21 symptom burden and supra-additivity. For mental diagnoses both anxiety (35) and feelings of  
22 depression have been related to lower quality of life and low self-rated health (36) and  
23 depression can modify how self-rated health is affected by symptoms (6). Even though many  
24 of the mentioned symptoms deteriorate own ratings of health, evidence points to that it is not  
25 the symptom itself, rather limitations on daily activities, worries and treatment burden related  
26 to the symptom that affect patients most (34). Moreover, hypothetically some multimorbidity  
27 combinations can veil specific explanations e.g. mental-sensory may include patients not  
28 being offered or having received helping devices because of their underlying mental disease  
29 and many patients with chronic illness gradually become “problem patients” because of the  
30 demanding task to manage them optimally (37). Furthermore, patients with multimorbidity  
31 progressively lose confidence in their bodies and constantly have to scan the body for signs  
32 of worsening (38). In addition, patients with mental diagnoses like anxiety and depression  
33 may be more concerned about their symptoms and the signs of them. Finally, even though  
34 patients, especially in older age groups, adapt to chronic conditions as time passes (39), the  
35 high prevalence of multimorbidity also in the younger age groups (2) may be indicative for a  
36 lack of such an adaptation.  
37  
38  
39  
40  
41  
42  
43  
44  
45  
46  
47  
48  
49

50  
51 The relatively low rating of symptom burden for the cancer group was surprising, since  
52 cancer alarm symptoms are a mediator for doctor contact (31). However, in our definition of  
53 multimorbidity severity is not included, and for the cancer group, a low stage of the cancer  
54 and thereof a potential higher degree of radical treatment may be an explanation.  
55  
56  
57  
58 Furthermore, among patients with other chronic conditions in combination with cancer i.e.  
59  
60

1  
2  
3 multimorbidity, they describe an ended cancer treatment not being the focus of concern  
4 anymore (40).  
5  
6  
7

### 8 *Implications*

9  
10 Multimorbidity does not only consist of diagnoses and their medical consequences (28), but  
11 also, as shown by this study, of a considerable symptom burden embedded in the diagnosis  
12 coexistence itself. This, in combination with weak evidence of optimal symptom  
13 management among patients with multimorbidity (14), underlines the need for increased  
14 attention to symptom burden among patients with multimorbidity entering the health care  
15 system. In doing so, patient dairies, describing quality of disease management , attention to  
16 how patients explain illness in order to understand their stories and life themes (38), and  
17 patient involvement in deciding the agenda and achieving realistic goals (34), is probably  
18 valuable for optimal management.  
19  
20  
21  
22  
23  
24  
25

26  
27 In conclusion, patients with multimorbidity reported higher symptom burden than the sum of  
28 burden from to persons with the individual diagnoses, indicating symptom burden being  
29 supra-additive in multimorbidity.  
30  
31  
32

### 33 **Acknowledgements**

34  
35 The authors are deeply grateful to Niels de Fine Olivarius for his dedicated support in this  
36 work.  
37  
38  
39

40  
41 **Contributions** TGW designed, wrote and edited the manuscript, researched the data and  
42 contributed to the discussion. VS and DN performed the analyses, researched the data,  
43 contributed to the discussion and reviewed/edited the manuscript. RKR researched the data,  
44 contributed to the discussion and reviewed/edited the manuscript. ADG, DJ, SR made  
45 important contributions to the discussion and content, and reviewed/edited the manuscript.  
46 All authors approved the final version of the manuscript. TGW, VS and DN have full access  
47 to data and take full responsibility for the truthfulness in the data and in the data analyses.  
48  
49  
50  
51  
52  
53  
54  
55  
56  
57  
58  
59  
60

### 56 **Funding**

57  
58 The Health Foundation (Danish), grant number 19-B-0173.  
59  
60

1  
2  
3 **Disclaimer** The study sponsors had no role in study design, data collection, and analysis or in  
4 writing the manuscript.  
5  
6

7  
8 **Competing interests**  
9

10 None  
11  
12

13 **Patient consent for publication**  
14

15 Not required  
16  
17

18 **Data availability statement**  
19

20 Data may be obtained from a third party and are not publicly available. Data is stored at  
21 Statistics Denmark. To share data approvals are required from the Danish Data Protection  
22 Agency and The Danish Health Data Authority.  
23  
24  
25

26 **Copyright information**  
27

28 I, the Submitting Author has the right to grant and does grant on behalf of all authors of the  
29 Work (as defined in the below author licence), an exclusive licence and/or a non-exclusive  
30 licence for contributions from authors who are: i) UK Crown employees; ii) where BMJ has  
31 agreed a CC-BY licence shall apply, and/or iii) in accordance with the terms applicable for  
32 US Federal Government officers or employees acting as part of their official duties; on a  
33 worldwide, perpetual, irrevocable, royalty-free basis to BMJ Publishing Group Ltd (“BMJ”)  
34 its licensees and where the relevant Journal is co-owned by BMJ to the co-owners of the  
35 Journal, to publish the Work in Journal of Epidemiology & Community Health and any other  
36 BMJ products and to exploit all rights, as set out in our licence.  
37  
38  
39  
40  
41  
42  
43  
44  
45

46 The Submitting Author accepts and understands that any supply made under these terms is  
47 made by BMJ to the Submitting Author unless you are acting as an employee on behalf of  
48 your employer or a postgraduate student of an affiliated institution which is paying any  
49 applicable article publishing charge (“APC”) for Open Access articles. Where the Submitting  
50 Author wishes to make the Work available on an Open Access basis (and intends to pay the  
51 relevant APC), the terms of reuse of such Open Access shall be governed by a Creative  
52 Commons licence – details of these licences and which Creative Commons licence will apply  
53 to this Work are set out in our licence referred to above.  
54  
55  
56  
57  
58  
59  
60



1  
2  
3  
4  
5  
6  
7  
8  
9  
10  
11  
12  
13  
14  
15  
16  
17  
18  
19  
20  
21  
22  
23  
24  
25  
26  
27  
28  
29  
30  
31  
32  
33  
34  
35  
36  
37  
38  
39  
40  
41  
42  
43  
44  
45  
46  
47  
48  
49  
50  
51  
52  
53  
54  
55  
56  
57  
58  
59  
60

For peer review only

## References

1. van den Akker M BF, Knottnerus JA. Comorbidity or multimorbidity: what's in a name? A review of literature. *Eur J Gen Pract* 1996;2:65-70.
2. Barnett K, Mercer SW, Norbury M, et al. Epidemiology of multimorbidity and implications for health care, research, and medical education: a cross-sectional study. *Lancet* 2012;380(9836):37-43.
3. Fortin M, Lapointe L, Hudon C, et al. Multimorbidity and quality of life in primary care: a systematic review. *Health Qual Life Outcomes* 2004;2:51.
4. Willadsen TG, Siersma V, Nicolaisdottir DR, et al. Multimorbidity and mortality: A 15-year longitudinal registry-based nationwide Danish population study. *J Comorb* 2018;8(1):2235042x18804063.
5. Petrillo LA, Ritchie CS. The challenges of symptom management for patients with multimorbidity in research and practice: a thematic review. *Prog Palliat Care* 2016;24(5):262-7.
6. Nutzelt A, Dahlhaus A, Fuchs A, et al. Self-rated health in multimorbid older general practice patients: a cross-sectional study in Germany. *BMC Fam Pract* 2014;15:1.
7. Hay MC. Reading sensations: understanding the process of distinguishing 'fine' from 'sick'. *Transcult psychiatry* 2008;45(2):198-229.
8. Macleod U, Mitchell ED, Burgess C, et al. Risk factors for delayed presentation and referral of symptomatic cancer: evidence for common cancers. *Br J Cancer* 2009;101 Suppl 2:S92-S101.
9. Malterud K, Guassora AD, Graungaard AH, et al. Understanding medical symptoms: a conceptual review and analysis. *Theor Med Bioeth* 2015;36(6):411-24.
10. Peterson MC, Holbrook JH, Von Hales D, et al. Contributions of the history, physical examination, and laboratory investigation in making medical diagnoses. *West J Med* 1992;156(2):163-5.
11. Undeland M, Malterud K. The fibromyalgia diagnosis: hardly helpful for the patients? A qualitative focus group study. *Scand J Prim Health Care* 2007;25(4):250-5.
12. Berkson J. Limitations of the application of fourfold table analysis to hospital data. *Int J Epidemiol* 2014;43(2):511-5.
13. Eckerblad J, Theander K, Ekdahl AW, et al. Symptom trajectory and symptom burden in older people with multimorbidity, secondary outcome from the RCT AGe-FIT study. *J Adv Nurs* 2016;72(11):2773-83.
14. Ritchie CS. Symptom burden: in need of more attention and more evidence. *JAMA Intern Med* 2013;173(16):1541-2.
15. Rasmussen S, Sondergaard J, Larsen PV, et al. The Danish Symptom Cohort: Questionnaire and Feasibility in the Nationwide Study on Symptom Experience and Healthcare-Seeking among 100 000 Individuals. *Int J Family Med* 2014:187280.
16. Pedersen CB. The Danish Civil Registration System. *Scand J Public Health* 2011;39(7 Suppl):22-5.
17. Lyng E, Sandegaard JL, Rebolj M. The Danish National Patient Register. *Scand J Public Health* 2011;39(7 Suppl):30-3.
18. Gjerstorff ML. The Danish Cancer Registry. *Scand J Public Health* 2011;39(7 Suppl):42-5.

19. Mors O, Perto GP, Mortensen PB. The Danish Psychiatric Central Research Register. *Scand J Public Health* 2011;39(7 Suppl):54-7.
20. Jensen VM, Rasmussen AW. Danish Education Registers. *Scand J Public Health* 2011;39(7 Suppl):91-4.
21. Petersson F, Baadsgaard M, Thygesen LC. Danish registers on personal labour market affiliation. *Scand J Public Health* 2011;39(7 Suppl):95-8.
22. Baadsgaard M, Quitzau J. Danish registers on personal income and transfer payments. *Scand J Public Health* 2011;39(7 Suppl):103-5.
23. Rasmussen S, Sondergaard J, Larsen PV, et al. The Danish Symptom Cohort: Questionnaire and Feasibility in the Nationwide Study on Symptom Experience and Healthcare-Seeking among 100 000 Individuals. *Int J Family Med* 2014;2014:187280.
24. Elnegaard S, Pedersen AF, Sand Andersen R, et al. What triggers healthcare-seeking behaviour when experiencing a symptom? Results from a population-based survey. *BJGP Open* 2017;1(2).
25. Elnegaard S, Andersen RS, Pedersen AF, et al. Self-reported symptoms and healthcare seeking in the general population--exploring "The Symptom Iceberg". *BMC Public Health* 2015;15:685.
26. Galea S, Tracy M. Participation Rates in Epidemiologic Studies. *Ann Epidemiol* 2007;17(9):643-53.
27. Britt HC, Harrison CM, Miller GC, et al. Prevalence and patterns of multimorbidity in Australia. *Med J Aust* 2008;189(2):72-7.
28. Willadsen TG, Bebe A, Koster-Rasmussen R, et al. The role of diseases, risk factors and symptoms in the definition of multimorbidity - a systematic review. *Scand J Prim Health Care* 2016;34(2):112-21.
29. Diederichs C, Berger K, Bartels DB. The measurement of multiple chronic diseases--a systematic review on existing multimorbidity indices. *J Gerontol A Biol Sci Med Sci* 2011;66(3):301-11.
30. Eccles M, Ford GA, Duggan S, et al. Are postal questionnaire surveys of reported activity valid? An exploration using general practitioner management of hypertension in older people. *Br J Gen Pract* 1999;49(438):35-8.
31. Elliott AM, McAteer A, Hannaford PC. Revisiting the symptom iceberg in today's primary care: results from a UK population survey. *BMC Fam Pract* 2011;12:16.
32. Eckerblad J, Theander K, Ekdahl A, et al. Symptom burden in community-dwelling older people with multimorbidity: a cross-sectional study. *BMC Geriatr* 2015;15(1):1.
33. Bower P, Macdonald W, Harkness E, et al. Multimorbidity, service organization and clinical decision making in primary care: a qualitative study. *FamPract*. 2011;28(5):579-87.
34. Ortenblad L, Meillier L, Jonsson AR. Multi-morbidity: A patient perspective on navigating the health care system and everyday life. *Chronic Illn*. 2017;0(0):1-12.
35. Agborsangaya CB, Lau D, Lahtinen M, et al. Multimorbidity prevalence and patterns across socioeconomic determinants: a cross-sectional survey. *BMC Public Health* 2012;12:201.
36. Walke LM, Byers AL, Gallo WT, et al. The Association of Symptoms with Health Outcomes in Chronically Ill Adults. *J Pain Symptom Manage* 33(1):58-66.

- 1  
2  
3 37. Smith SM, O'Kelly S, O'Dowd T. GPs' and pharmacists' experiences of  
4 managing multimorbidity: a 'Pandora's box'. *Br J Gen Pract* 2010;60(576):285-  
5 94.  
6  
7 38. Kleinman. The Meaning of Symptoms and Disorders and The Personal and  
8 Social Meanings of Illness (Chapter 1 and 2). In: *The Illness Narratives:  
9 Suffering, Healing and the Human Condition United States of America: Basic  
10 Books* 1988:3-55.  
11  
12 39. Leinonen R, Heikkinen E, Jylha M. Changes in health, functional performance  
13 and activity predict changes in self-rated health: a 10-year follow-up study in  
14 older people. *Arch Gerontol Geriatr* 2002;35(1):79-92.  
15  
16 40. Arreskov AB, Graungaard AH, Kristensen MT, et al. Life goes on... Patient  
17 perspectives on having a cancer diagnosis and other comorbid diseases: A  
18 qualitative study. *Chronic Illn* 2018:1742395318815954.  
19  
20  
21  
22  
23  
24  
25  
26

#### Figure legends

27  
28  
29 **Figure 1.** Study population.

30  
31 **Figure 2.** All (45) combinations of multimorbidity (two diagnosis groups) and the association  
32 to number of symptoms.  
33

34 **Figure 3.** All (45) combinations of multimorbidity (two diagnosis groups) and the association  
35 to influence on daily activities.  
36

37  
38 **Figure 4.** All (45) combinations of multimorbidity (two diagnosis groups) and the association  
39 to concern about symptoms.  
40  
41  
42  
43  
44  
45  
46  
47  
48  
49  
50  
51  
52  
53  
54  
55  
56  
57  
58  
59  
60

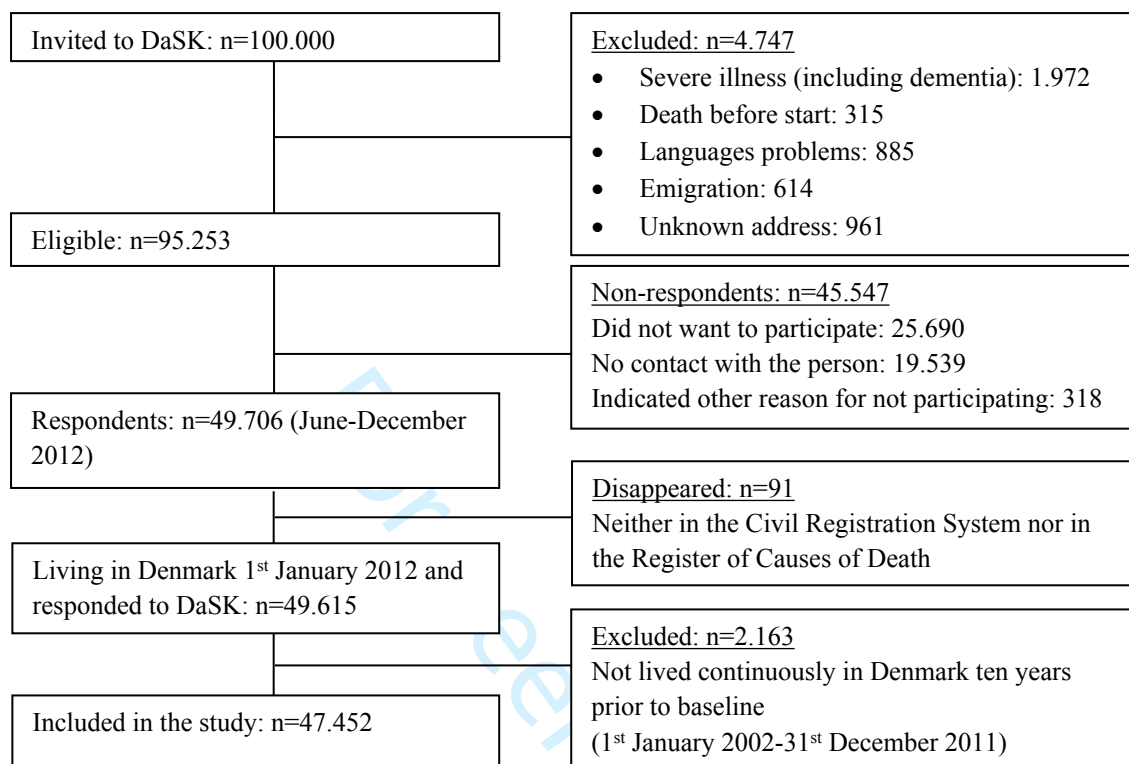

**Figure 1.** Study population.

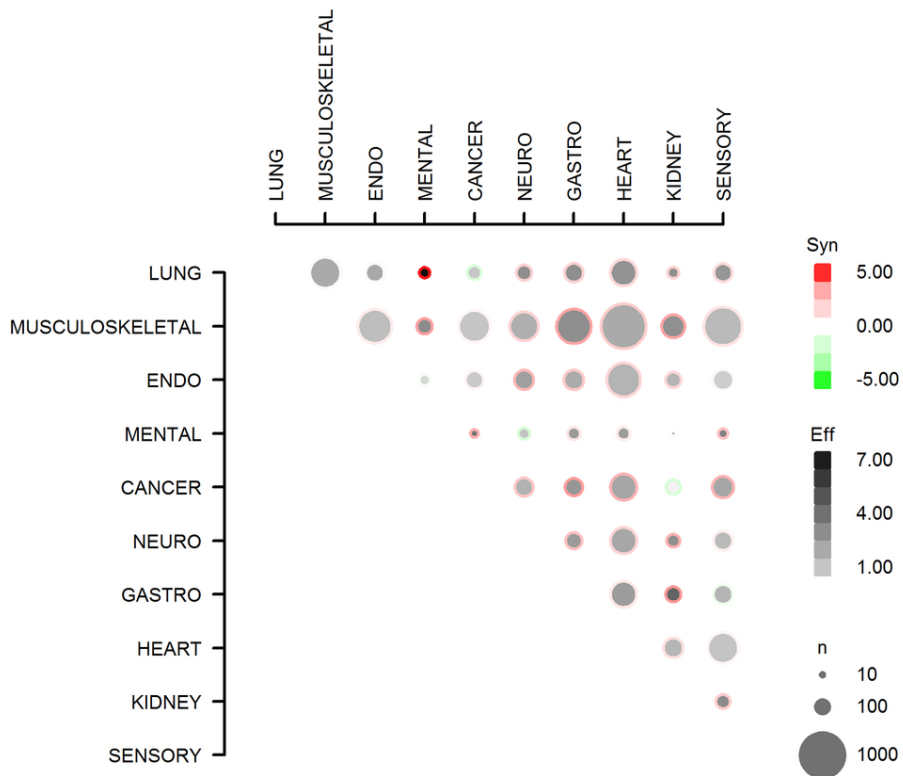

Figure 2. All (45) combinations of multimorbidity (two diagnosis groups) and the association to number of symptoms.

90x90mm (300 x 300 DPI)

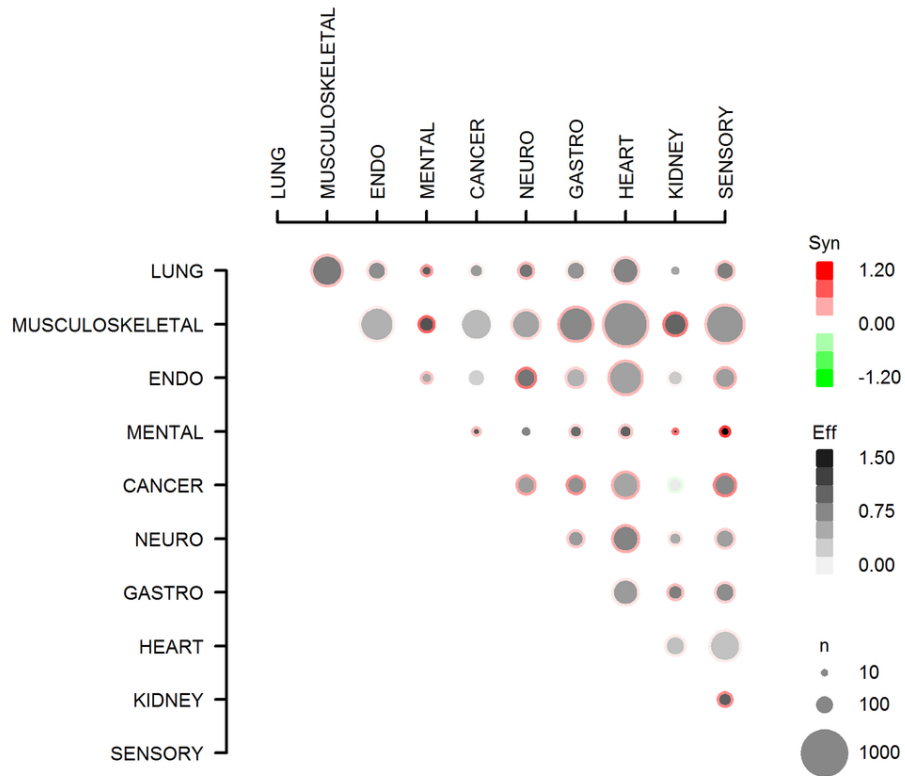

Figure 3. All (45) combinations of multimorbidity (two diagnosis groups) and the association to influence on daily activities.

90x90mm (300 x 300 DPI)

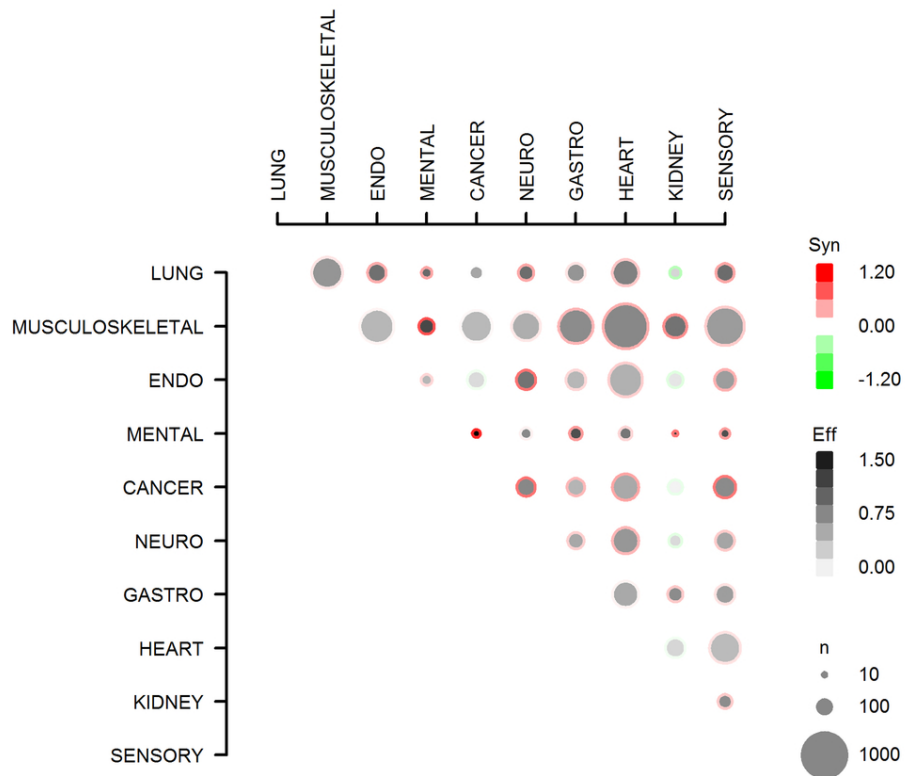

Figure 4. All (45) combinations of multimorbidity (two diagnosis groups) and the association to concern about symptoms.

90x90mm (300 x 300 DPI)



## Supplementary File 1

### Welcome to the Danish Symptom Cohort – a survey about health, symptoms and healthcare-seeking

*The questionnaire was not available in hard copy, but for illustrative purposes it has been reproduced in this appendix.*

*In order to address sex specific items with minimal disturbance to respondents, the questionnaire was distributed in two different versions; one for males and another for females. In this appendix questions from both versions are included, and each of the sex specific questions is marked with explanatory captions in italic.*

*The web-based questionnaire contains several leaps based on answers provide by the respondents (marked with explanatory captions in italic).*

We appreciate that you will take the time to complete the questionnaire.

The questionnaire is to be used for the identification of a number of bodily sensations, symptom experiences and discomfort. You may find that some of the questions are similar. It is important that you answer them all anyway. You can also answer the questions, even if you feel perfectly healthy. There is a commentary box at the end of the questionnaire, in which you can note any additional remarks.

Should you get disrupted while answering the questionnaire, you can always log on again. The system automatically saves your answers. Simply use your personal logon information again, and you can continue the survey.

When completing the questionnaire, it is also possible to return to previously answered questions.

If you have any questions or experience problems while filling in the questionnaire, please feel free to contact us by e-mail: [dask@health.sdu.dk](mailto:dask@health.sdu.dk) or by phone: 29 71 44 24 weekdays between the hours 10:00-15:00 and 19:00-21:00.

For further information about the survey, please visit our website [www.sdu.dk/dask](http://www.sdu.dk/dask). Here you will also find answers to some frequently asked questions.

Completing the questionnaire will take approximately 20-30 min.

#### **Participant acceptance:**

I accept that my answers can be used for research, and I hereby give consent to obtain information from health records and medical records for research purposes. All my answers will be treated with the strictest confidence and used solely for research purposes. The responses will be used only in anonymous form. It is of course voluntary to participate, and I may at any time withdraw this consent.

The study was approved by the Danish Data Protection Agency, Science Ethics Committee and the Danish Health and Medicines Authority, and thus complies with current legal and ethical regulations.

**I accept the above**

We are interested to hear if you have experienced any bodily sensations, symptoms or discomfort within the last four weeks. Later you will be asked when you first experienced these, and how you reacted with regard to these experiences.

Have you within **the last 4 weeks** experienced any of these? (You may tick more than one box)

- Abdominal pain
- Nausea
- Repeated vomiting
- Blood in vomit
- Difficulty swallowing
  
- Abdominal bloating
- Increased waist circumference (trousers tighter than normal)
- Change in stool texture (i.e. having hard or lumpy stools, although you usually tend to have loose or watery stools or vice versa)
- Change in frequency of bowel movements (i.e. passing stools more or less frequently than usual)
  
- Rectal bleeding/Blood in stool
- Black shiny stools
- Frequent, loose or watery stools
- Hard and lumpy stools
  
- Tiredness
- Lack of energy
- Feeling unwell or sick
- Memory problems
- Concentration problems
- Weight loss of more than 2 kg without making an effort
  
- Coughing
- Coughing up blood
- Shortness of breath
- Hoarseness
  
- Dizziness
- Headache
- Back pain
- Swollen legs
- Loss of appetite
- Lump/swollen lymph node
- Fever
  
- That you need to urinate more often than usual
- That you have to get up to urinate at night
- Difficulty emptying the bladder completely when urinating

- Pain or burning sensation when urinating
- Urge to urinate so strong that you cannot make it to the toilet in time
- Involuntary urination (incontinence) during exertion, e.g. coughing, sneezing, lifting and exercise
- Involuntary urination (incontinence) without exertion and urge (leakage)
- Blood in urine

*Only for women:*

The next questions are about sexual relations. Some of the questions may seem private, but your response may contribute to a greater understanding of whether there is a correlation between sexual relations and symptoms or discomfort from the lower abdomen. If there are questions you do not wish to answer, simply tick the category "do not wish to answer."

Have you within the **last 4 weeks** experienced any of the following?

Pelvic pain

- Yes
- No
- I don't wish to answer

Vaginal bleeding after menopause (i.e. absence of menstrual periods for more than 12 months.)

- Not relevant, as I have not yet reached menopause
- Yes
- No
- I don't wish to answer

Vaginal bleeding during or after sexual intercourse

- Not relevant, as I am not sexually active
- Yes
- No
- I don't wish to answer

Pelvic pain during intercourse

- Not relevant, as I am not sexually active
- Yes
- No
- I don't wish to answer

The next question may seem private, but your response may contribute to a greater understanding of the prevalence of symptoms or discomfort in the population. If you do not wish to answer the question, simply tick the category "Do not wish to answer."

*Only for men:*

Have you within **the last 4 weeks** experienced any of the following?

- Erectile dysfunction
- Blood in the semen
- None of the above
- I don't wish to answer

*Only for women, and only if stated that they had not yet reached the menopause:*

Are you currently pregnant, or have you been pregnant within **the last 6 months**?

- Yes
- No
- I don't know/ I don't wish to answer

*Only for women*

How many sexual relationships have you had altogether from your sexual debut and until now?

- Have not yet had my sexual debut
- 1-5
- 6-10
- 11-15
- 16-20
- 21-25
- More than 26
- I don't wish to answer

How many sexual relationships have you had within the last year?

- 0
- 1-5
- 6-10
- 11-15
- 16-20
- 21-25
- More end 26
- I don't wish to answer

*The following questions only appeared in relation to a positive expression of one or more experienced symptom(s) - by a leap structure in the electronic survey to the symptom experience*

We will now ask you some elaborating questions, which deal with the sensations, symptoms or discomfort that you have just stated.

When did you experience these for the first time:

|                          | Less than a month ago    | 1-3 months ago           | 3-6 months ago           | More than 6 months ago   |
|--------------------------|--------------------------|--------------------------|--------------------------|--------------------------|
| Abdominal pain<br>Etc... | <input type="checkbox"/> | <input type="checkbox"/> | <input type="checkbox"/> | <input type="checkbox"/> |

Within **the last 4 weeks**: To what extent did you experience that the following symptoms or discomfort interfered with your usual daily activities?

|                          | Not at all               | Slightly                 | Moderate                 | Quite a bit              | Extremely                |
|--------------------------|--------------------------|--------------------------|--------------------------|--------------------------|--------------------------|
| Abdominal Pain<br>Etc... | <input type="checkbox"/> |

Within the last 4 weeks: To what extent were you concerned about the following symptoms or discomfort?

|                          | Not at all               | Slightly                 | Moderate                 | Quite a bit              | Extremely                |
|--------------------------|--------------------------|--------------------------|--------------------------|--------------------------|--------------------------|
| Abdominal Pain<br>Etc... | <input type="checkbox"/> |

The following questions only appeared in relation to a positive expression of one or more experienced symptom(s) - by a leap structure in the electronic survey to the symptom experience

We will now ask you some questions concerning who you have talked to about the symptoms or discomfort you experienced **in the last 4 weeks**.

Have you contacted your general practitioner with any of the following symptoms or discomfort? (Through appointment, by telephone or by email)

- Yes
- No

The following questions only appeared in relation to a positive expression of one or more experienced symptom(s) - by a leap structure in the electronic survey to the symptom experience

You have been in contact with your general practitioner regarding the following symptoms and discomforts. We would now like to know, whether you had some of the following considerations, **before** contacting your general practitioner? (You may tick more than one box)

|                |                                                       | Yes                      | No                       |
|----------------|-------------------------------------------------------|--------------------------|--------------------------|
|                | I would be too embarrassed                            | <input type="checkbox"/> | <input type="checkbox"/> |
|                | I would be worried about wasting the doctor's time    | <input type="checkbox"/> | <input type="checkbox"/> |
| Abdominal pain | I would be worried about what the doctor might find   | <input type="checkbox"/> | <input type="checkbox"/> |
| Etc.           | I would be too busy to make time to go to the doctor  | <input type="checkbox"/> | <input type="checkbox"/> |
|                | Other considerations [box for free text commentaries] |                          |                          |

The following questions only appeared in relation to a positive expression of one or more experienced symptom(s) - by a leap structure in the electronic survey to the symptom experience

You have **not** been in contact with your general practitioner regarding the following symptoms and discomforts. We would now like to know, whether you had some of the following considerations, regarding contact to your general practitioner? (You may tick more than one box)

|                |                                                       | Yes                      | No                       |
|----------------|-------------------------------------------------------|--------------------------|--------------------------|
|                | I would be too embarrassed                            | <input type="checkbox"/> | <input type="checkbox"/> |
|                | I would be worried about wasting the doctor's time    | <input type="checkbox"/> | <input type="checkbox"/> |
| Abdominal pain | I would be worried about what the doctor might find   | <input type="checkbox"/> | <input type="checkbox"/> |
| Etc.           | I would be too busy to make time to go to the doctor  | <input type="checkbox"/> | <input type="checkbox"/> |
|                | Other considerations [box for free text commentaries] |                          |                          |

1  
2  
3  
4  
5  
6 Which of the following other health care professionals or therapists have you talked to/consulted  
7 regarding the symptoms or discomforts listed below (through appointment, by telephone or by  
8 email)? (you may tick more than one box)  
9

- 10  
11  
12  
13 Abdominal pain  
14 Etc.  
15  
16  
17  
18  
19
- None
  - Another doctor (practicing specialist, out-of-hours physician or hospital physician)
  - Physiotherapist/chiropractor
  - Home help/district nurse
  - Pharmacy staff
  - Alternative therapist (e.g. homeopath, healer, reflexologist)
  - Other

20  
21 Which of the following members of your family or social network have you talked to about the  
22 symptoms or discomforts listed below? (you may tick more than one box)  
23

- 24  
25  
26 Abdominal pain  
27 Etc.  
28  
29  
30  
31  
32  
33  
34  
35  
36  
37  
38  
39  
40  
41  
42  
43  
44  
45  
46  
47  
48  
49  
50  
51  
52  
53  
54  
55  
56  
57  
58  
59  
60
- None
  - Spouse/partner
  - Children
  - Parents
  - Colleague /classmate
  - Friend
  - Neighbour
  - Other

We will proceed to another category of questions regarding abdominal pain. Furthermore we ask questions regarding various factors that may have impact on abdominal pain and discomfort. Because we use several different questionnaires you might experience that some of the questions appear similar. There are however nuances in the items that are important for the survey.

In **the last 3 months**, how often did you have acid regurgitation or heartburn (a burning epigastric discomfort or burning pain in your chest)?

- Never
- Less than one day a month
- One day a month
- Two to three days a month
- One day a week
- More than one day a week
- Everyday

*The next three questions are skipped if the answer is “never” in the above-mentioned questions.*

When you experience acid regurgitation or heartburn (a burning epigastric discomfort or burning pain in your chest), how severe are your discomforts?

- Very mild
- Mild
- Moderately
- Severe
- Very severe

To what extent does your acid regurgitation or heartburn (a burning epigastric discomfort or burning pain in your chest) affect your sleep?

- My sleep is not affected
- My sleep is affected to some extent
- My sleep is affected to a great extent

To what extent does your acid regurgitation or heartburn (a burning epigastric discomfort or burning pain in your chest) affect your everyday activities?

- Not at all
- Slightly
- Moderately
- Quite a bit
- Extremely



1  
2  
3  
4  
5  
6  
7  
8  
9  
10  
11  
12  
13  
14  
15  
16  
17  
18  
19  
20  
21  
22  
23  
24  
25  
26  
27  
28  
29  
30  
31  
32  
33  
34  
35  
36  
37  
38  
39  
40  
41  
42  
43  
44  
45  
46  
47  
48  
49  
50  
51  
52  
53  
54  
55  
56  
57  
58  
59  
60

The following questions concern abdominal pain and bowel habits.

*The next questions are related to the Rome 3 criteria for IBS: IF the symptoms are experienced less than two to three days a month, the rest of the questions for IBS are skipped*

- In **the last 3 months**, how often did you have discomfort or pain anywhere in your abdomen?
- Never
  - Less than one day a month
  - One day a month
  - Two to three days a month
  - One day a week
  - More than one day a week
  - Every day

- For women:* Did this discomfort or pain occur only during your menstrual bleeding and not at other times?
- No
  - Yes
  - Does not apply because I have had the change in life (menopause) or I am a male

- Have you had this discomfort or pain **6 months or longer**?
- No
  - Yes

- How often did this discomfort or pain get better or stop after you had a bowel movement?
- Never or rarely
  - Sometimes
  - Often
  - Most of the time
  - Always

- When this discomfort or pain started, did you have more frequent bowel movements?
- Never or rarely
  - Sometimes
  - Often
  - Most of the time
  - Always

- When this discomfort or pain started, did you have less frequent bowel movements?
- Never or rarely
  - Sometimes
  - Often
  - Most of the time
  - Always

- When this discomfort or pain
- Never or rarely

1  
2  
3  
4 started, were your stools (bowel  
5 movements) looser?

- Sometimes
- Often
- Most of the time
- Always

6  
7  
8  
9  
10  
11 When this discomfort or pain  
12 started, how often did you have  
13 harder stools?

- Never or rarely
- Sometimes
- Often
- Most of the time
- Always

14  
15  
16  
17  
18 In the **last 3 months**, how often  
19 did you have hard or lumpy stools?

- Never or rarely
- About 25% of the time
- About 50% of the time
- About 75% of the time
- Always, 100% of the time

20  
21  
22  
23  
24  
25 In the **last 3 months**, how often  
26 did you have loose, mushy or  
27 watery stools?

- Never or rarely
  - About 25% of the time
  - About 50% of the time
  - About 75% of the time
  - Always, 100% of the time
- 28  
29  
30  
31  
32  
33  
34  
35  
36  
37  
38  
39  
40  
41  
42  
43  
44  
45  
46  
47  
48  
49  
50  
51  
52  
53  
54  
55  
56  
57  
58  
59  
60

The following questions concern feeling of fullness after meals and pain or burning sensation in the stomach.

*The next questions are related to the Rome 3 criteria for functional dyspepsia*

- In the **last 3 months**, how often did you feel uncomfortably full after a regular- sized meal?
- Never
  - Less than one day a month
  - One day a month
  - Two to three days a month
  - One day a week
  - More than one day a week
  - Every day

*The next questions only appeared if symptoms are experienced for one day a week or more*

- Have you had this uncomfortable fullness after meals **6 months or longer**?
- No
  - Yes

- In the **last 3 months**, how often were you unable to finish a regular size meal?
- Never
  - Less than one day a month
  - One day a month
  - Two to three days a month
  - One day a week
  - More than one day a week
  - Every day

- Have you had this inability to finish regular size meals **6 months or longer**?
- No
  - Yes

- In the **last 3 months**, how often did you have pain or burning in the middle of your abdomen, above your belly button but not in your chest?
- Never
  - Less than one day a month
  - One day a month
  - Two to three days a month
  - One day a week
  - More than one day a week
  - Every day

- Have you had this pain or burning **6 months or longer**?
- No
  - Yes

We now proceed to the next category of questions that concern symptoms or discomforts from many parts of the body and how this affects your everyday life.

Have you within **the last 4 weeks** experienced any of the following symptoms or discomforts? (You may tick more than one box)

- Palpitations/heart pounding?
- Precordial discomfort?
- Breathlessness without exertion?
- Hot or cold sweats?
- Dry mouth?
- None of the above

To what extent did you experience that the following symptoms or discomfort interfered with your usual daily activities?

- Not relevant, as I did not experience any of the above symptoms or discomforts
- Not at all
- Slightly
- Moderately
- Quite a bit
- Extremely

Have you within the **last 4 weeks** experienced any of the following symptoms or discomforts? (You may tick more than one box)

- Pains in arms or legs?
- Muscular aches or pains?
- Pains in the joints?
- Feeling of paresis or localized weakness?
- Pain moving from one place to another?
- Unpleasant numbness or tingling sensations?
- None of the above

To what extent did you experience that the following symptoms or discomfort interfered with your usual daily activities?

- Not relevant, as I did not experience any of the above symptoms or discomforts
- Not at all
- Slightly
- Moderately
- Quite a bit
- Extremely

The following questions concern trembling of the hands and trembling of other parts of the body. Your answers may contribute to a larger understanding of what part trembling plays for the quality of life and for health in general.

Do you have problems with your hands trembling when you have to drink a cup or a glass or pour it?

- Yes
- No

Do you often experience that your hands, arms or the voice tremble and quiver without you being able to control it?

- Yes
- No

Has a doctor diagnosed you with:

- Familial tremor or essential tremor
- Parkinson's disease
- None of the above

Does anyone in your family have or have had the same type of trembling as you?

- Yes
- No
- I don't know

How many of your relatives suffer from a similar trembling?

- None
- 1
- 2
- 3
- More than 3
- I don't know

Consumption of alcohol can alter certain types of trembling. When you drink alcohol, do you then experience that you trembling:

- Decreases
- Worsens
- Remains unchanged
- I don't know, because I don't drink alcohol

1  
2  
3  
4  
5 How old were you when your trembling began?  
6

7 \_\_\_\_\_ years  
8

9 Within **the last week**: If you sit at the table, do you have problems with drinking liquid from a glass?  
10

- 11  I haven't had problems drinking from the glass  
12  I can drink from the glass with one hand, but if I must avoid spilling, there may not be much  
13 liquid in the glass.  
14  I cannot drink from the glass with only one hand, but must use both hands.  
15  I cannot drink from the glass even if I use both hands, but must use a straw.  
16  
17

18 Has a doctor diagnosed one of the following causes for your trembling?  
19

- 20  I have not been diagnosed  
21  Stroke  
22  Dystonia  
23  Medication  
24  Other  
25  
26  
27  
28  
29  
30  
31  
32  
33  
34  
35  
36  
37  
38  
39  
40  
41  
42  
43  
44  
45  
46  
47  
48  
49  
50  
51  
52  
53  
54  
55  
56  
57  
58  
59  
60

We have now finished asking about specific symptoms and discomforts. The next questions are of a general nature and concern your own perception of your health, your lifestyle, your management of problems and your worry about disease.

In general, would you say your health is:

- Excellent
- Very good
- Good
- Fair
- Poor

Do you feel well enough to do what you feel like doing?

- Yes, mostly
- Yes, sometimes
- No, almost never
- I don't know

The following questions are about physical activity, smoking and alcohol habits.

How do you rate your physical fitness?

- Very good
- Good
- Fair
- Not so good
- Poor

Do you smoke?

- Yes, every day
- Yes, at least once a week
- Yes, less than once a week
- No, I have stopped
- No, I have never smoked

1  
2  
3  
4  
5 How often do you drink anything containing alcohol?  
6  
7

- 8  Never  
9  Once a month at the most  
10  2-4 times a month  
11  2-3 times a week  
12  4 times a week or more  
13

14  
15 *The following questions only appeared in relation to a positive expression of smoking and/or*  
16 *alcohol intake - by a leap structure in the electronic survey*  
17

18 How many units do you drink per week on average? (One unit corresponds to a normal beer (33 cl),  
19 a glass of wine (12 cl) or spirits (4 cl))  
20

- 21  1-7 units/week  
22  8-14 units/week  
23  15-21 units/week  
24  22-28 units/week  
25  More than 29 units/week  
26  
27

28  
29 For how many years have you smoked?  
30

31 I have smoked for approximately  
32

33 \_\_\_\_\_ years (State the number of years in whole numbers)  
34  
35

36  
37 How much do/did you smoke on average a day?  
38

39 On average I smoke approximately  
40

41 \_\_\_\_\_ cigarettes (state the approximate number of cigarettes in whole numbers)  
42

43 \_\_\_\_\_ cheroots (state the approximate number of cheroots in whole numbers)  
44

45 \_\_\_\_\_ cigars (state the approximate number of cigars in whole numbers)  
46

47 \_\_\_\_\_ pipes (state the approximate number of pipes in whole numbers)  
48  
49  
50  
51  
52  
53  
54  
55  
56  
57  
58  
59  
60



The following questions are about your height and weight.

How tall are you (without shoes)?

State your height in whole numbers measured in cm (e.g. 172)

\_\_\_\_\_cm

How much do you weigh (without clothes)?

State your weight in full kg (e.g. 67)

\_\_\_\_\_kg

The next questions are about your own concerns about your current health and whether other people have expressed concern about your current health.

To what extent are you **concerned** about your current health?

- Not at all
- Slightly
- Moderately
- Quite a bit
- Extremely

Has a doctor expressed concern about your current health?

- Yes
- No
- I don't know

Have people in your family or social network expressed concern about your current health?

- Yes
- No
- I don't know

The following questions are about your experiences with your own disease or in your social network.

Do you have any chronic disease, long-term effects after injuries, disability or other chronic disorder?

- Yes
- No
- I don't know

Have people in your immediate family (siblings, children, spouse, parents) had a serious illness?

- Yes
- No
- I don't know

Have people in your social network (friends, neighbours etc.) had a serious illness?

The following questions are about your contact with other people

How often are you in contact with friends, acquaintances or family that you do not live with? By contact is meant that you are together, talking with each other on the phone, writing to each other etc.

- Daily or almost daily
- 1-2 times a week
- 1 or more times a month
- Less than once a month
- Never
- I don't know

If you become ill and need help with practical things, can you count on help from others? (By others is meant people you do not live with)

- Yes, definitely
- Yes, maybe
- No

1  
2  
3  
4 Does it ever happen that you are alone, even if you want to be in the company of others?  
5

- 6  Yes, often  
7  Yes, once in a while  
8  Yes, but rarely  
9  No, never or almost never  
10  
11

12 Do you have someone to talk to if you have problems or need support?  
13

- 14  Yes, often  
15  Yes, mostly  
16  Yes, sometimes  
17  No, never or almost never  
18  
19  
20  
21  
22  
23  
24  
25  
26  
27  
28  
29  
30  
31  
32  
33  
34  
35  
36  
37  
38  
39  
40  
41  
42  
43  
44  
45  
46  
47  
48  
49  
50  
51  
52  
53  
54  
55  
56  
57  
58  
59  
60

The questions on this page deal with how you usually act in relation to problems and disease. For each item, place a tick in the box that best fits what you think about yourself just now. The questions are written in 'I' form, and you place your tick depending on how much you agree/disagree.

|                                                                              | Agree completely         | Tend to agree            | Yes and no               | Tend to disagree         | Disagree completely      |
|------------------------------------------------------------------------------|--------------------------|--------------------------|--------------------------|--------------------------|--------------------------|
| I say so if I am angry or sad.                                               | <input type="checkbox"/> |
| I like to talk with few chosen people when things get too much for me.       | <input type="checkbox"/> |
| I make an active effort to find a solution to my problems.                   | <input type="checkbox"/> |
| Physical exercise is important to me.                                        | <input type="checkbox"/> |
| I think something positive could come out of my complaints/problems.         | <input type="checkbox"/> |
| I firmly believe that my problems will decrease (and my situation improves). | <input type="checkbox"/> |
| I try to forget my problems.                                                 | <input type="checkbox"/> |
| I put my problems behind me by concentrating on something else.              | <input type="checkbox"/> |
| I bury myself in work to keep my problems at a distance.                     | <input type="checkbox"/> |
| I often find it difficult to do something new.                               | <input type="checkbox"/> |
| I am well on the way towards feeling I have given up.                        | <input type="checkbox"/> |
| I withdraw from other people when things get difficult.                      | <input type="checkbox"/> |

The last group of questions concern your attitude to risk and your satisfaction with your life in general

Imagine that you unexpectedly inherited DKK 10,000 (approximately USD 2,000) from a distant relative. Subsequently you have the possibility of participating in a lottery with an equal chance of doubling the money or losing the money. That means that there is a 50% chance of you winning DKK 20,000 and a 50% chance of losing the DKK 10,000.

What do you choose?

- I choose to participate in the lottery
- I choose not to participate in the lottery
- I don't know

How do you normally react in relation to health and disease. Please tick one box for each statements to show how much you agree/disagree.

|                                                                                                                | Completely agree         | Tend to agree            | Yes and no               | Tend to disagree         | Completely disagree      |
|----------------------------------------------------------------------------------------------------------------|--------------------------|--------------------------|--------------------------|--------------------------|--------------------------|
| I focus a lot on having a healthy behaviour and prefer to avoid risks that can affect my health.               | <input type="checkbox"/> |
| If I experience symptoms, I generally count on it passing.                                                     | <input type="checkbox"/> |
| I do not like to take chances regarding my health and prefer to see my GP once too often than once too little. | <input type="checkbox"/> |

In the following we will inform you how old people at your age on average can expect to become.  
If you do not want the information, please tick the box.

How old are you?

\_\_\_\_ Year

I don't want the information

Men, your age can expect to live, on average, until they are

\_\_\_\_ Year

Women, your age can expect to live, on average, until they are

\_\_\_\_ Year

Do you think that you will live longer or shorter than the average person?

- Longer than the average person
- Like the average person
- Shorter than the average person
- I don't know

On a scale from 0 till 10, where 0 means that you are very dissatisfied and 10 means that you are completely satisfied, how satisfied are you with your life in general.

Dissatisfied      0   1   2   3   4   5   6   7   8   9   10      Completely satisfied  
                                

Should you have any comments to the questionnaire, please feel free to list them here:

You have now finished the questionnaire.

Thank you very much for your reply.

If any of the questions have made you concerned about your health, we recommend that you contact  
your general practitioner.

Press exit to close the window

1  
2  
3  
4 **Supplementary File 2**  
5

6 **List of the 36 symptoms from The Danish Symptom Cohort included in this study.**  
7  
8

9

| Symptoms                        |                                    |
|---------------------------------|------------------------------------|
| Tiredness                       | Swollen legs                       |
| Night-time urination            | Difficulty in emptying the bladder |
| Lack of energy                  | Frequent urination                 |
| Headache                        | Stress incontinence                |
| Back pain                       | Shortness of breath                |
| Abdominal bloating              | Hoarseness                         |
| Memory problems                 | Urge incontinence                  |
| Abdominal pain                  | Loss of appetite                   |
| Coughing                        | Blood in stool/rectal bleeding     |
| Concentration problems          | Fever                              |
| Change in stool texture         | Difficulty swallowing              |
| Dizziness                       | Weight loss                        |
| Feeling unwell                  | Incontinence without stress/urge   |
| Constipation                    | Pain/burning when urinating        |
| Increase in waist circumference | Lump/swollen lymph node            |
| Change in stool frequency       | Black stool                        |
| Diarrhoea                       | Repeated vomiting                  |
| Nausea                          | Blood in urine                     |

10  
11  
12  
13  
14  
15  
16  
17  
18  
19  
20  
21  
22  
23  
24  
25  
26  
27  
28  
29  
30  
31  
32  
33  
34  
35  
36  
37  
38  
39  
40  
41  
42  
43  
44  
45  
46  
47  
48  
49  
50  
51  
52  
53  
54  
55  
56  
57  
58  
59  
60

### Supplementary File 3

*Symptom burden in multimorbidity. A Danish population study.*

#### Definition of Multimorbidity

In this article multimorbidity was defined in to steps

- 1) Selection of diagnoses
- 2) Grouping of diagnoses according to different systems of the body

#### Selection of diagnoses

By this definition of multimorbidity we aim to have a simple and clinically relevant definition that at the same time is able to embrace complexity. Therefore, the definition is organized according to clinical picture rather than disease etiology. Diagnoses are considered on the basis of the following criteria:

- Diagnoses with high prevalence in the Danish population. (Risk factors are not included because of the low completeness of this information in the registers)
- Diagnoses relevant for general practice
- Diagnoses causing severe loss of function and/or loss of quality of life
- Diagnoses combined with reduced life expectancy
- Diagnoses resulting in a considerable treatment burden for the patient
- Chronic conditions (e.g. conditions that "require ongoing management over a period of years or decades"(1)).

Congenital diseases are not included.

#### Grouping of diagnoses according to different systems of the body

To have multimorbidity, a patient has to have a least one diagnosis from each of two different groups of diagnoses. E.g., if a patient has asthma and COPD this patient is categorized as lung sick instead of multimorbid. This choice rests on the assumption that it is more complex from an organizational and physiological point of view if the patient suffers from diagnoses from different bodily systems. Furthermore, concordant conditions (conditions with overlapping pathophysiology and management) are intended to be gathered in the same group (2). However, diabetes and cardiovascular diseases which could be expected to share both pathophysiology and risk factors are distributed over two different groups because they after all have different clinical manifestations and different treatments. The grouping of diagnoses and count of bodily system morbidity instead of single diagnoses may better relate to the way health care is organized as well as to the complexity and burden of morbidity (3).

See table A below for the selected diagnoses and bodily systems.

#### Background for redefining multimorbidity

In the literature the variation in how to define multimorbidity is large and the lack of consensus is evident (4-6). Most studies on multimorbidity include diagnoses based on the argument that the



1  
2  
3  
4 diagnoses are common (6). However, if only selecting diagnoses based on prevalence there would  
5 be a risk of excluding many relevant conditions. In some studies authors selected a limited number  
6 of diagnoses thoroughly (7), others included all chronic ICPC codes (8), or selected specific chronic  
7 diagnoses from ICPC (9, 10). Others selected all existing ICD-10 codes without further explanation  
8 (11) or let the diagnoses count for the chapter in the ICD-10 system they came from (12). Some  
9 authors used indices, mainly developed for comorbidity, e.g. Charlson Comorbidity Index (CCI)  
10 (13, 14) and Cumulative Illness Rating Scale (CIRS) (15-17).  
11  
12

13 We could have included all possible codes from the ICD-10 system. However, doing so would have  
14 resulted in some rather small groups of multimorbidity combinations and diagnoses of less  
15 importance in relation to prevalence and mortality. To use chapters from ICD-10 could be an  
16 option, but some chapters are difficult to apply to the above stated selection criteria. Furthermore,  
17 an already existing index could be used. However, CCI was primarily developed for studying one-  
18 year mortality and we prefer a broader pallet of diagnoses than they suggest. On the other hand,  
19 CIRS could be interesting because it takes severity in to account, nevertheless, this would require  
20 access to medical records that were not available in the present register study.  
21  
22

23  
24 Tonelli et al. (18) suggested a panel of 30 conditions when doing research on multimorbidity and  
25 their recommendation was based on 40 conditions included in a Scottish study (7). Of notice, most  
26 diagnoses used in these two studies were also included in our study, with a few exceptions:  
27 connective tissue disorders, chronic pain, hypertension, severe constipation, transient ischemic  
28 attacks, diverticular disease of intestine, peripheral vascular disease, prostate disorders, chronic  
29 sinusitis, learning disability, bronchiectasis and viral hepatitis. The reason for not including these  
30 conditions is that some of them are acute rather than chronic, some of them are closely related to  
31 other conditions covered by our diagnosis groups, and the validity of the coding in the national  
32 registers is relatively low for some of the diagnoses mentioned above. In particular risk factors, like  
33 hypertension, are underreported, leading to low completeness and a larger underestimation of these  
34 conditions compared with others.  
35  
36

37 By this definition complexity can be grasped, and prevalent diseases with significant impact on  
38 patients' lives can be included, but without the need of including all possible ICD-10 codes.  
39  
40

#### 41 Registers

42  
43 The data was extracted from the following registers:  
44

- 45 The Danish National Patient Registry (NPR) (19)
  - 46 The Danish Psychiatric Central Research Register (PCRR) (20)
  - 47 The Danish Cancer Register (CR) (21)
- 48  
49

50 The registers contain information solely from the Danish hospital sector. Since we are interested in  
51 general medicine it would be optimal to use ICPC codes from primary care. However, there is no  
52 access to ICPC codes and there exist no registers validated for research with primary care data in  
53 Denmark yet.  
54

55  
56 All codes are based on International Classification of Diseases, 10<sup>th</sup> edition (ICD-10) and the earlier  
57 8<sup>th</sup> edition (ICD-8). ICD is a well-established coding system used in 117 countries and translated  
58 into 40 languages. The coding system is based on the medical specialties and hence coded in 21  
59  
60

chapters. The coding system is reliable because of the long history, the many editions with continuous improvements and the involvement of medical experts (22). ICD-10 was introduced in Denmark 1 January 1994 and the present study contains both ICD-8 and ICD-10 diagnoses. NPR contains information on all inpatient care contacts in secondary care since 1977 and from 1995 also outpatient and emergency care contacts. Psychiatric diagnoses were included in NPR from 1995 (19). ICD-8 and ICD-10 are not comparable in every detail, and this has required a pragmatic approach when selecting diagnoses. In certain cases, one cannot distinguish between acute and chronic diagnoses in ICD-8, which sometimes leads to inclusion of the corresponding broader ICD-10 diagnoses with less relevant subcategories.

The validity and completeness of the registers vary. NPR constantly control data received from hospitals for incorrect codes and inconsistencies between sex and diagnoses in order to increase validity and completeness. Validation studies have shown variation in positive predictive value (PPV) between specialties and PPV showed to be higher when including three-number digits in ICD compared to five-number digits (23). In our definition of multimorbidity the three digit level is used as the highest level. Moreover, by using groups of conditions the need of high validity of some of the variables is reduced, e.g. whether atrial fibrillation is correctly coded as fibrillation or incorrectly as atrial flutter is of minor importance, since both conditions are included in the same diagnosis group: heart disease.

In our study we included diagnoses from a window ten years back in time from year 2000. Due to this choice some prevalent cases will be mistaken for being incident. The change from ICD-8 to ICD-10 in 1994 will probably lead to a higher number of incident cases around that year (23). Since 1994 is placed in the middle of our collection period a larger number of truly prevalent cases will probably be collected before 1994 and a larger number of cases falsely considered being incident in the year after. However, we do not necessarily consider prevalent cases less important than incident. Changes in diagnostic criteria and methods over time may also have affected how to interpret incidence (19).

For CR the validity is secured through daily control routines and yearly publications where checks for internal consistency are performed. Furthermore, the register uses several sources e.g. pathology to check their own information leading to high completeness of the register (21).

Validation studies on certain diagnoses have turned out well for PCRR (24, 25), but a systematic validation of the whole register has never been performed. There exist no private hospitals in Denmark for treating psychiatric patients therefore PCRR has high completeness. It has to be kept in mind, however, that the relatively large number of people treated for psychiatric diagnoses in primary care and at private practicing psychiatrists is not included in the register (20).

### Diagnoses and organ systems included in the multimorbidity definition

|                       | ICD-10  | ICD-8 |
|-----------------------|---------|-------|
| Lung diagnoses (LUNG) |         |       |
| COPD                  | J44     | 490   |
| Chronic bronchitis    | J41-J42 | 491   |
| Emphysema             | J43     | 492   |
| Asthma                | J45-J46 | 493   |

|                                                                                                                                                                                                                                |                                           |                                               |
|--------------------------------------------------------------------------------------------------------------------------------------------------------------------------------------------------------------------------------|-------------------------------------------|-----------------------------------------------|
| Musculoskeletal diagnoses (MUSCULOSKELETAL)                                                                                                                                                                                    |                                           |                                               |
| Rheumatic diagnoses / arthritis                                                                                                                                                                                                | L40.5, M05-M07                            | 696.09, 712, 715                              |
| Arthrosis                                                                                                                                                                                                                      | M15-M17                                   | 713.00-09                                     |
| Back diagnoses                                                                                                                                                                                                                 | M45, M47, M50-M51, M53-M54                | 712.49, 725, 728                              |
| Osteoporosis                                                                                                                                                                                                                   | M80-M82                                   | 723.09                                        |
| Endocrine diagnoses (ENDO)                                                                                                                                                                                                     |                                           |                                               |
| Hypothyroidisme                                                                                                                                                                                                                | E03                                       | 244                                           |
| Hyperthyroidisme                                                                                                                                                                                                               | E05                                       | 242                                           |
| Diabetes                                                                                                                                                                                                                       | E10-E14                                   | 249-250                                       |
| Mental diagnoses (MENTAL)                                                                                                                                                                                                      |                                           |                                               |
| Inclusion of all patients registered with a psychiatric diagnose in Psychiatric Central Register (except for patients having only Y - or Z-diagnoses) (26) and the following dementia and alcohol-related diagnoses from DNPR: |                                           |                                               |
| Dementia                                                                                                                                                                                                                       | G30, G31.8-9, F00, F01, F02.0, F02.3, F03 | 290, 293                                      |
| Alcohol                                                                                                                                                                                                                        | F10.1-F10.9                               | 291, 303                                      |
| Cancer (CANCER)                                                                                                                                                                                                                |                                           |                                               |
| All diagnoses from CR except C44, non-melanoma skin cancer.                                                                                                                                                                    |                                           |                                               |
| Neurological diagnoses (NEURO)                                                                                                                                                                                                 |                                           |                                               |
| Apoplexia cerebri (stroke)                                                                                                                                                                                                     | I60-I64, I69                              | 430-431, 433-434, 436-437                     |
| Multiple sclerosis                                                                                                                                                                                                             | G35                                       | 340                                           |
| Epilepsy                                                                                                                                                                                                                       | G40                                       | 345                                           |
| Migraine                                                                                                                                                                                                                       | G43                                       | 346                                           |
| Parkinson disease                                                                                                                                                                                                              | G20                                       | 342                                           |
| Gastrointestinal diagnoses (GASTRO)                                                                                                                                                                                            |                                           |                                               |
| Dyspepsia                                                                                                                                                                                                                      | K30                                       | 536.90-91                                     |
| Mb. Crohn and colitis ulcerosa                                                                                                                                                                                                 | K50-K51                                   | 563                                           |
| Colon irritabile                                                                                                                                                                                                               | K58                                       | 564.19                                        |
| Chronic liver disease                                                                                                                                                                                                          | K70-K76                                   | 571-573                                       |
| Chronic pancreatitis                                                                                                                                                                                                           | K86.0, K86.1                              | 577.10, 577.11, 577.19                        |
| Cardiovascular diagnoses (HEART)                                                                                                                                                                                               |                                           |                                               |
| Ischemic heart disease                                                                                                                                                                                                         | I20-I25                                   | 410-413                                       |
| Heart failure and arrhythmia                                                                                                                                                                                                   | I44.1-7, I45.2-9, I47-I50                 | 427.09, 427.19, 427.23-24, 427.90-97, 428     |
| Heart valve diagnoses                                                                                                                                                                                                          | I05-I08, I34-I37                          | 394-396, 397.00, 397.01, 424.00-19, 424.90-92 |
| Genitourinary diagnoses (KIDNEY)                                                                                                                                                                                               |                                           |                                               |

|                                       |                                               |                                    |
|---------------------------------------|-----------------------------------------------|------------------------------------|
| Chronic kidney disease                | N03-N05, N11-N12, N18-N19, Z49, Z99.2         | 581, 582, 583, 590.09, 590.15, 792 |
| Urinary incontinence                  | N39.3-4                                       | 786.29                             |
| Endometriosis                         | N80                                           | 625.30-39                          |
| Diagnoses in sensory organs (SENSORY) |                                               |                                    |
| Glaucoma                              | H40                                           | 375                                |
| Blindness and low vision              | H54.0-54.3, H54.7                             | 379.09, 379.19                     |
| Loss of hearing                       | H90.0, H90.2, H90.3, H90.5, H90.6, H90.8, H91 | 388, 389.09, 389.99                |
| Psoriasis                             | L40                                           | 696.10, 696.19                     |

**Table A.** In order to have multimorbidity the patient needs at least one diagnosis from two different bodily systems; for instance COPD from LUNG and multiple sclerosis from NEURO.

## References

1. WHO. Innovative care for chronic conditions: building blocks for action: global report. Available at: [http://www.who.int/chp/knowledge/publications/iccc\\_ch1.pdf](http://www.who.int/chp/knowledge/publications/iccc_ch1.pdf); Geneva, Switzerland; 2002.
2. Piette JD, Kerr EA. The impact of comorbid chronic conditions on diabetes care. *Diabetes care.* 2006;29(3):725-31.
3. Doessing A BV. Care coordination of multimorbidity: a scoping study. *J of Comorbidity.* 2015;5:15-28.
4. Willadsen TG, Bebe A, Koster-Rasmussen R, et al. The role of diseases, risk factors and symptoms in the definition of multimorbidity - a systematic review. *Scand J Prim Health Care.* 2016;34(2):112-21.
5. Huntley AL, Johnson R, Purdy S, et al. Measures of multimorbidity and morbidity burden for use in primary care and community settings: a systematic review and guide. *AnnFamMed.* 2012;10(2):134-41.
6. Diederichs C, Berger K, Bartels DB. The measurement of multiple chronic diseases--a systematic review on existing multimorbidity indices. *J GerontolA BiolSciMedSci.* 2011;66(3):301-11.
7. Barnett K, Mercer SW, Norbury M, et al. Epidemiology of multimorbidity and implications for health care, research, and medical education: a cross-sectional study. *Lancet.* 2012;380(9836):37-43.

- 1
- 2
- 3
- 4 8. van den Akker M, Buntinx F, Metsemakers JF, et al. Multimorbidity in general
- 5 practice: prevalence, incidence, and determinants of co-occurring chronic and
- 6 recurrent diseases. *Journal of clinical epidemiology*. 1998;51(5):367-75.
- 7
- 8
- 9 9. O'Halloran J, Miller GC, Britt H. Defining chronic conditions for primary care with
- 10 ICPC-2. *Family practice*. 2004;21(4):381-6.
- 11
- 12 10. Rizza A, Kaplan V, Senn O, et al. Age- and gender-related prevalence of
- 13 multimorbidity in primary care: the Swiss FIRE project. *BMC FamPract*.
- 14 2012;24(13):113.
- 15
- 16
- 17 11. Mazya AL, Eckerblad J, Jaarsma T, et al. The Ambulatory Geriatric Assessment - A
- 18 Frailty Intervention Trial (AGe-FIT) - A randomised controlled trial aimed to prevent
- 19 hospital readmissions and functional deterioration in high risk older adults: A study
- 20 protocol. *European Geriatric Medicine*. 2013;4(4).
- 21
- 22
- 23 12. Schneider F, Kaplan V, Rodak R, et al. Prevalence of multimorbidity in medical
- 24 inpatients. *Swiss MedWkly*. 2012;142:w13533.
- 25
- 26 13. Charlson ME, Pompei P, Ales KL, et al. A new method of classifying prognostic
- 27 comorbidity in longitudinal studies: development and validation. *Journal of chronic*
- 28 *diseases*. 1987;40(5):373-83.
- 29
- 30
- 31 14. Van Eijk MS, Van Der Linde H, Buijck B, et al. Predicting prosthetic use in elderly
- 32 patients after major lower limb amputation. *ProsthetOrthotInt*. 2012;36(1):45-52.
- 33
- 34 15. Hudon C, Fortin M, Vanasse A. Cumulative Illness Rating Scale was a reliable and
- 35 valid index in a family practice context. *J ClinEpidemiol*. 2005;58(6):603-8.
- 36
- 37 16. Linn BS, Linn MW, Gurel L. Cumulative illness rating scale. *Journal of the American*
- 38 *Geriatrics Society*. 1968;16(5):622-6.
- 39
- 40
- 41 17. Fortin M, Dubois MF, Hudon C, et al. Multimorbidity and quality of life: a closer
- 42 look. *Health and quality of life outcomes*. 2007;5:52.
- 43
- 44 18. Tonelli M, Wiebe N, Fortin M, et al. Methods for identifying 30 chronic conditions:
- 45 application to administrative data. *BMC medical informatics and decision making*.
- 46 2015;15:31.
- 47
- 48
- 49 19. Lynge E, Sandegaard JL, Rebolj M. The Danish National Patient Register.
- 50 *Scandinavian journal of public health*. 2011;39(7 Suppl):30-3.
- 51
- 52 20. Mors O, Perto GP, Mortensen PB. The Danish Psychiatric Central Research Register.
- 53 *Scandinavian journal of public health*. 2011;39(7 Suppl):54-7.
- 54
- 55
- 56 21. Gjerstorff ML. The Danish Cancer Registry. *Scandinavian journal of public health*.
- 57 2011;39(7 Suppl):42-5.
- 58
- 59
- 60

- 1  
2  
3  
4 22. ICD-10, International Statistical Classification of Diseases and Related Health  
5 Problems 10th Revision, Intruction Maunal. World Health Orginazation, 2010.  
6 Available from: [http://www.who.int/classifications/icd/ICD10Volume2\\_en\\_2010.pdf](http://www.who.int/classifications/icd/ICD10Volume2_en_2010.pdf)  
7 [Last accessed: Dec 11, 2017].  
8  
9  
10 23. Schmidt M, Schmidt SA, Sandegaard JL, et al. The Danish National Patient Registry:  
11 a review of content, data quality, and research potential. *Clinical epidemiology*.  
12 2015;7:449-90.  
13  
14 24. Bock C, Bukh JD, Vinberg M, et al. Validity of the diagnosis of a single depressive  
15 episode in a case register. *Clin Pract Epidemiol Ment Health*. 2009;5:4.  
16  
17 25. Jakobsen KD, Frederiksen JN, Hansen T, et al. Reliability of clinical ICD-10  
18 schizophrenia diagnoses. *Nord J Psychiatry*. 2005;59(3):209-12.  
19  
20 26. Larsen JR, Siersma VD, Davidsen AS, et al. The excess mortality of patients with  
21 diabetes and concurrent psychiatric illness is markedly reduced by structured personal  
22 diabetes care: A 19-year follow up of the randomized controlled study Diabetes Care  
23 in General Practice (DCGP). *Gen Hosp Psychiatry*. 2016;38:42-52.  
24  
25  
26  
27  
28  
29  
30  
31  
32  
33  
34  
35  
36  
37  
38  
39  
40  
41  
42  
43  
44  
45  
46  
47  
48  
49  
50  
51  
52  
53  
54  
55  
56  
57  
58  
59  
60

**Supplementary File 4 Prevalence of symptoms for the ten diagnosis groups and for the group without diagnoses.**

| Symptom                 | Total |       | No diagnosis |      | LUNG |      | MUSKULO SKELETAL |      | ENDO |      | MENTAL |      | CANCER |      | NEURO |      | GASTRO |      | HEART |      | KIDNEY |      | SENSORY |      |
|-------------------------|-------|-------|--------------|------|------|------|------------------|------|------|------|--------|------|--------|------|-------|------|--------|------|-------|------|--------|------|---------|------|
|                         | N     | %     | N            | %    | N    | %    | N                | %    | N    | %    | N      | %    | N      | %    | N     | %    | N      | %    | N     | %    | N      | %    | N       | %    |
| Total                   | 47452 | 100.0 | 30225        | 63.7 | 1595 | 3.4  | 6957             | 14.7 | 2214 | 4.7  | 471    | 1.0  | 2457   | 5.2  | 1679  | 3.5  | 2202   | 4.6  | 3878  | 8.2  | 1067   | 2.3  | 2614    | 5.5  |
| No symptom              | 4224  | 8.9   | 2990         | 9.9  | 72   | 4.5  | 475              | 6.8  | 136  | 6.1  | 27     | 5.7  | 195    | 7.9  | 93    | 5.5  | 104    | 4.7  | 281   | 7.2  | 68     | 6.4  | 209     | 8.0  |
| Tiredness               | 23252 | 49.0  | 14598        | 48.3 | 914  | 57.3 | 3422             | 49.2 | 1211 | 54.7 | 271    | 57.5 | 1226   | 49.9 | 965   | 57.5 | 1294   | 58.8 | 1896  | 48.9 | 632    | 59.2 | 1155    | 44.2 |
| Night-time urination    | 23122 | 48.7  | 13136        | 43.5 | 919  | 57.6 | 4126             | 59.3 | 1353 | 61.1 | 291    | 61.8 | 1408   | 57.3 | 991   | 59.0 | 1265   | 57.4 | 2520  | 65.0 | 588    | 55.1 | 1646    | 63.0 |
| Lack of energy          | 17623 | 37.1  | 10962        | 36.3 | 744  | 46.6 | 2671             | 38.4 | 888  | 40.1 | 229    | 48.6 | 943    | 38.4 | 728   | 43.4 | 1013   | 46.0 | 1477  | 38.1 | 483    | 45.3 | 894     | 34.2 |
| Headache                | 16969 | 35.8  | 11294        | 37.4 | 558  | 35.0 | 2316             | 33.3 | 667  | 30.1 | 149    | 31.6 | 736    | 30.0 | 651   | 38.8 | 942    | 42.8 | 986   | 25.4 | 447    | 41.9 | 624     | 23.9 |
| Back pain               | 15200 | 32.0  | 8689         | 28.7 | 617  | 38.7 | 3256             | 46.8 | 791  | 35.7 | 189    | 40.1 | 758    | 30.9 | 575   | 34.2 | 949    | 43.1 | 1373  | 35.4 | 444    | 41.6 | 900     | 34.4 |
| Abdominal bloating      | 13951 | 29.4  | 8886         | 29.4 | 540  | 33.9 | 2024             | 29.1 | 662  | 29.9 | 112    | 23.8 | 665    | 27.1 | 507   | 30.2 | 931    | 42.3 | 1022  | 26.4 | 385    | 36.1 | 626     | 23.9 |
| Memory problems         | 9365  | 19.7  | 5254         | 17.4 | 440  | 27.6 | 1639             | 23.6 | 533  | 24.1 | 186    | 39.5 | 578    | 23.5 | 566   | 33.7 | 644    | 29.2 | 912   | 23.5 | 300    | 28.1 | 656     | 25.1 |
| Abdominal pain          | 9189  | 19.4  | 5491         | 18.2 | 395  | 24.8 | 1487             | 21.4 | 455  | 20.6 | 107    | 22.7 | 500    | 20.4 | 382   | 22.8 | 825    | 37.5 | 724   | 18.7 | 292    | 27.4 | 453     | 17.3 |
| Coughing                | 8396  | 17.7  | 5033         | 16.7 | 598  | 37.5 | 1341             | 19.3 | 442  | 20.0 | 145    | 30.8 | 422    | 17.2 | 343   | 20.4 | 478    | 21.7 | 757   | 19.5 | 233    | 21.8 | 471     | 18.0 |
| Concentration problems  | 8154  | 17.2  | 4940         | 16.3 | 339  | 21.3 | 1263             | 18.2 | 417  | 18.8 | 165    | 35.0 | 455    | 18.5 | 454   | 27.0 | 563    | 25.6 | 636   | 16.4 | 245    | 23.0 | 412     | 15.8 |
| Change in stool texture | 8055  | 17.0  | 4900         | 16.2 | 341  | 21.4 | 1257             | 18.1 | 414  | 18.7 | 105    | 22.3 | 418    | 17.0 | 323   | 19.2 | 565    | 25.7 | 687   | 17.7 | 240    | 22.5 | 427     | 16.3 |
| Dizziness               | 7476  | 15.8  | 4138         | 13.7 | 355  | 22.3 | 1313             | 18.9 | 476  | 21.5 | 116    | 24.6 | 426    | 17.3 | 459   | 27.3 | 521    | 23.7 | 877   | 22.6 | 242    | 22.7 | 560     | 21.4 |
| Feeling unwell          | 6903  | 14.6  | 4240         | 14.0 | 333  | 20.9 | 1065             | 15.3 | 387  | 17.5 | 92     | 19.5 | 350    | 14.2 | 303   | 18.0 | 503    | 22.8 | 547   | 14.1 | 214    | 20.1 | 332     | 12.7 |
| Constipation            | 6847  | 14.4  | 3891         | 12.9 | 277  | 17.4 | 1207             | 17.3 | 389  | 17.6 | 78     | 16.6 | 426    | 17.3 | 352   | 21.0 | 449    | 20.4 | 695   | 17.9 | 256    | 24.0 | 402     | 15.4 |
| Increase in             | 6223  | 13.1  | 3774         | 12.5 | 279  | 17.5 | 985              | 14.2 | 295  | 13.3 | 70     | 14.9 | 308    | 12.5 | 238   | 14.2 | 428    | 19.4 | 514   | 13.3 | 212    | 19.9 | 320     | 12.2 |

1  
2  
3  
4  
5  
6  
7  
8  
9  
10  
11  
12  
13  
14  
15  
16  
17  
18  
19  
20  
21  
22  
23  
24  
25  
26  
27  
28  
29  
30  
31  
32  
33  
34  
35  
36  
37  
38  
39  
40  
41  
42  
43  
44  
45  
46

|                                    |      |      |      |      |     |      |      |      |     |      |     |      |     |      |     |      |     |      |     |      |     |      |     |      |
|------------------------------------|------|------|------|------|-----|------|------|------|-----|------|-----|------|-----|------|-----|------|-----|------|-----|------|-----|------|-----|------|
| waist circumference                |      |      |      |      |     |      |      |      |     |      |     |      |     |      |     |      |     |      |     |      |     |      |     |      |
| Change in stool frequency          | 6107 | 12.9 | 3634 | 12.0 | 262 | 16.4 | 999  | 14.4 | 345 | 15.6 | 74  | 15.7 | 349 | 14.2 | 247 | 14.7 | 444 | 20.2 | 542 | 14.0 | 189 | 17.7 | 357 | 13.7 |
| Diarrhoea                          | 6020 | 12.7 | 3700 | 12.2 | 276 | 17.3 | 925  | 13.3 | 316 | 14.3 | 77  | 16.3 | 320 | 13.0 | 225 | 13.4 | 502 | 22.8 | 464 | 12.0 | 171 | 16.0 | 260 | 9.9  |
| Nausea                             | 5884 | 12.4 | 3509 | 11.6 | 269 | 16.9 | 941  | 13.5 | 334 | 15.1 | 92  | 19.5 | 350 | 14.2 | 280 | 16.7 | 446 | 20.3 | 480 | 12.4 | 212 | 19.9 | 258 | 9.9  |
| Swollen legs                       | 5852 | 12.3 | 2634 | 8.7  | 369 | 23.1 | 1481 | 21.3 | 530 | 23.9 | 89  | 18.9 | 456 | 18.6 | 344 | 20.5 | 405 | 18.4 | 913 | 23.5 | 275 | 25.8 | 498 | 19.1 |
| Difficulty in emptying the bladder | 5542 | 11.7 | 2765 | 9.1  | 292 | 18.3 | 1146 | 16.5 | 358 | 16.2 | 102 | 21.7 | 361 | 14.7 | 347 | 20.7 | 408 | 18.5 | 751 | 19.4 | 216 | 20.2 | 505 | 19.3 |
| Frequent urination                 | 4972 | 10.5 | 2641 | 8.7  | 228 | 14.3 | 970  | 13.9 | 327 | 14.8 | 106 | 22.5 | 342 | 13.9 | 298 | 17.7 | 325 | 14.8 | 632 | 16.3 | 162 | 15.2 | 398 | 15.2 |
| Stress incontinence                | 4639 | 9.8  | 2511 | 8.3  | 253 | 15.9 | 991  | 14.2 | 298 | 13.5 | 50  | 10.6 | 350 | 14.2 | 200 | 11.9 | 297 | 13.5 | 415 | 10.7 | 279 | 26.1 | 312 | 11.9 |
| Shortness of breath                | 3782 | 8.0  | 1670 | 5.5  | 659 | 41.3 | 861  | 12.4 | 264 | 11.9 | 105 | 22.3 | 214 | 8.7  | 218 | 13.0 | 304 | 13.8 | 641 | 16.5 | 140 | 13.1 | 323 | 12.4 |
| Hoarseness                         | 3630 | 7.7  | 2000 | 6.6  | 291 | 18.2 | 630  | 9.1  | 231 | 10.4 | 59  | 12.5 | 220 | 9.0  | 196 | 11.7 | 236 | 10.7 | 417 | 10.8 | 124 | 11.6 | 264 | 10.1 |
| Urge incontinence                  | 2976 | 6.3  | 1296 | 4.3  | 162 | 10.2 | 766  | 11.0 | 234 | 10.6 | 61  | 13.0 | 227 | 9.2  | 219 | 13.0 | 216 | 9.8  | 454 | 11.7 | 193 | 18.1 | 331 | 12.7 |
| Loss of appetite                   | 2902 | 6.1  | 1609 | 5.3  | 182 | 11.4 | 513  | 7.4  | 190 | 8.6  | 95  | 20.2 | 201 | 8.2  | 192 | 11.4 | 247 | 11.2 | 288 | 7.4  | 92  | 8.6  | 174 | 6.7  |
| Blood in stool/rectal bleeding     | 2141 | 4.5  | 1343 | 4.4  | 89  | 5.6  | 300  | 4.3  | 93  | 4.2  | 26  | 5.5  | 105 | 4.3  | 87  | 5.2  | 160 | 7.3  | 183 | 4.7  | 58  | 5.4  | 114 | 4.4  |
| Fever                              | 1805 | 3.8  | 1184 | 3.9  | 76  | 4.8  | 258  | 3.7  | 80  | 3.6  | 20  | 4.2  | 81  | 3.3  | 65  | 3.9  | 108 | 4.9  | 115 | 3.0  | 48  | 4.5  | 80  | 3.1  |
| Difficulty swallowing              | 1665 | 3.5  | 843  | 2.8  | 111 | 7.0  | 321  | 4.6  | 122 | 5.5  | 36  | 7.6  | 117 | 4.8  | 123 | 7.3  | 156 | 7.1  | 207 | 5.3  | 66  | 6.2  | 124 | 4.7  |
| Weight loss                        | 1405 | 3.0  | 734  | 2.4  | 83  | 5.2  | 279  | 4.0  | 99  | 4.5  | 39  | 8.3  | 112 | 4.6  | 107 | 6.4  | 125 | 5.7  | 167 | 4.3  | 41  | 3.8  | 90  | 3.4  |
| Incontinence without stress/urge   | 1136 | 2.4  | 441  | 1.5  | 74  | 4.6  | 293  | 4.2  | 92  | 4.2  | 37  | 7.9  | 111 | 4.5  | 88  | 5.2  | 110 | 5.0  | 165 | 4.3  | 137 | 12.8 | 141 | 5.4  |



1  
2  
3  
4  
5  
6  
7  
8  
9  
10  
11  
12  
13  
14  
15  
16  
17  
18  
19  
20  
21  
22  
23  
24  
25  
26  
27  
28  
29  
30  
31  
32  
33  
34  
35  
36  
37  
38  
39  
40  
41  
42  
43  
44  
45  
46

|                             |     |     |     |     |    |     |     |     |    |     |      |      |     |     |     |     |     |     |     |     |      |      |     |     |
|-----------------------------|-----|-----|-----|-----|----|-----|-----|-----|----|-----|------|------|-----|-----|-----|-----|-----|-----|-----|-----|------|------|-----|-----|
| Pain/burning when urinating | 971 | 2.0 | 483 | 1.6 | 48 | 3.0 | 211 | 3.0 | 71 | 3.2 | 10   | 2.1  | 83  | 3.4 | 55  | 3.3 | 86  | 3.9 | 118 | 3.0 | 54   | 5.1  | 76  | 2.9 |
| Lump/swollen lymph node     | 753 | 1.6 | 456 | 1.5 | 35 | 2.2 | 117 | 1.7 | 39 | 1.8 | 12   | 2.5  | 63  | 2.6 | 26  | 1.5 | 47  | 2.1 | 58  | 1.5 | 29   | 2.7  | 30  | 1.1 |
| Black stool                 | 725 | 1.5 | 421 | 1.4 | 46 | 2.9 | 111 | 1.6 | 48 | 2.2 | 16   | 3.4  | 39  | 1.6 | 33  | 2.0 | 58  | 2.6 | 69  | 1.8 | 15   | 1.4  | 47  | 1.8 |
| Repeated vomiting           | 586 | 1.2 | 316 | 1.0 | 34 | 2.1 | 115 | 1.7 | 46 | 2.1 | 27   | 5.7  | 41  | 1.7 | 34  | 2.0 | 54  | 2.5 | 53  | 1.4 | 29   | 2.7  | 32  | 1.2 |
| Blood in urine              | 264 | 0.6 | 117 | 0.4 | 16 | 1.0 | 70  | 1.0 | 19 | 0.9 | 4    | 0.8  | 17  | 0.7 | 18  | 1.1 | 14  | 0.6 | 47  | 1.2 | 22   | 2.1  | 21  | 0.8 |
| Coughing up blood           | 58  | 0.1 | 35  | 0.1 | 6  | 0.4 | 8   | 0.1 | 4  | 0.2 | none | none | few |     | few |     | few |     | 6   | 0.2 | few  | 0    | 4   | 0.2 |
| Blood in vomit              | 47  | 0.1 | 27  | 0.1 | 4  | 0.3 | 10  | 0.1 | 6  | 0.3 | few  |      | few |     | few |     | 7   | 0.3 | 5   | 0.1 | none | none | few |     |

LUNG = lung diagnoses, MUSCULOSKELETAL = musculoskeletal diagnoses, ENDO = endocrine diagnoses, MENTAL = mental diagnoses, CANCER = cancer diagnoses, NEURO = neurological diagnoses, GASTRO = gastrointestinal diagnoses, HEART = cardiovascular diagnoses, KIDNEY = genitourinary diagnoses, SENSORY = sensory organ diagnoses

**Supplementary File 5** Descriptive overview of patient characteristics for the participants in The Danish Symptom Cohort at baseline for each diagnosis group.

| Baseline characteristics*       | Total        | No diagnosis | LUNG       | MUSCULO-SKELETAL | ENDO        | MENTAL     | CANCER      | NEURO      | GASTRO      | HEART       | KIDNEY     | SENSORY     |
|---------------------------------|--------------|--------------|------------|------------------|-------------|------------|-------------|------------|-------------|-------------|------------|-------------|
|                                 | N (%)        | N (%)        | N (%)      | N (%)            | N (%)       | N (%)      | N (%)       | N (%)      | N (%)       | N (%)       | N (%)      | N (%)       |
| <b>Total</b>                    | 47452 (100)  | 30225 (63.7) | 1595 (3.4) | 6957 (14.7)      | 2214 (4.7)  | 471 (1.0)  | 2457 (5.2)  | 1679 (3.5) | 2202 (4.6)  | 3878 (8.2)  | 1067 (2.3) | 2614 (5.5)  |
| <b>Sex</b>                      |              |              |            |                  |             |            |             |            |             |             |            |             |
| Male                            | 22278 (47.0) | 14627 (48.4) | 699 (43.8) | 2759 (39.7)      | 969 (43.8)  | 299 (63.5) | 882 (35.9)  | 787 (46.9) | 922 (41.9)  | 2329 (60.1) | 208 (19.5) | 1427 (54.6) |
| <b>Age</b>                      |              |              |            |                  |             |            |             |            |             |             |            |             |
| 20-39                           | 11362 (23.9) | 9266 (30.7)  | 234 (14.7) | 607 (8.7)        | 220 (9.9)   | 35 (7.4)   | 366 (14.9)  | 244 (14.5) | 373 (16.9)  | 135 (3.5)   | 144 (13.5) | 113 (4.3)   |
| 40-64                           | 25269 (53.3) | 16493 (54.6) | 747 (46.8) | 3700 (53.2)      | 1148 (51.9) | 277 (58.8) | 1078 (43.9) | 801 (47.7) | 1193 (54.2) | 1590 (41.0) | 577 (54.1) | 939 (35.9)  |
| 65-79                           | 9602 (20.2)  | 4149 (13.7)  | 524 (32.9) | 2287 (32.9)      | 734 (33.2)  | 129 (27.4) | 871 (35.4)  | 523 (31.1) | 564 (25.6)  | 1765 (45.5) | 284 (26.6) | 1194 (45.7) |
| 80                              | 1219 (2.6)   | 317 (1.0)    | 90 (5.6)   | 363 (5.2)        | 112 (5.1)   | 30 (6.4)   | 142 (5.8)   | 111 (6.6)  | 72 (3.3)    | 388 (10.0)  | 62 (5.8)   | 368 (14.1)  |
| <b>MM (≥2 diagnosis groups)</b> |              |              |            |                  |             |            |             |            |             |             |            |             |
| Yes                             | 5652 (11.9)  |              | 953 (59.7) | 3127 (44.9)      | 1351 (61.0) | 309 (65.6) | 1183 (48.1) | 997 (59.4) | 1213 (55.1) | 2332 (60.1) | 613 (57.5) | 1481 (56.7) |
| <b>Highest education</b>        |              |              |            |                  |             |            |             |            |             |             |            |             |
| Primary school                  | 9374 (19.8)  | 5153 (17.0)  | 431 (27.0) | 1790 (25.7)      | 609 (27.5)  | 152 (32.3) | 568 (23.1)  | 451 (26.9) | 561 (25.5)  | 1067 (27.5) | 280 (26.2) | 682 (26.1)  |
| Secondary school <sup>1</sup>   | 21635 (45.6) | 14039 (46.4) | 721 (45.2) | 3095 (44.5)      | 1009 (45.6) | 196 (41.6) | 1046 (42.6) | 738 (44.0) | 1030 (46.8) | 1670 (43.1) | 440 (41.2) | 1118 (42.8) |
| Higher educations <sup>2</sup>  | 15869 (33.4) | 10690 (35.4) | 421 (26.4) | 1989 (28.6)      | 565 (25.5)  | 110 (23.4) | 815 (33.2)  | 465 (27.7) | 591 (26.8)  | 1066 (27.5) | 340 (31.9) | 753 (28.8)  |
| None registered                 | 574 (1.2)    | 343 (1.1)    | 22 (1.4)   | 83 (1.2)         | 31 (1.4)    | 13 (2.8)   | 28 (1.1)    | 25 (1.5)   | 20 (0.9)    | 75 (1.9)    | 7 (0.7)    | 61 (2.3)    |
| <b>Income<sup>3</sup></b>       |              |              |            |                  |             |            |             |            |             |             |            |             |
| 0-179.999                       | 11218 (23.6) | 6637 (22.0)  | 536 (33.6) | 1859 (26.7)      | 689 (31.1)  | 203 (43.1) | 640 (26.0)  | 496 (29.5) | 591 (26.8)  | 1187 (30.6) | 273 (25.6) | 796 (30.5)  |
| 180.000-239.999                 | 12092 (25.5) | 7450 (24.6)  | 441 (27.6) | 1902 (27.3)      | 605 (27.3)  | 134 (28.5) | 661 (26.9)  | 466 (27.8) | 613 (27.8)  | 1044 (26.9) | 308 (28.9) | 734 (28.1)  |
| 240.000-309.999                 | 12056 (25.4) | 8004 (26.5)  | 317 (19.9) | 1631 (23.4)      | 484 (21.9)  | 79 (16.8)  | 566 (23.0)  | 377 (22.5) | 544 (24.7)  | 825 (21.3)  | 254 (23.8) | 536 (20.5)  |
| 310.000+                        | 12086 (25.5) | 8134 (26.9)  | 301 (18.9) | 1565 (22.5)      | 436 (19.7)  | 55 (11.7)  | 590 (24.0)  | 340 (20.3) | 454 (20.6)  | 822 (21.2)  | 232 (21.7) | 548 (21.0)  |
| <b>Working status</b>           |              |              |            |                  |             |            |             |            |             |             |            |             |
| Working                         | 29205 (61.6) | 21311 (70.5) | 660 (41.4) | 2924 (42.0)      | 892 (40.3)  | 133 (28.2) | 1125 (45.8) | 640 (38.1) | 1097 (49.8) | 1248 (32.2) | 523 (49.0) | 766 (29.3)  |
| Out of workforce <sup>4</sup>   | 6130 (12.9)  | 3766 (12.5)  | 274 (17.2) | 1081 (15.5)      | 361 (16.3)  | 155 (32.9) | 249 (10.1)  | 361 (21.5) | 398 (18.1)  | 386 (10.0)  | 172 (16.1) | 228 (8.7)   |
| Pensioners                      | 12117 (25.5) | 5148 (17.0)  | 661 (41.4) | 2952 (42.4)      | 961 (43.4)  | 183 (38.9) | 1083 (44.1) | 678 (40.4) | 707 (32.1)  | 2244 (57.9) | 372 (34.9) | 1620 (62.0) |

|    |                                        |              |              |             |             |             |            |             |             |             |             |            |             |
|----|----------------------------------------|--------------|--------------|-------------|-------------|-------------|------------|-------------|-------------|-------------|-------------|------------|-------------|
| 1  |                                        |              |              |             |             |             |            |             |             |             |             |            |             |
| 2  | <b>Asset<sup>5</sup></b>               |              |              |             |             |             |            |             |             |             |             |            |             |
| 3  | <0                                     | 15695 (33.1) | 10543 (34.9) | 524 (32.9)  | 2017 (29.0) | 717 (32.4)  | 196 (41.6) | 695 (28.3)  | 516 (30.7)  | 771 (35.0)  | 960 (24.8)  | 357 (33.5) | 511 (19.5)  |
| 4  | 0-399,999                              | 15747 (33.2) | 10131 (33.5) | 550 (34.5)  | 2351 (33.8) | 783 (35.4)  | 163 (34.6) | 788 (32.1)  | 562 (33.5)  | 751 (34.1)  | 1210 (31.2) | 391 (36.6) | 838 (32.1)  |
| 5  | 400,000+                               | 16010 (33.7) | 9551 (31.6)  | 521 (32.7)  | 2589 (37.2) | 714 (32.2)  | 112 (23.8) | 974 (39.6)  | 601 (35.8)  | 680 (30.9)  | 1708 (44.0) | 319 (29.9) | 1265 (48.4) |
| 6  | <b>Urbanisation degree<sup>6</sup></b> |              |              |             |             |             |            |             |             |             |             |            |             |
| 7  | Rural                                  | 16621 (35.0) | 10303 (34.1) | 552 (34.6)  | 2581 (37.1) | 803 (36.3)  | 157 (33.3) | 863 (35.1)  | 605 (36.0)  | 879 (39.9)  | 1490 (38.4) | 402 (37.7) | 945 (36.2)  |
| 8  | Small town                             | 17346 (36.6) | 10981 (36.3) | 559 (35.0)  | 2548 (36.6) | 763 (34.5)  | 148 (31.4) | 940 (38.3)  | 596 (35.5)  | 804 (36.5)  | 1481 (38.2) | 392 (36.7) | 995 (38.1)  |
| 9  | Capital city                           | 13485 (28.4) | 8941 (29.6)  | 484 (30.3)  | 1828 (26.3) | 648 (29.3)  | 166 (35.2) | 654 (26.6)  | 478 (28.5)  | 519 (23.6)  | 907 (23.4)  | 273 (25.6) | 674 (25.8)  |
| 10 | <b>Cohabiting</b>                      |              |              |             |             |             |            |             |             |             |             |            |             |
| 11 | Yes                                    | 35614 (75.1) | 22830 (75.5) | 1098 (68.8) | 5189 (74.6) | 1601 (72.3) | 239 (50.7) | 1822 (74.2) | 1194 (71.1) | 1633 (74.2) | 2899 (74.8) | 791 (74.1) | 1858 (71.1) |
| 12 | <b>Smoking</b>                         |              |              |             |             |             |            |             |             |             |             |            |             |
| 13 | Yes, current                           | 9860 (20.8)  | 6384 (21.1)  | 345 (21.6)  | 1390 (20.0) | 470 (21.2)  | 223 (47.3) | 480 (19.5)  | 362 (21.6)  | 463 (21.0)  | 663 (17.1)  | 206 (19.3) | 442 (16.9)  |
| 14 | Yes, former                            | 15030 (31.7) | 8493 (28.1)  | 656 (41.1)  | 2605 (37.4) | 903 (40.8)  | 134 (28.5) | 1026 (41.8) | 595 (35.4)  | 789 (35.8)  | 1766 (45.5) | 392 (36.7) | 1102 (42.2) |
| 15 | Never                                  | 20754 (43.7) | 14385 (47.6) | 488 (30.6)  | 2641 (38.0) | 734 (33.2)  | 76 (16.1)  | 821 (33.4)  | 617 (36.7)  | 842 (38.2)  | 1236 (31.9) | 404 (37.9) | 910 (34.8)  |
| 16 | No answer                              | 1808 (3.8)   | 963 (3.2)    | 106 (6.6)   | 321 (4.6)   | 107 (4.8)   | 38 (8.1)   | 130 (5.3)   | 105 (6.3)   | 108 (4.9)   | 213 (5.5)   | 65 (6.1)   | 160 (6.1)   |
| 17 | <b>Alcohol consumption<sup>7</sup></b> |              |              |             |             |             |            |             |             |             |             |            |             |
| 18 | 1-7 units/week                         | 30261 (63.8) | 19679 (65.1) | 927 (58.1)  | 4326 (62.2) | 1361 (61.5) | 140 (29.7) | 1538 (62.6) | 1014 (60.4) | 1396 (63.4) | 2239 (57.7) | 690 (64.7) | 1515 (58.0) |
| 19 | 8-21 units/week                        | 10320 (21.8) | 6696 (22.2)  | 309 (19.4)  | 1456 (20.9) | 371 (16.8)  | 104 (22.1) | 514 (20.9)  | 309 (18.4)  | 373 (16.9)  | 917 (23.6)  | 171 (16.0) | 670 (25.6)  |
| 20 | >21 units/week                         | 1669 (3.5)   | 1058 (3.5)   | 60 (3.8)    | 218 (3.1)   | 66 (3.0)    | 61 (13.0)  | 82 (3.3)    | 48 (2.9)    | 66 (3.0)    | 175 (4.5)   | 15 (1.4)   | 107 (4.1)   |
| 21 | Never                                  | 14515 (30.6) | 1820 (6.0)   | 192 (12.0)  | 635 (9.1)   | 308 (13.9)  | 128 (27.2) | 192 (7.8)   | 203 (12.1)  | 258 (11.7)  | 334 (8.6)   | 126 (11.8) | 162 (6.2)   |
| 22 | No answer                              | 11623 (24.5) | 972 (3.2)    | 107 (6.7)   | 322 (4.6)   | 108 (4.9)   | 38 (8.1)   | 131 (5.3)   | 105 (6.3)   | 109 (5.0)   | 213 (5.5)   | 65 (6.1)   | 160 (6.1)   |

\*At baseline 1 January, 2012

<sup>1</sup> Secondary school: secondary school, high school and higher-level vocational studies.

<sup>2</sup> Higher educations: short and medium higher education or college diploma, university degree (bachelor or master), doctoral degree.

<sup>3</sup> Income: divided in quartiles.

<sup>4</sup> Out of workforce: unemployed, student, apprentice or intern, or incapacity benefits.

<sup>5</sup> Asset: divided in tertiles.

<sup>6</sup> Rural: at least 50 % of the population in the municipality lives in a thinly populated area. Small town: Intermediate density area. Less than 50 % of the population lives in a densely populated area and less than 50 % of the population lives in a thinly populated area. Capital: At least 50 % of the population lives in a densely populated area.

<sup>7</sup> Moderate: 0-7 units/week women, 0-14 units/week men. High: >7units/week for women, >14units/week men. 1 unit=4 cl alcohol 40% or 1 glass of wine or 1 beer 33 cl 4.5%.

LUNG = lung diagnoses, MUSCULOSKELETAL = musculoskeletal diagnoses, ENDO = endocrine diagnoses, MENTAL = mental diagnoses, CANCER = cancer diagnoses, NEURO = neurological diagnoses, GASTRO = gastrointestinal diagnoses, HEART = cardiovascular diagnoses, KIDNEY = genitourinary diagnoses, SENSORY = sensory organ diagnoses

STROBE Statement—Checklist of items that should be included in reports of *cohort studies*

|                           | Item No | Recommendation                                                                                                                                                                                                                                                                                                                                                                                                                                                                                                                                                                                                                                                                                                                                                                                                                                                                                                                                                                                                                                                                                                                                                                                                                                                                                                                                                                                                                                                                                                                                                                                 |
|---------------------------|---------|------------------------------------------------------------------------------------------------------------------------------------------------------------------------------------------------------------------------------------------------------------------------------------------------------------------------------------------------------------------------------------------------------------------------------------------------------------------------------------------------------------------------------------------------------------------------------------------------------------------------------------------------------------------------------------------------------------------------------------------------------------------------------------------------------------------------------------------------------------------------------------------------------------------------------------------------------------------------------------------------------------------------------------------------------------------------------------------------------------------------------------------------------------------------------------------------------------------------------------------------------------------------------------------------------------------------------------------------------------------------------------------------------------------------------------------------------------------------------------------------------------------------------------------------------------------------------------------------|
| <b>Title and abstract</b> | 1       | <p>(a) Indicate the study’s design with a commonly used term in the title or the abstract</p> <p>(b) Provide in the abstract an informative and balanced summary of what was done and what was found</p>                                                                                                                                                                                                                                                                                                                                                                                                                                                                                                                                                                                                                                                                                                                                                                                                                                                                                                                                                                                                                                                                                                                                                                                                                                                                                                                                                                                       |
|                           |         | <p>1 (a) A combined population-based questionnaire- and registry study.</p> <p>(b) <b>Design:</b> A combined population-based questionnaire- and registry study.<br/> <b>Participants:</b> In 2012, 47,452 participants from the Danish Symptom Cohort answered a questionnaire on symptom presence, interference with usual daily activities and concern of symptoms.<br/> <b>Setting:</b> The Danish nationwide health registries were queried for these participants from 2002-2011 to see whether single diagnoses and multimorbidity occurred. Multimorbidity was defined as having diagnoses from at least two out of ten predefined groups of diagnoses. Multivariable models were used to estimate the association between symptom burden and diagnosis groups.<br/> <b>Main outcome measure:</b> Symptom burden.<br/> <b>Results:</b> Overall, 91.1% of the respondents reported one or more symptom(s) within the preceding four weeks, 36.3% of the study sample belonged to at least one diagnosis group and 11.9% had multimorbidity. Symptom burden was slightly higher for people with a diagnosis than for people not having the diagnosis in the registers. Mostly, symptom burden was increased for people with multimorbidity, and this increase was in excess of the sum of the increase attributable to the individual diagnosis groups.<br/> <b>Conclusion:</b> Patients with multimorbidity reported higher symptom burden than the sum of burden from two persons with the individual diagnoses, indicating symptom burden being supra-additive in multimorbidity.</p> |
| <b>Introduction</b>       |         |                                                                                                                                                                                                                                                                                                                                                                                                                                                                                                                                                                                                                                                                                                                                                                                                                                                                                                                                                                                                                                                                                                                                                                                                                                                                                                                                                                                                                                                                                                                                                                                                |
| Background/rationale      | 2       | <p>Explain the scientific background and rationale for the investigation being reported</p> <p>Please see page 4, the “<i>introduction</i>”.</p>                                                                                                                                                                                                                                                                                                                                                                                                                                                                                                                                                                                                                                                                                                                                                                                                                                                                                                                                                                                                                                                                                                                                                                                                                                                                                                                                                                                                                                               |
| Objectives                | 3       | <p>State specific objectives, including any prespecified hypotheses</p> <p>Stated on page 4.</p> <p>The aim of this study was to explore how symptom burden is affected when diagnosis groups appear in combination (multimorbidity) compared to when they appear separately. We hypothesized that symptom burden in multimorbidity is additive i.e. that symptom burden in patients having multimorbidity is equivalent to the sum of symptom burden reported from two persons belonging to the diagnosis groups individually.</p>                                                                                                                                                                                                                                                                                                                                                                                                                                                                                                                                                                                                                                                                                                                                                                                                                                                                                                                                                                                                                                                            |
| <b>Methods</b>            |         |                                                                                                                                                                                                                                                                                                                                                                                                                                                                                                                                                                                                                                                                                                                                                                                                                                                                                                                                                                                                                                                                                                                                                                                                                                                                                                                                                                                                                                                                                                                                                                                                |
| Study design              | 4       | <p>Present key elements of study design early in the paper</p> <p>4. Stated on page 4 in the article: “<i>Study design and population</i>”<br/> Participants were from the Danish Symptom Cohort (DaSK), a population-based study conducted in Denmark in June-December, 2012.</p>                                                                                                                                                                                                                                                                                                                                                                                                                                                                                                                                                                                                                                                                                                                                                                                                                                                                                                                                                                                                                                                                                                                                                                                                                                                                                                             |
| Setting                   | 5       | <p>Describe the setting, locations, and relevant dates, including periods of recruitment, exposure, follow-up, and data collection</p> <p>Stated on page 4 in the section “<i>Study design and population</i>”</p>                                                                                                                                                                                                                                                                                                                                                                                                                                                                                                                                                                                                                                                                                                                                                                                                                                                                                                                                                                                                                                                                                                                                                                                                                                                                                                                                                                             |

|    |                              |    |                                                                                                               |
|----|------------------------------|----|---------------------------------------------------------------------------------------------------------------|
| 1  |                              |    | “People invited for the study lived in Denmark 1 <sup>st</sup> January, 2012 (baseline). Of                   |
| 2  |                              |    | 100.000 persons randomly selected from the general Danish population aged 20 or                               |
| 3  |                              |    | older, 95.253 persons were eligible and invited (Figure 1). Of these, 49.706 (52.2%)                          |
| 4  |                              |    | answered the questionnaire (15). “                                                                            |
| 5  |                              |    |                                                                                                               |
| 6  | Participants                 | 6  | (a) Give the eligibility criteria, and the sources and methods of selection of                                |
| 7  |                              |    | participants. Describe methods of follow-up                                                                   |
| 8  |                              |    |                                                                                                               |
| 9  |                              |    |                                                                                                               |
| 10 |                              |    | (b) For matched studies, give matching criteria and number of exposed and unexposed                           |
| 11 |                              |    |                                                                                                               |
| 12 |                              |    | (a) “People invited for the study lived in Denmark 1 <sup>st</sup> January, 2012 (baseline).                  |
| 13 |                              |    | Of 100.000 persons randomly selected from the general Danish population                                       |
| 14 |                              |    | aged 20 or older, 95.253 persons were eligible and invited (Figure 1). Of                                     |
| 15 |                              |    | these, 49.706 (52.2%) answered the questionnaire (15). “                                                      |
| 16 |                              |    |                                                                                                               |
| 17 |                              |    | (b) Not applicable.                                                                                           |
| 18 |                              |    |                                                                                                               |
| 19 | Variables                    | 7  | Clearly define all outcomes, exposures, predictors, potential confounders, and effect                         |
| 20 |                              |    | modifiers. Give diagnostic criteria, if applicable                                                            |
| 21 |                              |    | Please see page 4-6 and the sections “ <i>Symptoms and symptom burden</i> ” and                               |
| 22 |                              |    | “ <i>Multimorbidity</i> ” and Supplementary File 5.                                                           |
| 23 |                              |    |                                                                                                               |
| 24 |                              |    |                                                                                                               |
| 25 | Data sources/<br>measurement | 8* | For each variable of interest, give sources of data and details of methods of                                 |
| 26 |                              |    | assessment (measurement). Describe comparability of assessment methods if there is                            |
| 27 |                              |    | more than one group                                                                                           |
| 28 |                              |    | Please see page 4-6 in the Methods section.                                                                   |
| 29 |                              |    | “All immigrated or live born individuals in Denmark receive a unique personal                                 |
| 30 |                              |    | identification number stored in the Danish Civil Registration System (CRS) (16). CRS                          |
| 31 |                              |    | contains information on age, sex, vital status, etc., and CRS enables linking                                 |
| 32 |                              |    | information from different Danish registries. Information on diagnoses leading to                             |
| 33 |                              |    | either inpatient or outpatient care was collected from the Danish National Patient                            |
| 34 |                              |    | Register (NPR) (17), the Danish Cancer Registry (18), and the Danish Psychiatric                              |
| 35 |                              |    | Central Research Register (PCRR) (19). Information on education (20), work status                             |
| 36 |                              |    | (21), family income (22), assets (banks, stocks, bonds, and housing, within and                               |
| 37 |                              |    | outside Denmark) (22), degree of urbanization and cohabitation status derived from                            |
| 38 |                              |    | other nationwide registers stored in Statistics Denmark.”                                                     |
| 39 |                              |    |                                                                                                               |
| 40 |                              |    | “Information on diagnoses is retrieved from the nationwide health registries in the ten                       |
| 41 |                              |    | years period preceding baseline (1 <sup>st</sup> January, 2002-31 <sup>st</sup> December, 2011). Participants |
| 42 |                              |    | are excluded if they have not been living continuously in Denmark during this 10-year                         |
| 43 |                              |    | period”.                                                                                                      |
| 44 |                              |    |                                                                                                               |
| 45 |                              |    | Information on symptom burden is retrieved from the questionnaire.                                            |
| 46 |                              |    |                                                                                                               |
| 47 | Bias                         | 9  | Describe any efforts to address potential sources of bias                                                     |
| 48 |                              |    | Please see page 10 the section “ <i>Strengths and limitations</i> ”                                           |
| 49 |                              |    |                                                                                                               |
| 50 |                              |    |                                                                                                               |
| 51 | Study size                   | 10 | Explain how the study size was arrived at                                                                     |
| 52 |                              |    | Page 4: “Participants were from the Danish Symptom Cohort (DaSK), a population-                               |
| 53 |                              |    | based study conducted in Denmark in June-December, 2012. People invited for the                               |
| 54 |                              |    | study lived in Denmark 1 <sup>st</sup> January, 2012 (baseline). Of 100.000 persons randomly                  |
| 55 |                              |    | selected from the general Danish population aged 20 or older, 95.253 persons were                             |
| 56 |                              |    | eligible and invited (Figure 1). Of these, 49.706 (52.2%) answered the questionnaire                          |
| 57 |                              |    | (15).”                                                                                                        |
| 58 |                              |    |                                                                                                               |
| 59 | Quantitative variables       | 11 | Explain how quantitative variables were handled in the analyses. If applicable,                               |
| 60 |                              |    | describe which groupings were chosen and why                                                                  |

|                                                                        |     |                                                                                                                                                                                                                                                                                                                                                                                                                                                                                                                                                                                                                                                                                                                                                                                                                              |
|------------------------------------------------------------------------|-----|------------------------------------------------------------------------------------------------------------------------------------------------------------------------------------------------------------------------------------------------------------------------------------------------------------------------------------------------------------------------------------------------------------------------------------------------------------------------------------------------------------------------------------------------------------------------------------------------------------------------------------------------------------------------------------------------------------------------------------------------------------------------------------------------------------------------------|
|                                                                        |     | Please see supplementary file 5 for baseline information. We had four quantitative variables: age, income, assets, and alcohol consumption. Income and assets were divided into quartiles.<br>Age was divided into four groups, younger and older adults in the working age and younger and older among the retired adults.<br>Alcohol was divided in moderate and high drinking for men and women.                                                                                                                                                                                                                                                                                                                                                                                                                          |
| Statistical methods                                                    | 12  | Please see page 6, the section “ <i>Statistical analysis</i> ”<br>(a) Describe all statistical methods, including those used to control for confounding<br>(b) Describe any methods used to examine subgroups and interactions<br>(c) Explain how missing data were addressed<br>(d) If applicable, explain how loss to follow-up was addressed<br>(e) Describe any sensitivity analyses                                                                                                                                                                                                                                                                                                                                                                                                                                     |
| <b>Results</b>                                                         |     |                                                                                                                                                                                                                                                                                                                                                                                                                                                                                                                                                                                                                                                                                                                                                                                                                              |
| Participants                                                           | 13* | Please see the “ <i>Result</i> ” section (page 7) and Figure 1.<br>(a) Report numbers of individuals at each stage of study—eg numbers potentially eligible, examined for eligibility, confirmed eligible, included in the study, completing follow-up, and analysed<br>(b) Give reasons for non-participation at each stage<br>(c) Consider use of a flow diagram                                                                                                                                                                                                                                                                                                                                                                                                                                                           |
| Descriptive data                                                       | 14* | Please see Supplementary file 5.<br>(a) Give characteristics of study participants (eg demographic, clinical, social) and information on exposures and potential confounders<br>(b) Indicate number of participants with missing data for each variable of interest<br>(c) Summarise follow-up time (eg, average and total amount) <b>Not done</b>                                                                                                                                                                                                                                                                                                                                                                                                                                                                           |
| Outcome data                                                           | 15* | Report numbers of outcome events or summary measures over time <b>Please see Table 1 and Supplementary file 4.</b>                                                                                                                                                                                                                                                                                                                                                                                                                                                                                                                                                                                                                                                                                                           |
| Main results                                                           | 16  | (a) Give unadjusted estimates and, if applicable, confounder-adjusted estimates and their precision (eg, 95% confidence interval). Make clear which confounders were adjusted for and why they were included<br><b>We adjusted for age, sex, socioeconomic status (highest completed education, income, assets, and work status), urbanization degree, cohabitation status, smoking and alcohol. They were included because we believe they can affect the relation between diagnoses and symptoms, as well as how symptoms are interpreted. Please see Supplementary File 5, Table 1, and Figure 2a-c.</b><br>(b) Report category boundaries when continuous variables were categorized<br>(c) If relevant, consider translating estimates of relative risk into absolute risk for a meaningful time period <b>Not done</b> |
| Other analyses                                                         | 17  | Report other analyses done—eg analyses of subgroups and interactions, and sensitivity analyses <b>Please see page 6 “Statistical analyses”</b>                                                                                                                                                                                                                                                                                                                                                                                                                                                                                                                                                                                                                                                                               |
| <b>Discussion</b> <b>Please see the discussion section, page 9-12.</b> |     |                                                                                                                                                                                                                                                                                                                                                                                                                                                                                                                                                                                                                                                                                                                                                                                                                              |
| Key results                                                            | 18  | Summarise key results with reference to study objectives                                                                                                                                                                                                                                                                                                                                                                                                                                                                                                                                                                                                                                                                                                                                                                     |
| Limitations                                                            | 19  | Discuss limitations of the study, taking into account sources of potential bias or imprecision. Discuss both direction and magnitude of any potential bias                                                                                                                                                                                                                                                                                                                                                                                                                                                                                                                                                                                                                                                                   |
| Interpretation                                                         | 20  | Give a cautious overall interpretation of results considering objectives, limitations, multiplicity of analyses, results from similar studies, and other relevant evidence                                                                                                                                                                                                                                                                                                                                                                                                                                                                                                                                                                                                                                                   |
| Generalisability                                                       | 21  | Discuss the generalisability (external validity) of the study results                                                                                                                                                                                                                                                                                                                                                                                                                                                                                                                                                                                                                                                                                                                                                        |
| <b>Other information</b>                                               |     |                                                                                                                                                                                                                                                                                                                                                                                                                                                                                                                                                                                                                                                                                                                                                                                                                              |
| Funding                                                                | 22  | Give the source of funding and the role of the funders for the present study and, if                                                                                                                                                                                                                                                                                                                                                                                                                                                                                                                                                                                                                                                                                                                                         |

---

1 applicable, for the original study on which the present article is based

2 Please see page 12.

---

3  
4  
5 \*Give information separately for exposed and unexposed groups.

6  
7 **Note:** An Explanation and Elaboration article discusses each checklist item and gives methodological background and  
8 published examples of transparent reporting. The STROBE checklist is best used in conjunction with this article (freely  
9 available on the Web sites of PLoS Medicine at <http://www.plosmedicine.org/>, Annals of Internal Medicine at  
10 <http://www.annals.org/>, and Epidemiology at <http://www.epidem.com/>). Information on the STROBE Initiative is  
11 available at <http://www.strobe-statement.org>.  
12  
13  
14  
15  
16  
17  
18  
19  
20  
21  
22  
23  
24  
25  
26  
27  
28  
29  
30  
31  
32  
33  
34  
35  
36  
37  
38  
39  
40  
41  
42  
43  
44  
45  
46  
47  
48  
49  
50  
51  
52  
53  
54  
55  
56  
57  
58  
59  
60

For peer review only

# BMJ Open

## Symptom burden in multimorbidity. A population-based combined questionnaire and registry study from Denmark

|                                 |                                                                                                                                                                                                                                                                                                                                                                                                                                                                                                                                                                    |
|---------------------------------|--------------------------------------------------------------------------------------------------------------------------------------------------------------------------------------------------------------------------------------------------------------------------------------------------------------------------------------------------------------------------------------------------------------------------------------------------------------------------------------------------------------------------------------------------------------------|
| Journal:                        | <i>BMJ Open</i>                                                                                                                                                                                                                                                                                                                                                                                                                                                                                                                                                    |
| Manuscript ID                   | bmjopen-2020-041877.R1                                                                                                                                                                                                                                                                                                                                                                                                                                                                                                                                             |
| Article Type:                   | Original research                                                                                                                                                                                                                                                                                                                                                                                                                                                                                                                                                  |
| Date Submitted by the Author:   | 16-Feb-2021                                                                                                                                                                                                                                                                                                                                                                                                                                                                                                                                                        |
| Complete List of Authors:       | Willadsen, Tora; University of Copenhagen, Department of Public Health<br>Siersma, Volkert; University of Copenhagen, Department of Public Health<br>Nicolaisdottir, Dagny; University of Copenhagen, Department of Public Health<br>Jarbol, Dorte; University of Southern Denmark, The Research Unit for General Practice<br>Guassora, Ann; University of Copenhagen, Department of Public Health<br>Reventlow, Susanne; University of Copenhagen, Department of Public Health<br>Køster-Rasmussen, Rasmus; University of Copenhagen, Department of Public Health |
| <b>Primary Subject Heading</b>: | General practice / Family practice                                                                                                                                                                                                                                                                                                                                                                                                                                                                                                                                 |
| Secondary Subject Heading:      | General practice / Family practice, Epidemiology                                                                                                                                                                                                                                                                                                                                                                                                                                                                                                                   |
| Keywords:                       | EPIDEMIOLGY, PRIMARY CARE, PUBLIC HEALTH                                                                                                                                                                                                                                                                                                                                                                                                                                                                                                                           |
|                                 |                                                                                                                                                                                                                                                                                                                                                                                                                                                                                                                                                                    |

SCHOLARONE™  
Manuscripts





I, the Submitting Author has the right to grant and does grant on behalf of all authors of the Work (as defined in the below author licence), an exclusive licence and/or a non-exclusive licence for contributions from authors who are: i) UK Crown employees; ii) where BMJ has agreed a CC-BY licence shall apply, and/or iii) in accordance with the terms applicable for US Federal Government officers or employees acting as part of their official duties; on a worldwide, perpetual, irrevocable, royalty-free basis to BMJ Publishing Group Ltd ("BMJ") its licensees and where the relevant Journal is co-owned by BMJ to the co-owners of the Journal, to publish the Work in this journal and any other BMJ products and to exploit all rights, as set out in our [licence](#).

The Submitting Author accepts and understands that any supply made under these terms is made by BMJ to the Submitting Author unless you are acting as an employee on behalf of your employer or a postgraduate student of an affiliated institution which is paying any applicable article publishing charge ("APC") for Open Access articles. Where the Submitting Author wishes to make the Work available on an Open Access basis (and intends to pay the relevant APC), the terms of reuse of such Open Access shall be governed by a Creative Commons licence – details of these licences and which [Creative Commons](#) licence will apply to this Work are set out in our licence referred to above.

Other than as permitted in any relevant BMJ Author's Self Archiving Policies, I confirm this Work has not been accepted for publication elsewhere, is not being considered for publication elsewhere and does not duplicate material already published. I confirm all authors consent to publication of this Work and authorise the granting of this licence.

1  
2  
3  
4  
5  
6 **Symptom burden in multimorbidity. A population-based combined questionnaire and**  
7 **registry study from Denmark**  
8  
9

10  
11  
12  
13  
14  
15 Grauers Willadsen T<sup>1</sup>, Siersma V<sup>1</sup>, Rós Nicolaisdóttir D<sup>1</sup>, Jarbol D<sup>2</sup>, Guassora AD<sup>1</sup>,  
16 Reventlow S<sup>1</sup> and Køster-Rasmussen R<sup>1</sup>  
17  
18

19  
20  
21  
22  
23  
24  
25  
26 <sup>1</sup>The Research Unit for General Practice and Section of General Practice, Department of  
27 Public Health, University of Copenhagen, Copenhagen, Denmark  
28

29 <sup>2</sup>The Research Unit of General Practice, Department of Public Health, University of Southern  
30 Denmark, Odense, Denmark  
31  
32

33  
34  
35  
36 **Corresponding author:** *Tora Grauers Willadsen, The Research Unit for General Practice,*  
37 *Department of Public Health, University of Copenhagen, Øster Farimagsgade 5, DK-1014,*  
38 *Post Box 2099, Copenhagen, Denmark. Email: [tora.willadsen@sund.ku.dk](mailto:tora.willadsen@sund.ku.dk)*  
39  
40  
41  
42  
43  
44  
45

46 Tables: 2  
47

48 Figures: 4  
49

50 Words: 3340  
51  
52  
53  
54  
55  
56  
57  
58  
59  
60

## Abstract

**Objective:** Patients with multimorbidity may carry a large symptom burden. Symptoms are often what drive patients to seek healthcare, and they also assist doctors with diagnosis. We examined whether symptom burden is additive in people with multimorbidity compared to people with a single morbidity.

**Design:** Longitudinal cohort study drawing on questionnaire and Danish national registry data. Multimorbidity was defined as having diagnoses from at least two out of ten morbidity groups. Associations between morbidity groups and symptom burden were estimated with multivariable models.

**Participants:** In 2012, 47,452 participants from the Danish Symptom Cohort answered a questionnaire about symptoms (36 symptoms in total) including whether symptoms were affecting their daily activities (*impairment score*), and their worries about present symptoms (*worry score*) (the highest score among the 36 symptoms on a 0-4 scale).

**Main outcome measure:** The primary outcome was symptom burden.

**Results:** Participants without morbidity reported 4.77 symptoms (out of 36 possible). Participants with one, two, or three morbidities reported, respectively, (0.95 [CI 0.86-1.03]; 1.87 [1.73-2.01]; 2.89 [2.66-3.12]) more symptoms than patients without morbidity. Furthermore, they reported a higher impairment score, (0.36 [0.32-0.39]; 0.65 [0.60-0.70]; 1.06 [0.98-1.14]), and a higher worry score, (0.34 [0.31-0.37]; 0.62 [0.57-0.66]; 1.02 [0.94-1.10]) than participants without morbidity. In 45 possible combinations of multimorbidity (participants with two morbidities) interaction effects were additive in 37, 41 and 36 combinations, for number of symptoms, impairment score, and worry score, respectively.

**Conclusion:** Participants without morbidity reported a substantial number of symptoms. Having a single morbidity or multimorbidity resulted in approximately one extra symptom for each extra morbidity. In most combinations of multimorbidity symptom burden was additive.

### Strengths and limitations of this study.

- This study combines high quality data from Danish national registries and questionnaire data from the background population.
- The questionnaire used in this study draws on a breadth of symptoms indicative of both serious and less harmful diseases.
- The selection of symptoms in the questionnaire is not exhaustive which may induce artificial differences between morbidities. Nevertheless, this does not bias synergy estimates.
- Multimorbidity is defined as having two or more morbidities. In this study, a morbidity is defined as having one or more chronic diagnoses from one of ten predefined morbidity groups: LUNG, MUSCULOSKELETAL, ENDOCRINE, MENTAL HEALTH, CANCER, NEUROLOGICAL, GASTROINTESTINAL, CARDIOVASCULAR, GENITOURINARY and SENSORY.

## Introduction

Multimorbidity, most often defined as the co-occurrence of two or more chronic diseases,(1) affects mental health,(2) quality of life,(3) and survival,(4) and patients with multimorbidity often struggle to manage their symptoms.(5) Symptoms play a major part in how people self-rate their health.(6) Factors like disability, duration, and feelings of vulnerability are important drivers for how a sensation gradually turns into a symptom,(7) where interpretations of danger and intensity can be decisive in making a contact with healthcare.(8) Hence, the presence of symptoms is important for doctors to be able to formulate a diagnosis, and thereby symptoms become a pathway through which a person becomes a patient.(9) Symptoms, however, can be difficult to explain and doctors may focus solely on relieving them.(9, 10) Additionally, diagnoses are not always helpful in explaining symptom experiences,(11) and having one diagnosis increases the risk of being diagnosed with other diseases.(12) Patients with multimorbidity report a considerable symptom burden (5, 13) and more focus on symptom management in multimorbidity has been suggested.(14) Therefore, an understanding of the relationship between diagnoses and symptom burden is warranted, and especially an understanding of how symptom burden is experienced when diagnoses occur in multiples, ie multimorbidity. The aim of this study was to explore symptom burden in patients with one of ten morbidities compared with symptom burden in patients with multimorbidity. We hypothesised that symptom burden in multimorbidity was additive, ie that symptoms in patients with multimorbidity was equivalent to the sum of the symptoms attributable to the single morbidities.

## Methods

### *Study design and population.*

The study was a longitudinal cohort study. Participants were from the Danish Symptom Cohort, a population-based study conducted in Denmark in June-December, 2012. People invited to participate in the study were living in Denmark on 1<sup>st</sup> January, 2012 (baseline). Of 100,000 adults ( $\geq 20$  years) randomly selected from the general Danish population, 95,253 were eligible and invited to participate (Figure 1). Of these, 49,706 (52.2%) completed the study questionnaire (Supplementary File 1).(15)

All Danish born and immigrant populations in Denmark have a unique personal identification number in the Danish Civil Registration System.(16) The register contains information about age, sex, vital status, etc, and enables information from different Danish registries to be

1  
2  
3 linked. Information on diagnoses leading to either inpatient or outpatient care in the hospital  
4 sector was collected from the Danish National Patient Register,(17) the Danish Cancer  
5 Registry,(18) and the Danish Psychiatric Central Research Register.(19) Thus, only diagnoses  
6 from secondary care were included in the study. Information on education,(20) work  
7 status,(21) family income,(22) assets (banks, stocks, bonds, and housing),(22) degree of  
8 urbanisation, and cohabitation status was obtained from the nationwide registries at baseline.  
9  
10  
11  
12  
13  
14

### 15 *Symptom data*

16  
17 The Danish Symptom Cohort was established to investigate symptom experience in the  
18 general population and healthcare-seeking in relation to general practice. According to the  
19 random sample selected from the Danish population, the cohort included both healthy people  
20 and people with diseases. Several articles have been published with data from the cohort.(23-  
21 25) The focus of the present study was symptom burden in people with multimorbidity and  
22 variables for the study was selected accordingly.(23) The median age of the participants in  
23 the Danish Symptom Cohort was 52 years (IQR 40-64) and for non-participants it was 50  
24 years (IQR 36-67). The respondents were reasonably representative of the study sample, but  
25 non-responders were more often men, unmarried, with lower education, lower income level,  
26 and with a generally looser attachment to the labour market.  
27  
28  
29  
30  
31  
32  
33  
34

35 The survey consisted of a web-based questionnaire supported by a telephone interviewer if  
36 warranted. The questionnaire was electronic and designed so that it was not possible to skip  
37 items, and therefore there were no missing values for those who completed it. The process of  
38 developing the questionnaire has been described by Rasmussen et al.(15) The questionnaire  
39 had five domains: three about experience of symptoms and how participants acted upon them,  
40 and two about factors related to symptom experience and healthcare-seeking behaviour  
41 (Supplementary File 1). The questionnaire included 38 general symptoms, as well as two  
42 specific symptoms for men and four for women (44 symptoms in total). The first sentence in  
43 the questionnaire was: “We are interested to hear if you have experienced any bodily  
44 sensations, symptoms, or discomfort within the last four weeks”. For the general symptoms  
45 the following phrase was used: “Have you experienced any of these within the last 4 weeks?”  
46 Respondents had the opportunity to tick more than one box in a list presenting the 38 general  
47 symptoms (Supplementary File 1). Eight symptoms were excluded in the present analyses as  
48 six of them were gender-specific (as mentioned above) and would have made comparisons  
49 between men and women difficult, and the two symptoms “coughing up blood” and “blood in  
50  
51  
52  
53  
54  
55  
56  
57  
58  
59  
60

1  
2  
3 vomit” had low prevalence in the data. Therefore, we included 36 symptoms in the analyses  
4 (Supplementary File 2).

5  
6 The questionnaire also included questions about how each symptom affected usual daily  
7 activities (impairment score) and the participant’s concern about each symptom (worry  
8 score): “Within the last 4 weeks, to what extent did you experience that the following  
9 symptoms or discomfort interfered with your usual daily activities?”; and “Within the last 4  
10 weeks, to what extent were you concerned about the following symptoms or discomfort?” For  
11 each symptom, there were five response categories: “not at all”, “slightly”, “moderate”,  
12 “quite a bit”, and “extremely”. The response categories were transformed in to a numeric  
13 scale (0-4) where the experience rated 4 is worse than the experience rated 1.  
14  
15  
16  
17  
18  
19  
20  
21

### 22 *Symptom burden*

23  
24 Three components defined symptom burden: 1) number of symptoms (*number score* 0-36);  
25 how symptoms affect usual daily activities (*impairment score* 0-4 per symptom reported, and  
26 concern about the symptoms (*worry score* 0-4 per symptom reported).  
27  
28  
29

30 For the impairment score and the worry score, we included the symptom with the highest  
31 score in the analyses, eg if a patient scores 3 for tiredness, and scores 1 for dizziness their  
32 overall score is 3. This is because we anticipated that the most burdensome symptoms affect  
33 quality of life more heavily than a number of minor symptoms.(26)  
34  
35  
36

### 37 *Multimorbidity*

38  
39 Information on diagnoses was retrieved from the nationwide health registries in the 10-year  
40 period preceding baseline (1st January, 2002-31st December, 2011). Participants were  
41 excluded if they had not been living continuously in Denmark during this 10-year period.  
42 Chronic disease diagnoses were grouped into ten domains: LUNG, MUSCULOSKELETAL,  
43 ENDOCRINE, MENTAL HEALTH, CANCER, NEUROLOGICAL,  
44 GASTROINTESTINAL, CARDIOVASCULAR, GENITOURINARY and SENSORY. In  
45 each domain, relevant diagnoses from the International Classification of Diseases, 10th  
46 edition (ICD-10) were included (Supplementary File 3). Morbidity is defined as having a  
47 diagnosis from one domain and multimorbidity is defined as having a diagnosis from two or  
48 more different domains.(27) This definition rests on the assumption that it is more complex  
49 and realistic from a physiological and organisational point of view if the patient is living with  
50 diagnoses from different domains of the body.(27) Often two chronic diagnoses refer to the  
51 same disease entity, eg myocardial infarction and congestive heart failure. Therefore, our  
52  
53  
54  
55  
56  
57  
58  
59  
60

1  
2  
3 definition of multimorbidity relates more closely to how health care is organised and it grasps  
4 some aspects of complexity to a greater extent than counting individual diagnoses  
5 (Supplementary File 3). People who do not have any of the diagnoses included in the ten  
6 domains were considered to have no morbidity.  
7  
8  
9

### 10 *Statistical analysis*

11 Symptom burden in people with a single morbidity and multimorbidity was explored using  
12 multivariate analyses adjusted for age, sex, socioeconomic status (highest completed  
13 education, income, assets, and work status), degree of urbanisation, cohabitation status,  
14 smoking, and alcohol consumption. Excess symptom burden for people with multimorbidity  
15 (combinations of two diagnosis domains) was assessed in multivariable linear regression  
16 models. For each of the three measures of symptom burden (number of symptoms,  
17 impairment score, and worry score) the  $(10 \times 9) / 2 = 45$  regression coefficients pertaining to the  
18 two-way interactions between diagnosis domains were retained from a multivariable linear  
19 regression on all combinations of diagnosis domains, adjusted for the same covariates as  
20 mentioned above. These coefficients were directly interpreted as the synergy effect, ie excess  
21 symptom burden associated with having diagnoses from two diagnosis domains relative to  
22 the sum of the symptom burden associated with having a diagnosis from the diagnosis  
23 domains individually. Analyses were performed using SAS, version 9.4 (SAS Institute Inc.,  
24 Cary, NC, USA).  
25  
26  
27  
28  
29  
30  
31  
32  
33  
34  
35  
36

### 37 *Patient and public involvement*

38 No patients, nor any other members of the public, were involved in designing, conducting, or  
39 reporting this study.  
40  
41  
42

### 43 *Ethical approval*

44 The Danish Symptom Cohort study was approved by the Ethics Committee and the National  
45 Board of Health. Informed consent was obtained from all participants. The Danish Data  
46 Protection Agency approved the Danish Symptom Cohort (journal number 2011-41-6651)  
47 and approved linkage with other registers (journal number 2015-231-0149). For the present  
48 analyses, the Danish Data Protection Agency, Statens Serum Institut and Statistics Denmark  
49 approved the use of register data. Administrative register data were anonymised, and re-  
50 approval from the Ethics Committee was not needed, nor did we need additional informed  
51 consent from the participants.  
52  
53  
54  
55  
56  
57  
58  
59  
60



## Results

The study sample consisted of 47,452 people  $\geq 20$  years old (Figure 1) out of which 17,227 (36.3%) had a single morbidity and 5,652 (11.9%) had multimorbidity (Table 1). Overall, 43,228 (91.1%) reported symptoms (Table 1 and Supplementary File 4), with 92.8% of people with a single morbidity or multimorbidity reporting at least one symptom, and 90.2% of people without morbidity reporting at least one symptom. On average, the participants experienced 4.8-7.4 symptoms depending on morbidities within the last four weeks (Supplementary Table A).

For peer review only

**Table 1.** Baseline characteristics stratified for the various morbidity domains.

| Baseline characteristics*              | Total        | No diagnosis | LUNG        | MUSCULO SKELETAL | ENDO        | MENTAL HEALTH | CANCER      | NEURO       | GASTRO      | HEART       | KIDNEY     | SENSORY     |
|----------------------------------------|--------------|--------------|-------------|------------------|-------------|---------------|-------------|-------------|-------------|-------------|------------|-------------|
|                                        | n (%)        | n (%)        | n (%)       | n (%)            | n (%)       | n (%)         | n (%)       | n (%)       | n (%)       | n (%)       | n (%)      | n (%)       |
| <b>Total</b>                           | 47452 (100)  | 30225 (63.7) | 1595 (3.4)  | 6957 (14.7)      | 2214 (4.7)  | 471 (1.0)     | 2457 (5.2)  | 1679 (3.5)  | 2202 (4.6)  | 3878 (8.2)  | 1067 (2.3) | 2614 (5.5)  |
| <b>Sex</b>                             |              |              |             |                  |             |               |             |             |             |             |            |             |
| Male                                   | 22278 (47.0) | 14627 (48.4) | 699 (43.8)  | 2759 (39.7)      | 969 (43.8)  | 299 (63.5)    | 882 (35.9)  | 787 (46.9)  | 922 (41.9)  | 2329 (60.1) | 208 (19.5) | 1427 (54.6) |
| <b>Age</b>                             |              |              |             |                  |             |               |             |             |             |             |            |             |
| 20-39                                  | 11362 (23.9) | 9266 (30.7)  | 234 (14.7)  | 607 (8.7)        | 220 (9.9)   | 35 (7.4)      | 366 (14.9)  | 244 (14.5)  | 373 (16.9)  | 135 (3.5)   | 144 (13.5) | 113 (4.3)   |
| 40-64                                  | 25269 (53.3) | 16493 (54.6) | 747 (46.8)  | 3700 (53.2)      | 1148 (51.9) | 277 (58.8)    | 1078 (43.9) | 801 (47.7)  | 1193 (54.2) | 1590 (41.0) | 577 (54.1) | 939 (35.9)  |
| 65-79                                  | 9602 (20.2)  | 4149 (13.7)  | 524 (32.9)  | 2287 (32.9)      | 734 (33.2)  | 129 (27.4)    | 871 (35.4)  | 523 (31.1)  | 564 (25.6)  | 1765 (45.5) | 284 (26.6) | 1194 (45.7) |
| >80                                    | 1219 (2.6)   | 317 (1.0)    | 90 (5.6)    | 363 (5.2)        | 112 (5.1)   | 30 (6.4)      | 142 (5.8)   | 111 (6.6)   | 72 (3.3)    | 388 (10.0)  | 62 (5.8)   | 368 (14.1)  |
| <b>MM (≥2 diagnosis groups)</b>        |              |              |             |                  |             |               |             |             |             |             |            |             |
| Yes                                    | 5652 (11.9)  |              | 953 (59.7)  | 3127 (44.9)      | 1351 (61.0) | 309 (65.6)    | 1183 (48.1) | 997 (59.4)  | 1213 (55.1) | 2332 (60.1) | 613 (57.5) | 1481 (56.7) |
| <b>Highest education</b>               |              |              |             |                  |             |               |             |             |             |             |            |             |
| Primary school                         | 9374 (19.8)  | 5153 (17.0)  | 431 (27.0)  | 1790 (25.7)      | 609 (27.5)  | 152 (32.3)    | 568 (23.1)  | 451 (26.9)  | 561 (25.5)  | 1067 (27.5) | 280 (26.2) | 682 (26.1)  |
| Secondary school <sup>1</sup>          | 21635 (45.6) | 14039 (46.4) | 721 (45.2)  | 3095 (44.5)      | 1009 (45.6) | 196 (41.6)    | 1046 (42.6) | 738 (44.0)  | 1030 (46.8) | 1670 (43.1) | 440 (41.2) | 1118 (42.8) |
| Higher educations <sup>2</sup>         | 15869 (33.4) | 10690 (35.4) | 421 (26.4)  | 1989 (28.6)      | 565 (25.5)  | 110 (23.4)    | 815 (33.2)  | 465 (27.7)  | 591 (26.8)  | 1066 (27.5) | 340 (31.9) | 753 (28.8)  |
| None registered                        | 574 (1.2)    | 343 (1.1)    | 22 (1.4)    | 83 (1.2)         | 31 (1.4)    | 13 (2.8)      | 28 (1.1)    | 25 (1.5)    | 20 (0.9)    | 75 (1.9)    | 7 (0.7)    | 61 (2.3)    |
| <b>Income<sup>3</sup></b>              |              |              |             |                  |             |               |             |             |             |             |            |             |
| (low)                                  | 11218 (23.6) | 6637 (22.0)  | 536 (33.6)  | 1859 (26.7)      | 689 (31.1)  | 203 (43.1)    | 640 (26.0)  | 496 (29.5)  | 591 (26.8)  | 1187 (30.6) | 273 (25.6) | 796 (30.5)  |
| (middle)                               | 12092 (25.5) | 7450 (24.6)  | 441 (27.6)  | 1902 (27.3)      | 605 (27.3)  | 134 (28.5)    | 661 (26.9)  | 466 (27.8)  | 613 (27.8)  | 1044 (26.9) | 308 (28.9) | 734 (28.1)  |
| (middle)                               | 12056 (25.4) | 8004 (26.5)  | 317 (19.9)  | 1631 (23.4)      | 484 (21.9)  | 79 (16.8)     | 566 (23.0)  | 377 (22.5)  | 544 (24.7)  | 825 (21.3)  | 254 (23.8) | 536 (20.5)  |
| (high)                                 | 12086 (25.5) | 8134 (26.9)  | 301 (18.9)  | 1565 (22.5)      | 436 (19.7)  | 55 (11.7)     | 590 (24.0)  | 340 (20.3)  | 454 (20.6)  | 822 (21.2)  | 232 (21.7) | 548 (21.0)  |
| <b>Working status</b>                  |              |              |             |                  |             |               |             |             |             |             |            |             |
| Working                                | 29205 (61.6) | 21311 (70.5) | 660 (41.4)  | 2924 (42.0)      | 892 (40.3)  | 133 (28.2)    | 1125 (45.8) | 640 (38.1)  | 1097 (49.8) | 1248 (32.2) | 523 (49.0) | 766 (29.3)  |
| Out of workforce <sup>4</sup>          | 6130 (12.9)  | 3766 (12.5)  | 274 (17.2)  | 1081 (15.5)      | 361 (16.3)  | 155 (32.9)    | 249 (10.1)  | 361 (21.5)  | 398 (18.1)  | 386 (10.0)  | 172 (16.1) | 228 (8.7)   |
| Pensioners                             | 12117 (25.5) | 5148 (17.0)  | 661 (41.4)  | 2952 (42.4)      | 961 (43.4)  | 183 (38.9)    | 1083 (44.1) | 678 (40.4)  | 707 (32.1)  | 2244 (57.9) | 372 (34.9) | 1620 (62.0) |
| <b>Asset<sup>5</sup></b>               |              |              |             |                  |             |               |             |             |             |             |            |             |
| (no asset)                             | 15695 (33.1) | 10543 (34.9) | 524 (32.9)  | 2017 (29.0)      | 717 (32.4)  | 196 (41.6)    | 695 (28.3)  | 516 (30.7)  | 771 (35.0)  | 960 (24.8)  | 357 (33.5) | 511 (19.5)  |
| (low asset)                            | 15747 (33.2) | 10131 (33.5) | 550 (34.5)  | 2351 (33.8)      | 783 (35.4)  | 163 (34.6)    | 788 (32.1)  | 562 (33.5)  | 751 (34.1)  | 1210 (31.2) | 391 (36.6) | 838 (32.1)  |
| (high asset)                           | 16010 (33.7) | 9551 (31.6)  | 521 (32.7)  | 2589 (37.2)      | 714 (32.2)  | 112 (23.8)    | 974 (39.6)  | 601 (35.8)  | 680 (30.9)  | 1708 (44.0) | 319 (29.9) | 1265 (48.4) |
| <b>Urbanisation degree<sup>6</sup></b> |              |              |             |                  |             |               |             |             |             |             |            |             |
| Rural                                  | 16621 (35.0) | 10303 (34.1) | 552 (34.6)  | 2581 (37.1)      | 803 (36.3)  | 157 (33.3)    | 863 (35.1)  | 605 (36.0)  | 879 (39.9)  | 1490 (38.4) | 402 (37.7) | 945 (36.2)  |
| Small town                             | 17346 (36.6) | 10981 (36.3) | 559 (35.0)  | 2548 (36.6)      | 763 (34.5)  | 148 (31.4)    | 940 (38.3)  | 596 (35.5)  | 804 (36.5)  | 1481 (38.2) | 392 (36.7) | 995 (38.1)  |
| Capital city                           | 13485 (28.4) | 8941 (29.6)  | 484 (30.3)  | 1828 (26.3)      | 648 (29.3)  | 166 (35.2)    | 654 (26.6)  | 478 (28.5)  | 519 (23.6)  | 907 (23.4)  | 273 (25.6) | 674 (25.8)  |
| <b>Cohabiting</b>                      |              |              |             |                  |             |               |             |             |             |             |            |             |
| Yes                                    | 35614 (75.1) | 22830 (75.5) | 1098 (68.8) | 5189 (74.6)      | 1601 (72.3) | 239 (50.7)    | 1822 (74.2) | 1194 (71.1) | 1633 (74.2) | 2899 (74.8) | 791 (74.1) | 1858 (71.1) |
| <b>Smoking</b>                         |              |              |             |                  |             |               |             |             |             |             |            |             |
| Yes, current                           | 9860 (20.8)  | 6384 (21.1)  | 345 (21.6)  | 1390 (20.0)      | 470 (21.2)  | 223 (47.3)    | 480 (19.5)  | 362 (21.6)  | 463 (21.0)  | 663 (17.1)  | 206 (19.3) | 442 (16.9)  |
| Yes, former                            | 15030 (31.7) | 8493 (28.1)  | 656 (41.1)  | 2605 (37.4)      | 903 (40.8)  | 134 (28.5)    | 1026 (41.8) | 595 (35.4)  | 789 (35.8)  | 1766 (45.5) | 392 (36.7) | 1102 (42.2) |

1  
2  
3  
4  
5  
6  
7  
8  
9  
10  
11  
12  
13  
14  
15  
16  
17  
18  
19  
20  
21  
22  
23  
24  
25  
26  
27  
28  
29  
30  
31  
32  
33  
34  
35  
36  
37  
38  
39  
40  
41  
42  
43  
44  
45  
46

|                                  |              |              |            |             |             |            |             |             |             |             |            |             |
|----------------------------------|--------------|--------------|------------|-------------|-------------|------------|-------------|-------------|-------------|-------------|------------|-------------|
| 3 Never                          | 20754 (43.7) | 14385 (47.6) | 488 (30.6) | 2641 (38.0) | 734 (33.2)  | 76 (16.1)  | 821 (33.4)  | 617 (36.7)  | 842 (38.2)  | 1236 (31.9) | 404 (37.9) | 910 (34.8)  |
| 4 No answer                      | 1808 (3.8)   | 963 (3.2)    | 106 (6.6)  | 321 (4.6)   | 107 (4.8)   | 38 (8.1)   | 130 (5.3)   | 105 (6.3)   | 108 (4.9)   | 213 (5.5)   | 65 (6.1)   | 160 (6.1)   |
| 5 <b>Alcohol</b>                 |              |              |            |             |             |            |             |             |             |             |            |             |
| 6 <b>consumption<sup>7</sup></b> |              |              |            |             |             |            |             |             |             |             |            |             |
| 7 1-7 units/week                 | 30261 (63.8) | 19679 (65.1) | 927 (58.1) | 4326 (62.2) | 1361 (61.5) | 140 (29.7) | 1538 (62.6) | 1014 (60.4) | 1396 (63.4) | 2239 (57.7) | 690 (64.7) | 1515 (58.0) |
| 8 8-21 units/week                | 10320 (21.8) | 6696 (22.2)  | 309 (19.4) | 1456 (20.9) | 371 (16.8)  | 104 (22.1) | 514 (20.9)  | 309 (18.4)  | 373 (16.9)  | 917 (23.6)  | 171 (16.0) | 670 (25.6)  |
| 9 >21 units/week                 | 1669 (3.5)   | 1058 (3.5)   | 60 (3.8)   | 218 (3.1)   | 66 (3.9)    | 61 (13.0)  | 82 (3.3)    | 48 (2.9)    | 66 (3.0)    | 175 (4.5)   | 15 (1.4)   | 107 (4.1)   |
| 10 Never                         | 3381 (7.1)   | 1820 (6.0)   | 192 (12.0) | 635 (9.1)   | 308 (13.9)  | 128 (27.2) | 192 (7.8)   | 203 (12.1)  | 258 (11.7)  | 334 (8.6)   | 126 (11.8) | 162 (6.2)   |
| 10 No answer                     | 1821 (3.8)   | 972 (3.2)    | 107 (6.7)  | 322 (4.6)   | 108 (4.9)   | 38 (8.1)   | 131 (5.3)   | 105 (6.3)   | 109 (5.0)   | 213 (5.5)   | 65 (6.1)   | 160 (6.1)   |

\*At baseline 1 January, 2012

<sup>1</sup> Secondary school: secondary school, high school and higher-level vocational studies.

<sup>2</sup> Higher educations: short and medium, higher education or college diploma, university degree (bachelor or master), doctoral degree.

<sup>3</sup> Income: divided in quartiles.

<sup>4</sup> Out of workforce: unemployed, student, apprentice or intern, or incapacity benefits.

<sup>5</sup> Asset: divided in tertiles.

<sup>6</sup> Rural: at least 50 % of the population in the municipality lives in a thinly populated area. Small town: Intermediate density area. Less than 50 % of the population lives in a densely populated area and less than 50 % of the population lives in a thinly populated area. Capital: At least 50 % of the population lives in a densely populated area.

<sup>7</sup> Moderate: 0-7 units/week women, 0-14 units/week men. High: >7 units/week for women, >14 units/week men, 1 unit=4 cl alcohol 40% or 1 glass of wine or 1 beer 33 cl 4.5%.

LUNG = lung diagnoses. MUSCULOSKELETAL = musculoskeletal diagnoses. ENDO = endocrine diagnoses. MENTAL HEALTH= psychiatric diagnoses. CANCER = cancer diagnoses. NEURO = neurological diagnoses. GASTRO = gastrointestinal diagnoses. HEART = cardiovascular diagnoses. KIDNEY = genitourinary diagnoses. SENSORY = sensory organ diagnoses

For peer review only

1  
2  
3 *Morbidity and symptom burden*  
4

5 Participants without morbidity reported 4.77 symptoms (SD 3.92) on average (Supplementary  
6 Table A). The more morbidities a participant had, the more symptoms they reported. In  
7 multivariable analysis adjusted for confounders, each extra morbidity was associated with  
8 approximately one extra symptom (Table 2).  
9  
10  
11  
12  
13  
14  
15  
16  
17  
18  
19  
20  
21  
22  
23  
24  
25  
26  
27  
28  
29  
30  
31  
32  
33  
34  
35  
36  
37  
38  
39  
40  
41  
42  
43  
44  
45  
46  
47  
48  
49  
50  
51  
52  
53  
54  
55  
56  
57  
58  
59  
60

For peer review only

**Table 2.** The increase in mean symptom burden with the number of morbidity domains.

|                                                                    | Number of morbidity domains (out of 10) |                       |                       |                       |                       |                       |                       |                        |
|--------------------------------------------------------------------|-----------------------------------------|-----------------------|-----------------------|-----------------------|-----------------------|-----------------------|-----------------------|------------------------|
|                                                                    | 0<br><i>(n=30225)</i>                   | 1<br><i>(n=11575)</i> | 2<br><i>(n=3963)</i>  | 3<br><i>(n=1243)</i>  | 4<br><i>(n=350)</i>   | 5<br><i>(n=76)</i>    | 6<br><i>(n=16)</i>    | 7<br><i>(n=4)</i>      |
| <b>Number of symptoms</b>                                          |                                         |                       |                       |                       |                       |                       |                       |                        |
| Mean (SD)                                                          | 4.77 (3.92)                             | 5.50 (4.34)           | 6.29 (4.72)           | 7.32 (4.88)           | 8.16 (5.31)           | 9.64 (5.91)           | 11.44 (6.11)          | 7.50 (5.20)            |
| Mean difference (95%CI) with 0 symptoms, adjusted analysis         | (ref)                                   | 0.95<br>(0.86 ; 1.03) | 1.87<br>(1.73 ; 2.01) | 2.89<br>(2.66 ; 3.12) | 3.70<br>(3.28 ; 4.12) | 5.51<br>(4.61 ; 6.41) | 6.61<br>(4.67 ; 8.54) | 1.96<br>(-1.90 ; 5.81) |
| <b>Interference with usual daily activities (impairment score)</b> |                                         |                       |                       |                       |                       |                       |                       |                        |
| Mean (SD)                                                          | 2.74 (1.46)                             | 3.04 (1.48)           | 3.30 (1.47)           | 3.73 (1.33)           | 3.83 (1.32)           | 4.08 (1.14)           | 4.07 (1.33)           | 4.50 (0.58)            |
| Mean difference (95%CI) with 0 symptoms, adjusted analysis         | (ref)                                   | 0.36<br>(0.32 ; 0.39) | 0.65<br>(0.60 ; 0.70) | 1.06<br>(0.98 ; 1.14) | 1.15<br>(1.00 ; 1.31) | 1.47<br>(1.15 ; 1.80) | 1.28<br>(0.57 ; 2.00) | 1.50<br>(0.12 ; 2.89)  |
| <b>Concern about symptoms (worry score)</b>                        |                                         |                       |                       |                       |                       |                       |                       |                        |
| Mean (SD)                                                          | 2.16 (1.38)                             | 2.49 (1.46)           | 2.77 (1.51)           | 3.20 (1.48)           | 3.27 (1.47)           | 3.67 (1.34)           | 3.80 (1.37)           | 3.75 (1.50)            |
| Mean difference (95%CI) with 0 symptoms, adjusted analysis         | (ref)                                   | 0.34<br>(0.31 ; 0.37) | 0.62<br>(0.57 ; 0.66) | 1.02<br>(0.94 ; 1.10) | 1.07<br>(0.92 ; 1.22) | 1.52<br>(1.20 ; 1.85) | 1.50<br>(0.80 ; 2.21) | 1.36<br>(0.00 ; 2.72)  |

For peer review only

1  
2  
3 Participants without morbidity reported a mean impairment score of 2.74 (SD1.46). The more  
4 morbidities a participant had, the higher their reported impairment score (Table 2). In  
5 multivariable analysis adjusted for confounders, each extra morbidity was associated with an  
6 approximately 0.35 higher impairment score (participants with one, two, or three morbidities)  
7 than participants without morbidity. However, in participants with four or more morbidities  
8 there was a levelling off in added impairment score with the number of morbidities (Table 2).  
9 Participants without morbidity reported a worry score of 2.16 (SD 1.38). The more  
10 morbidities, the higher the worry score participants reported (Table 2). In multivariable  
11 analysis adjusted for confounders, each extra morbidity was associated with an approximately  
12 0.34 higher worry score (participants with one, two, or three morbidities) than participants  
13 without morbidity. In participants with four or more morbidities, however, there was a  
14 levelling off in added worry score for each additional morbidity (Table 2).

#### 25 *Multimorbidity and interaction effect of symptom burden*

26 Participants with multimorbidity (confined to participants with two morbidities) were  
27 analysed for interaction effects regarding their number of symptoms, impairment score, and  
28 worry score. We did this to estimate if the symptom burden was additive (equivalent to the  
29 sum of two individual diagnoses), infra-additive (less than), or supra-additive (greater than)  
30 in specific combinations of multimorbidity.

31 The number of symptoms reported by participants with specific combinations of  
32 multimorbidity are outlined in Supplementary Tables A and B and depicted in Figure 2. In  
33 multivariable analyses adjusted for confounders the number of symptoms reported by the  
34 participants was additive in 37 out of 45 combinations of multimorbidity. The combinations  
35 LUNG-MENTAL HEALTH, CANCER-HEART and CANCER-SENSORY were associated  
36 with a supra-additive number of symptoms (Supplementary Table C). On the other hand, the  
37 combinations LUNG-MUSCULOSKELETAL, ENDO-MENTAL HEALTH, NEURO-  
38 MENTAL HEALTH, CANCER-KIDNEY and HEART-KIDNEY were associated with an  
39 infra-additive number of reported symptoms (Supplementary Table C).

40 Impairment scores as reported by participants with multimorbidity are outlined in  
41 Supplementary Tables D and E and depicted in Figure 3. In multivariable analyses adjusted  
42 for confounders the impairment score was additive in 41 out of 45 combinations of two  
43 morbidities. The combination CANCER-SENSORY was associated with a supra-additive  
44 impairment score. The combinations LUNG-GASTRO, CANCER-KIDNEY and HEART-  
45 KIDNEY were associated with an infra-additive impairment score.

1  
2  
3 Worry scores as reported by participants with multimorbidity are outlined in Supplementary  
4 Tables F and G and depicted in Figure 4. In multivariable analyses the worry score was  
5 additive in 36 out of 45 combinations of two morbidities. The combinations CANCER-  
6 MENTAL HEALTH, CANCER-NEURO and CANCER-SENSORY were associated with a  
7 supra-additive worry score. The combinations LUNG-MUSCULOSKELETAL, LUNG-  
8 KIDNEY, ENDO-KIDNEY, CANCER-KIDNEY, NEURO-KIDNEY and HEART-KIDNEY  
9 were associated with an infra-additive impairment score.  
10  
11  
12  
13  
14

## 15 16 **Discussion**

### 17 *Main findings*

18 Participants without morbidity reported a number of symptom experiences (mean 4.8, median  
19 4), and one extra symptom was added with each additional morbidity. Patients with a single  
20 morbidity, therefore, reported 5.8 symptoms, patients with three morbidities reported 7.8  
21 symptoms, and so forth. Thus, the number of symptoms was additive with one extra symptom  
22 for each extra morbidity.  
23  
24  
25  
26  
27

28 The same pattern was seen for how the symptoms interfered with the participants' daily  
29 activities and how much the participants were concerned about their symptoms. An  
30 impairment score (2.7) and a worry score (2.2) were reported by participants with no  
31 morbidity. Each morbidity added approximately 0.3 to the impairment and worry scores (up  
32 to three morbidities). Hereafter the impairment and worry scores leveled off to a slow  
33 increase with the number of morbidities (four, five, and six). Thus, the scores for how  
34 symptoms interfered with the participants' daily activities and how much the participants  
35 were concerned about their symptoms was relatively high in participants without morbidity,  
36 and the increase in impairment and worry scores were additive for every extra morbidity up  
37 to three. Hereafter, each morbidity (from four to seven morbidities) did not add much to the  
38 impairment and worry scores.  
39  
40  
41  
42  
43  
44  
45  
46  
47

48 In regard to symptom burden among specific combinations of multimorbidity, most  
49 combinations followed an additive pattern, i.e. the reported extra symptom burden in patients  
50 with multimorbidity was equivalent to the sum of the symptom burdens attributable to the  
51 individual morbidities. However, there were some exceptions to the overall additive pattern.  
52 Most notably, the combination SENSORY-CANCER where the symptom burden was supra-  
53 additive in all three components of symptom burden, and the combinations CANCER-  
54 KIDNEY and HEART-KIDNEY where all three components of symptom burden were infra-  
55 additive. Thus, SENSORY-CANCER seemed to be especially burdensome, whereas  
56  
57  
58  
59  
60

1  
2  
3 CANCER-KIDNEY and HEART-KIDNEY seemed to be less burdensome than other  
4 combinations of multimorbidity.  
5  
6

### 7 *Comparisons with existing literature*

9 In this study, many participants reported symptoms independent of morbidities. Since  
10 symptoms are a main source of information when a doctor establishes a diagnosis (9, 10) and  
11 symptoms are important mediators for healthcare-seeking behaviour (28) the high number of  
12 symptoms independent of morbidity could seem unexpected. However, it is earlier shown  
13 that only a limited part of experienced symptoms end up being presented to a doctor (23).  
14 Furthermore, it highlights the fact that symptoms to some degree are prerequisites of human  
15 condition (7) in contrast to diagnoses that are created by medicine.(10) However, symptoms  
16 have been shown to be frequent in the population (28, 29) and, when interviewed, a large  
17 number of people reported experiencing symptoms within a two week period.(30)  
18 Furthermore, it is reasonable to believe that symptom burden affects self-rated health,(31, 32)  
19 even though evidence suggests that it is not the symptom itself, but rather limitations on daily  
20 activities, worry, and treatment burden related to the symptom that affect patients most.(33)  
21 A person's self-rated health decreases with the number of chronic diseases they are living  
22 with, and this is most pronounced in younger and previously healthy people,(34) which is in  
23 line with our results.  
24  
25  
26  
27  
28  
29  
30  
31  
32  
33  
34  
35  
36

37 In this study, we found that the majority of multimorbidity combinations were additive and  
38 even had a levelling off effect. This could indicate that the definition of multimorbidity we  
39 used is clinically relevant, since the number of symptoms increases with the number of  
40 morbidities. While prognosis in multimorbidity is worse than could be predicted by adding  
41 the prognoses of individual diseases,(35) this is not the case for symptoms, according to the  
42 present study. This finding may, however, be explained by the overlap of symptoms between  
43 diagnoses. Another explanation could be that diagnoses are more likely to be made when  
44 patients have many contacts with the healthcare system.(12) This could particularly add to the  
45 amount of diagnoses made without symptoms. Furthermore, it is known that older people  
46 seem to adapt to chronic conditions with a lower influence on their self-rated health as a  
47 result.(35)  
48  
49  
50  
51  
52  
53  
54  
55  
56

57 This study shows that a mean of one new symptom is added for each morbidity, indicating  
58 that the symptom burden of patients with multimorbidity may be substantial. This may help  
59  
60



1  
2  
3 clinicians to understand why patients with multimorbidity struggle to recognise which  
4 symptoms to focus on (36) and also help us understand why patients with multimorbidity are  
5 sometimes overwhelmed by their symptom burden.(5, 13) With the number of morbidities  
6 they have to live with, multimorbidity can quickly become a complex issue for patients,(37)  
7 not only because of the burden of symptoms, but also because of the burden of treatment,(38)  
8 the organisational challenges,(38) and the demands from everyday life.(33)  
9  
10  
11  
12  
13  
14

15 In most combinations of multimorbidity, symptom burden was additive rather than supra-  
16 additive. However, there were a few exceptions, eg the multimorbidity combination sensory-  
17 cancer was supra-additive. Patients with multimorbidity combinations that included cancer  
18 reported a supra-additive symptom burden, especially regarding their worry score. Cancer has  
19 a certain status in the general population as something fatal and cancer alarm symptoms can  
20 act as a mediator for making contact with a doctor.(31)  
21  
22  
23  
24  
25

26 Participants with multimorbidity that included a kidney morbidity most often reported an  
27 infra-additive symptom burden, especially regarding their worry score. This could be  
28 explained by the fact that a kidney diagnosis is more likely to come from a laboratory test and  
29 general and often reported symptoms as e.g. tiredness. Furthermore, in the kidney domain of  
30 our definition of multimorbidity, incontinence was an important and frequent diagnosis, but  
31 not necessarily a worrying one.(39, 40)  
32  
33  
34  
35  
36  
37  
38  
39

#### 40 *Strengths and limitations*

41 The population-based cohort and high response rate are strengths of our study,(41) as well as  
42 the questionnaire containing a breadth of symptoms indicative of both serious and less  
43 harmful diseases, and the adjustments for several important factors. The relatively low  
44 prevalence of multimorbidity in this study compared to other studies can be explained by the  
45 definition based on ten groups of diagnoses from secondary care.(2, 42) The nationwide  
46 registers have high validity and they require a referral to secondary care, thus ensuring that  
47 the resulting diagnoses have a certain seriousness.(17, 18) In Denmark, primary care data on  
48 diagnoses are not available. However, we believe our broader definition, in contrast to simple  
49 disease counts (27, 43), better grasps the burden and complexity of multimorbidity.  
50  
51  
52  
53  
54  
55  
56  
57

58 The selection of symptoms in the questionnaire is not exhaustive and are not selected in order  
59 to represent the morbidity domains, however, they may show preference towards certain  
60

1  
2  
3 domains eg there are many urinary tract-related symptoms relative to only a few kidney  
4 diagnoses. This may induce artificial differences between diagnoses groups. However, this  
5 does not bias the synergy estimates. Furthermore, the presence of diagnoses from secondary  
6 care contacts does not allow us to obtain adequate data on diagnosis duration which could be  
7 of importance for symptom experience.(44) However, the time limit of four weeks in the  
8 questionnaire was used to focus on relevant symptoms, while they can still be recalled.(15)  
9 Finally, we cannot completely rule out that the multimorbidity combinations being supra- or  
10 infra-additive may be a result of multiple testing.  
11  
12  
13  
14  
15  
16  
17  
18  
19

### 20 *Implications*

21 It is well known that patients with multimorbidity face challenges in relation to their  
22 symptoms (5) and this study shows that symptom burden is, or rapidly becomes, substantial  
23 for these patients. Little is known about optimal management of symptoms (14) which  
24 underlines the need for increased attention to symptom burden among patients with  
25 multimorbidity. Initiatives such as patient dairies, describing the quality of disease  
26 management, paying attention to how patients explain their illness in order to understand  
27 their stories and life themes,(45) and patient involvement in deciding the agenda and  
28 achieving realistic goals, (33) are probably valuable for optimal management. In conclusion,  
29 patients with multimorbidity add approximately one extra symptom for each additional  
30 morbidity, and symptom burden in these patients is additive, ie equivalent to the sum of  
31 symptoms attributable to the individual morbidity.  
32  
33  
34  
35  
36  
37  
38  
39  
40  
41  
42  
43  
44  
45  
46

### 47 **Acknowledgements**

48 The authors are deeply grateful to Niels de Fine Olivarius for his dedicated support in this  
49 work.  
50  
51  
52  
53

54 **Contributions** TGW designed, wrote, and edited the manuscript, researched the data, and  
55 contributed to the discussion. VS and DN performed the analyses, researched the data,  
56 contributed to the discussion, and reviewed/edited the manuscript. RKR researched the data,  
57 contributed to the discussion, and reviewed/edited the manuscript. ADG, DJ, SR made  
58  
59  
60

1  
2  
3 important contributions to the discussion and content, and reviewed/edited the manuscript.  
4 All authors approved the final version of the manuscript. TGW, VS, and DN have full access  
5 to data and take full responsibility for the truthfulness in the data and in the data analyses.  
6  
7  
8 TGW is the guarantor of this work.  
9

## 10 11 12 **Funding**

13 The Health Foundation (Danish), grant number 19-B-0173.  
14  
15

16  
17 **Disclaimer** The study sponsors had no role in study design, data collection, and analysis or in  
18 writing the manuscript.  
19

## 20 21 22 **Competing interests**

23 None  
24  
25

## 26 27 28 **Patient consent for publication**

29 Not required  
30  
31

## 32 33 **Data availability statement**

34 Data may be obtained from a third party and are not publicly available. Data is stored at  
35 Statistics Denmark. To share data approvals are required from the Danish Data Protection  
36 Agency and The Danish Health Data Authority.  
37  
38  
39

## 40 41 42 **Copyright information**

43 I, the Submitting Author have the right to grant and do grant on behalf of all authors of the  
44 Work (as defined in the below author licence), an exclusive licence and/or a non-exclusive  
45 licence for contributions from authors who are: i) UK Crown employees; ii) where BMJ has  
46 agreed a CC-BY licence shall apply, and/or iii) in accordance with the terms applicable for  
47 US Federal Government officers or employees acting as part of their official duties; on a  
48 worldwide, perpetual, irrevocable, royalty-free basis to BMJ Publishing Group Ltd (“BMJ”)  
49 its licensees and where the relevant Journal is co-owned by BMJ to the co-owners of the  
50 Journal, to publish the Work in BMJ Open and any other BMJ products and to exploit all  
51 rights, as set out in our [licence](#).  
52  
53  
54  
55  
56  
57  
58  
59

60 The Submitting Author accepts and understands that any supply made under these terms is

1  
2  
3 made by BMJ to the Submitting Author unless you are acting as an employee on behalf of  
4 your employer or a postgraduate student of an affiliated institution which is paying any  
5 applicable article publishing charge (“APC”) for Open Access articles. Where the Submitting  
6 Author wishes to make the Work available on an Open Access basis (and intends to pay the  
7 relevant APC), the terms of reuse of such Open Access shall be governed by a Creative  
8 Commons licence – details of these licences and which [Creative Commons](#) licence will apply  
9 to this Work are set out in our licence referred to above.  
10  
11  
12  
13  
14  
15  
16  
17  
18  
19  
20  
21  
22  
23  
24  
25  
26  
27  
28  
29  
30  
31  
32  
33  
34  
35  
36  
37  
38  
39  
40  
41  
42  
43  
44  
45  
46  
47  
48  
49  
50  
51  
52  
53  
54  
55  
56  
57  
58  
59  
60

For peer review only

## Figure legends

**Figure 1.** Study population.

**Figure 2.** All (45) combinations of multimorbidity (two diagnosis groups) and the association with number of symptoms. *Syn*=synergy, the excess number of symptoms for multimorbidity, compared to the sum of symptoms from two people having the two morbidity domains individually. *Eff*=effect, the number of symptoms for the multimorbidity combination. *N*=number, the number of people with the multimorbidity combination. Effects with a *p*-value <0.05 are marked with \*.

**Figure 3.** All (45) combinations of multimorbidity (two diagnosis groups) and the association with influence on daily activities. *Syn*=synergy, the excess interference with usual daily activities score (from the symptom with the highest interference score, ranging 1-4 with 4 indicating the highest burden on usual daily activities) for multimorbidity, compared to the sum of the interference score from two people with the two morbidity domains individually. *Eff*=effect, the interference score for the multimorbidity combination. *N*=number, the number of people with the multimorbidity combination. Effects with a *p*-value <0.05 are marked with \*.

**Figure 4.** All (45) combinations of multimorbidity (two diagnosis groups) and the association with concern about symptoms. *Syn*=synergy, the excess concern score (from the symptom with the highest concern score, ranging 1-4 with 4 indicating most concern) for multimorbidity, compared to the sum of the concern score from two people with the two morbidity domains individually. *Eff*=effect, the concern score for the multimorbidity combination. *N*=number, the number of people with the multimorbidity combination. Effects with a *p*-value <0.05 are marked with \*.

## References

1. van den Akker M BF, Knottnerus JA. Comorbidity or multimorbidity: what's in a name? A review of literature. *Eur J Gen Pract.* 1996;2:65-70.
2. Barnett K, Mercer SW, Norbury M, et al. Epidemiology of multimorbidity and implications for health care, research, and medical education: a cross-sectional study. *Lancet.* 2012;380(9836):37-43.
3. Fortin M, Lapointe L, Hudon C, et al. Multimorbidity and quality of life in primary care: a systematic review. *Health Qual Life Outcomes.* 2004;2:51.
4. Willadsen TG, Siersma V, Nicolaisdottir DR, et al. Multimorbidity and mortality: A 15-year longitudinal registry-based nationwide Danish population study. *J Comorb.* 2018;8(1):2235042x18804063.
5. Petrillo LA, Ritchie CS. The challenges of symptom management for patients with multimorbidity in research and practice: a thematic review. *Prog Palliat Care.* 2016;24(5):262-7.
6. Nutzal A, Dahlhaus A, Fuchs A, et al. Self-rated health in multimorbid older general practice patients: a cross-sectional study in Germany. *BMC Fam Pract.* 2014;15:1.
7. Hay MC. Reading sensations: understanding the process of distinguishing 'fine' from 'sick'. *Transcult psychiatry.* 2008;45(2):198-229.
8. Macleod U, Mitchell ED, Burgess C, et al. Risk factors for delayed presentation and referral of symptomatic cancer: evidence for common cancers. *Br J Cancer.* 2009;101 Suppl 2:S92-S101.
9. Malterud K, Guassora AD, Graungaard AH, et al. Understanding medical symptoms: a conceptual review and analysis. *Theor Med Bioeth.* 2015;36(6):411-24.
10. Peterson MC, Holbrook JH, Von Hales D, et al. Contributions of the history, physical examination, and laboratory investigation in making medical diagnoses. *West J Med.* 1992;156(2):163-5.
11. Undeland M, Malterud K. The fibromyalgia diagnosis: hardly helpful for the patients? A qualitative focus group study. *Scand J Prim Health Care.* 2007;25(4):250-5.
12. Berkson J. Limitations of the application of fourfold table analysis to hospital data. *Int J Epidemiol.* 2014;43(2):511-5.
13. Eckerblad J, Theander K, Ekdahl AW, et al. Symptom trajectory and symptom burden in older people with multimorbidity, secondary outcome from the RCT AGE-FIT study. *J Adv Nurs.* 2016;72(11):2773-83.
14. Ritchie CS. Symptom burden: in need of more attention and more evidence. *JAMA Intern Med.* 2013;173(16):1541-2.

15. Rasmussen S, Sondergaard J, Larsen PV, et al. The Danish Symptom Cohort: Questionnaire and Feasibility in the Nationwide Study on Symptom Experience and Healthcare-Seeking among 100 000 Individuals. *Int J Family Med*. 2014;2014:187280.
16. Pedersen CB. The Danish Civil Registration System. *Scand J Public Health*. 2011;39(7 Suppl):22-5.
17. Lynge E, Sandegaard JL, Rebolj M. The Danish National Patient Register. *Scand J Public Health*. 2011;39(7 Suppl):30-3.
18. Gjerstorff ML. The Danish Cancer Registry. *Scand J Public Health*. 2011;39(7 Suppl):42-5.
19. Mors O, Perto GP, Mortensen PB. The Danish Psychiatric Central Research Register. *Scand J Public Health*. 2011;39(7 Suppl):54-7.
20. Jensen VM, Rasmussen AW. Danish Education Registers. *Scand J Public Health*. 2011;39(7 Suppl):91-4.
21. Petersson F, Baadsgaard M, Thygesen LC. Danish registers on personal labour market affiliation. *Scand J Public Health*. 2011;39(7 Suppl):95-8.
22. Baadsgaard M, Quitzau J. Danish registers on personal income and transfer payments. *Scand J Public Health*. 2011;39(7 Suppl):103-5.
23. Elnegaard S, Andersen RS, Pedersen AF, et al. Self-reported symptoms and healthcare seeking in the general population--exploring "The Symptom Iceberg". *BMC Public Health*. 2015;15:685.
24. Rasmussen S, Larsen PV, Svendsen RP, et al. Alarm symptoms of upper gastrointestinal cancer and contact to general practice--A population-based study. *Scand J Gastroenterol*. 2015;50(10):1268-75.
25. Jarbøl DE, Rasmussen S, Svendsen RP, et al. Barriers to contacting general practice with alarm symptoms of colorectal cancer: a population-based study. *Fam Pract*. 2018;35(4):399-405.
26. Elnegaard S, Pedersen AF, Sand Andersen R, et al. What triggers healthcare-seeking behaviour when experiencing a symptom? Results from a population-based survey. *BJGP Open*. 2017;1(2).
27. Willadsen TG, Bebe A, Koster-Rasmussen R, et al. The role of diseases, risk factors and symptoms in the definition of multimorbidity - a systematic review. *Scand J Prim Health Care*. 2016;34(2):112-21.
28. Elliott AM, McAteer A, Hannaford PC. Revisiting the symptom iceberg in today's primary care: results from a UK population survey. *BMC Fam Pract*. 2011;12:16.

- 1
  - 2
  - 3
  - 4
  - 5
  - 6
  - 7
  - 8
  - 9
  - 10
  - 11
  - 12
  - 13
  - 14
  - 15
  - 16
  - 17
  - 18
  - 19
  - 20
  - 21
  - 22
  - 23
  - 24
  - 25
  - 26
  - 27
  - 28
  - 29
  - 30
  - 31
  - 32
  - 33
  - 34
  - 35
  - 36
  - 37
  - 38
  - 39
  - 40
  - 41
  - 42
  - 43
  - 44
  - 45
  - 46
  - 47
  - 48
  - 49
  - 50
  - 51
  - 52
  - 53
  - 54
  - 55
  - 56
  - 57
  - 58
  - 59
  - 60
29. McAteer A, Elliott AM, Hannaford PC. Ascertaining the size of the symptom iceberg in a UK-wide community-based survey. *Br J Gen Pract.* 2011;61(582):e1-11.
30. Hollnagel H. 40-åriges helbred. En epidemiologisk undersøgelse af 40-årige kvinder og mænd i Københavns amt. (Health of 40-year olds. An epidemiological study of 40-year-old women and men in Copenhagen County). Doctoral Dissertation. Copenhagen: University of Copenhagen; 1985.
31. Jylha M. What is self-rated health and why does it predict mortality? Towards a unified conceptual model. *Soc Sci Med* (1982). 2009;69(3):307-16.
32. Waller G, Thalen P, Janlert U, et al. A cross-sectional and semantic investigation of self-rated health in the northern Sweden MONICA-study. *BMC Med Res Methodol.* 2012;12:154.
33. Ortenblad L, Meillier L, Jonsson AR. Multi-morbidity: A patient perspective on navigating the health care system and everyday life. *Chronic Illn.* 2017;0(0):1-12.
34. Idler EL, Benyamini Y. Self-rated health and mortality: a review of twenty-seven community studies. *J Health Soc Behav.* 1997;38(1):21-37.
35. Leinonen R, Heikkinen E, Jylha M. Changes in health, functional performance and activity predict changes in self-rated health: a 10-year follow-up study in older people. *Arch Gerontol Geriatr.* 2002;35(1):79-92.
36. Eckerblad J, Theander K, Ekdahl A, et al. Symptom burden in community-dwelling older people with multimorbidity: a cross-sectional study. *BMC Geriatr.* 2015;15(1):1.
37. Shippee ND, Shah ND, May CR, et al. Cumulative complexity: a functional, patient-centered model of patient complexity can improve research and practice. *J Clin Epidemiol.* 2012;65(10):1041-51.
38. Bower P, Macdonald W, Harkness E, et al. Multimorbidity, service organization and clinical decision making in primary care: a qualitative study. *FamPract.* 2011;28(5):579-87.
39. Rubach A, Balasubramaniam K, Elnegaard S, et al. Barriers to health care seeking with bothersome lower urinary tract symptoms among men-a nationwide study. *FamPract.* 2019;36(6):743-50.
40. Rubach A, Balasubramaniam K, Storsveen MM, et al. Healthcare-seeking with bothersome lower urinary tract symptoms among men in the Danish population: the impact of lifestyle and socioeconomic status. *Scand J Prim Health Care.* 2019;37(2):155-64.
41. Galea S, Tracy M. Participation Rates in Epidemiologic Studies. *Ann Epidemiol.* 2007;17(9):643-53.



- 1  
2  
3 42. Britt HC, Harrison CM, Miller GC, et al. Prevalence and patterns of multimorbidity in  
4 Australia. *Med J Aust.* 2008;189(2):72-7.  
5  
6  
7  
8 43. Diederichs C, Berger K, Bartels DB. The measurement of multiple chronic diseases--a  
9 systematic review on existing multimorbidity indices. *J Gerontol A Biol Sci Med Sci.*  
10 2011;66(3):301-11.  
11  
12 44. Eccles M, Ford GA, Duggan S, Steen N. Are postal questionnaire surveys of reported  
13 activity valid? An exploration using general practitioner management of hypertension  
14 in older people. *Br J Gen Pract.* 1999;49(438):35-8.  
15  
16 45. Kleinman. The Meaning of Symptoms and Disorders and The Personal and Social  
17 Meanings of Illness (Chapter 1 and 2). In: *The Illness Narratives: Suffering, Healing*  
18 *and the Human Condition* United States of America: Basic Books 1988. p. 3-55.  
19  
20  
21  
22  
23  
24  
25  
26  
27  
28  
29  
30  
31  
32  
33  
34  
35  
36  
37  
38  
39  
40  
41  
42  
43  
44  
45  
46  
47  
48  
49  
50  
51  
52  
53  
54  
55  
56  
57  
58  
59  
60

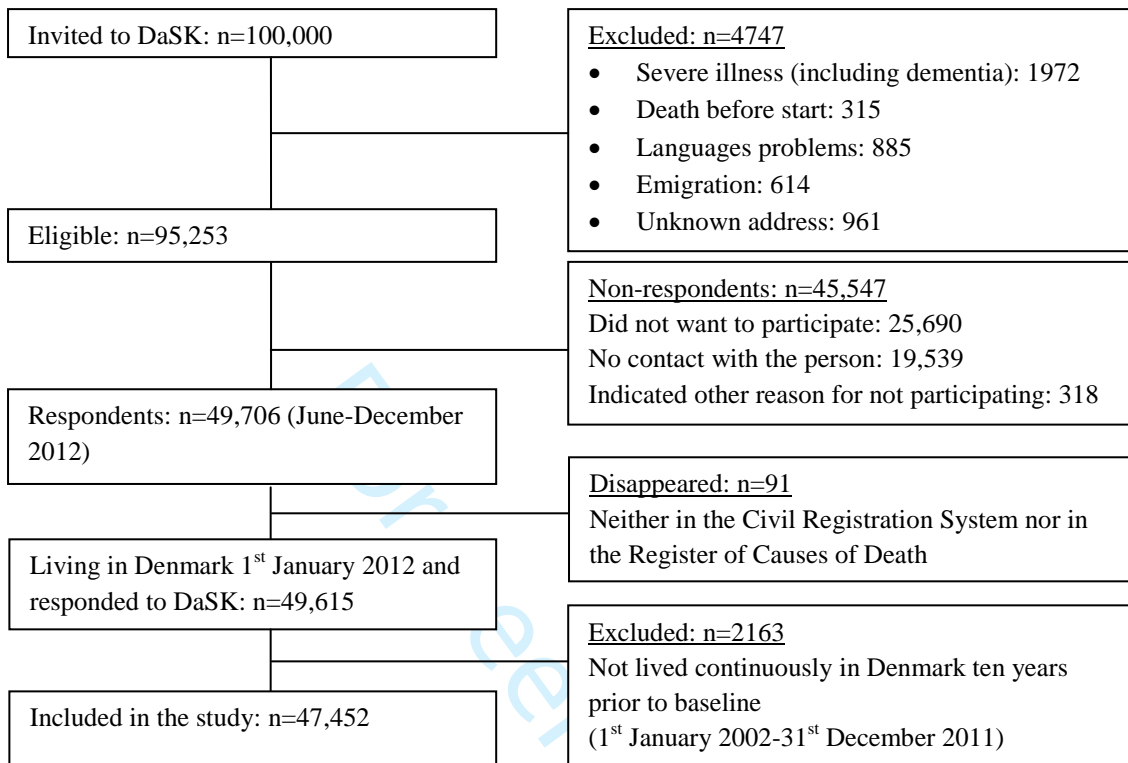

**Figure 1.** Danish symptom cohort study population.

1  
2  
3  
4  
5  
6  
7  
8  
9  
10  
11  
12  
13  
14  
15  
16  
17  
18  
19  
20  
21  
22  
23  
24  
25  
26  
27  
28  
29  
30  
31  
32  
33  
34  
35  
36  
37  
38  
39  
40  
41  
42  
43  
44  
45  
46  
47  
48  
49  
50  
51  
52  
53  
54  
55  
56  
57  
58  
59  
60

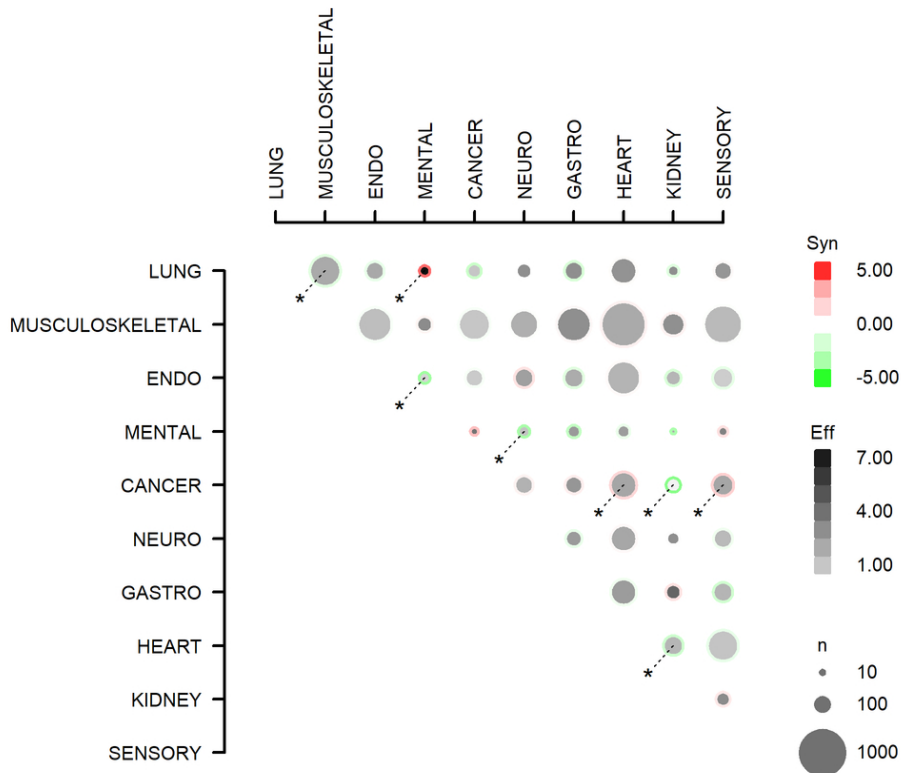

88x76mm (300 x 300 DPI)

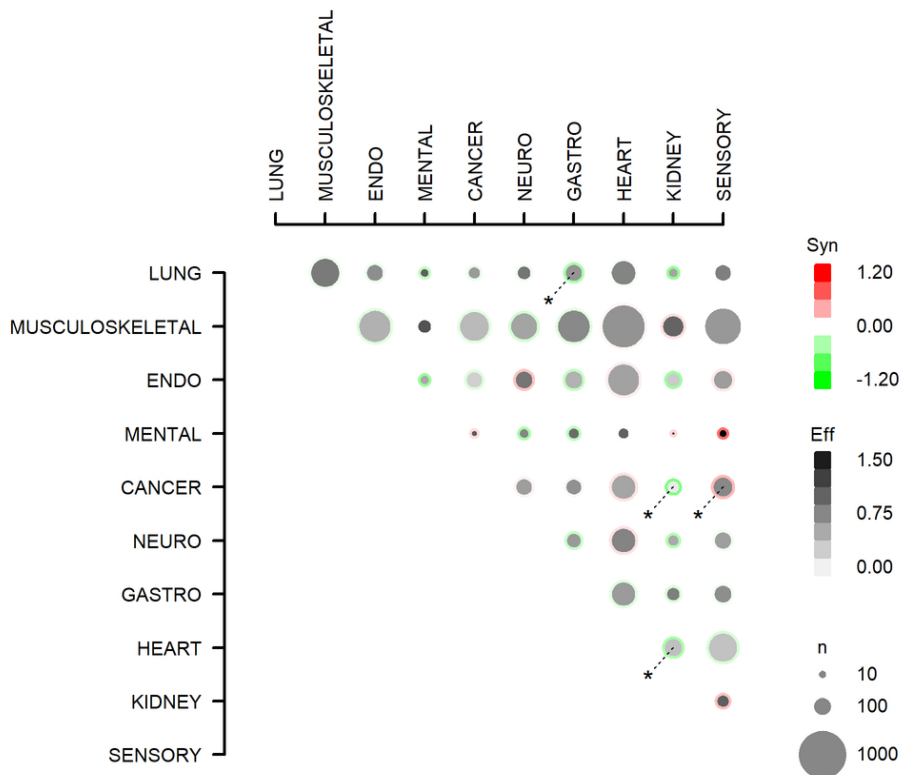

1  
2  
3  
4  
5  
6  
7  
8  
9  
10  
11  
12  
13  
14  
15  
16  
17  
18  
19  
20  
21  
22  
23  
24  
25  
26  
27  
28  
29  
30  
31  
32  
33  
34  
35  
36  
37  
38  
39  
40  
41  
42  
43  
44  
45  
46  
47  
48  
49  
50  
51  
52  
53  
54  
55  
56  
57  
58  
59  
60

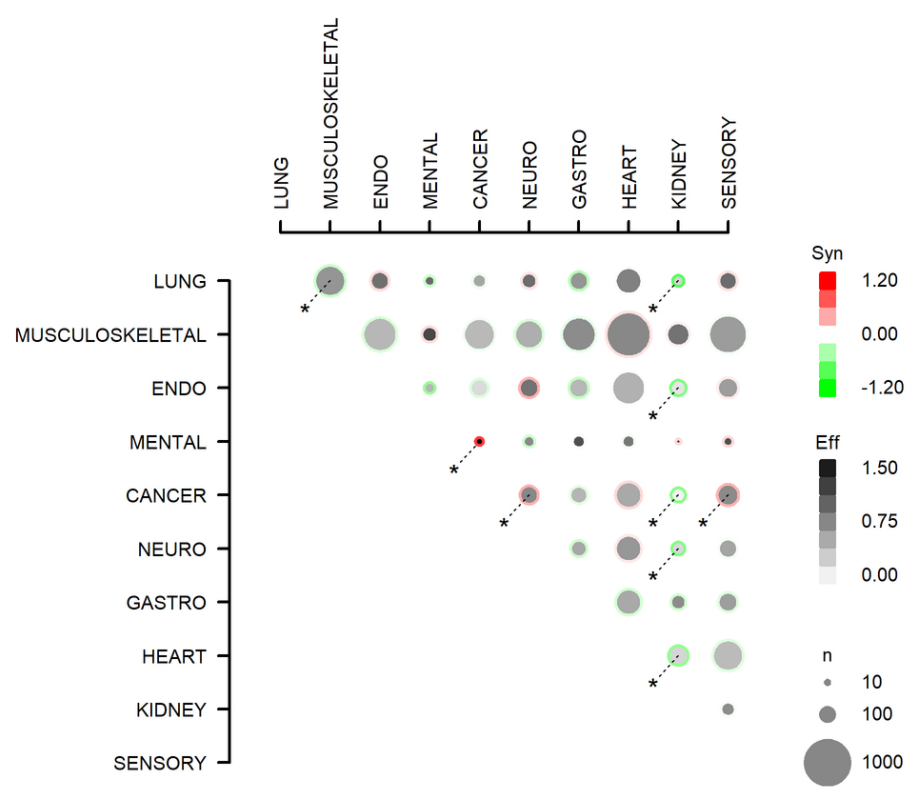

88x76mm (300 x 300 DPI)

## Supplementary File 1

### Welcome to the Danish Symptom Cohort – a survey about health, symptoms and healthcare-seeking

*The questionnaire was not available in hard copy, but for illustrative purposes it has been reproduced in this appendix.*

*In order to address sex specific items with minimal disturbance to respondents, the questionnaire was distributed in two different versions; one for males and another for females. In this appendix questions from both versions are included, and each of the sex specific questions is marked with explanatory captions in italic.*

*The web-based questionnaire contains several leaps based on answers provide by the respondents (marked with explanatory captions in italic).*

We appreciate that you will take the time to complete the questionnaire.

The questionnaire is to be used for the identification of a number of bodily sensations, symptom experiences and discomfort. You may find that some of the questions are similar. It is important that you answer them all anyway. You can also answer the questions, even if you feel perfectly healthy. There is a commentary box at the end of the questionnaire, in which you can note any additional remarks.

Should you get disrupted while answering the questionnaire, you can always log on again. The system automatically saves your answers. Simply use your personal logon information again, and you can continue the survey.

When completing the questionnaire, it is also possible to return to previously answered questions.

If you have any questions or experience problems while filling in the questionnaire, please feel free to contact us by e-mail: [dask@health.sdu.dk](mailto:dask@health.sdu.dk) or by phone: 29 71 44 24 weekdays between the hours 10:00-15:00 and 19:00-21:00.

For further information about the survey, please visit our website [www.sdu.dk/dask](http://www.sdu.dk/dask). Here you will also find answers to some frequently asked questions.

Completing the questionnaire will take approximately 20-30 min.

#### **Participant acceptance:**

I accept that my answers can be used for research, and I hereby give consent to obtain information from health records and medical records for research purposes. All my answers will be treated with the strictest confidence and used solely for research purposes. The responses will be used only in anonymous form. It is of course voluntary to participate, and I may at any time withdraw this consent.

The study was approved by the Danish Data Protection Agency, Science Ethics Committee and the Danish Health and Medicines Authority, and thus complies with current legal and ethical regulations.

**I accept the above**

We are interested to hear if you have experienced any bodily sensations, symptoms or discomfort within the last four weeks. Later you will be asked when you first experienced these, and how you reacted with regard to these experiences.

Have you within **the last 4 weeks** experienced any of these? (You may tick more than one box)

- Abdominal pain
- Nausea
- Repeated vomiting
- Blood in vomit
- Difficulty swallowing
  
- Abdominal bloating
- Increased waist circumference (trousers tighter than normal)
- Change in stool texture (i.e. having hard or lumpy stools, although you usually tend to have loose or watery stools or vice versa)
- Change in frequency of bowel movements (i.e. passing stools more or less frequently than usual)
  
- Rectal bleeding/Blood in stool
- Black shiny stools
- Frequent, loose or watery stools
- Hard and lumpy stools
  
- Tiredness
- Lack of energy
- Feeling unwell or sick
- Memory problems
- Concentration problems
- Weight loss of more than 2 kg without making an effort
  
- Coughing
- Coughing up blood
- Shortness of breath
- Hoarseness
  
- Dizziness
- Headache
- Back pain
- Swollen legs
- Loss of appetite
- Lump/swollen lymph node
- Fever
  
- That you need to urinate more often than usual
- That you have to get up to urinate at night
- Difficulty emptying the bladder completely when urinating

- Pain or burning sensation when urinating
- Urge to urinate so strong that you cannot make it to the toilet in time
- Involuntary urination (incontinence) during exertion, e.g. coughing, sneezing, lifting and exercise
- Involuntary urination (incontinence) without exertion and urge (leakage)
- Blood in urine

*Only for women:*

The next questions are about sexual relations. Some of the questions may seem private, but your response may contribute to a greater understanding of whether there is a correlation between sexual relations and symptoms or discomfort from the lower abdomen. If there are questions you do not wish to answer, simply tick the category "do not wish to answer."

Have you within the **last 4 weeks** experienced any of the following?

Pelvic pain

- Yes
- No
- I don't wish to answer

Vaginal bleeding after menopause (i.e. absence of menstrual periods for more than 12 months.)

- Not relevant, as I have not yet reached menopause
- Yes
- No
- I don't wish to answer

Vaginal bleeding during or after sexual intercourse

- Not relevant, as I am not sexually active
- Yes
- No
- I don't wish to answer

Pelvic pain during intercourse

- Not relevant, as I am not sexually active
- Yes
- No
- I don't wish to answer



1  
2  
3  
4  
5  
6  
7  
8  
9  
10  
11  
12  
13  
14  
15  
16  
17  
18  
19  
20  
21  
22  
23  
24  
25  
26  
27  
28  
29  
30  
31  
32  
33  
34  
35  
36  
37  
38  
39  
40  
41  
42  
43  
44  
45  
46  
47  
48  
49  
50  
51  
52  
53  
54  
55  
56  
57  
58  
59  
60

The next question may seem private, but your response may contribute to a greater understanding of the prevalence of symptoms or discomfort in the population. If you do not wish to answer the question, simply tick the category "Do not wish to answer."

*Only for men:*

Have you within **the last 4 weeks** experienced any of the following?

- Erectile dysfunction
- Blood in the semen
- None of the above
- I don't wish to answer

*Only for women, and only if stated that they had not yet reached the menopause:*

Are you currently pregnant, or have you been pregnant within **the last 6 months**?

- Yes
- No
- I don't know/ I don't wish to answer

*Only for women*

How many sexual relationships have you had altogether from your sexual debut and until now?

- Have not yet had my sexual debut
- 1-5
- 6-10
- 11-15
- 16-20
- 21-25
- More than 26
- I don't wish to answer

How many sexual relationships have you had within the last year?

- 0
- 1-5
- 6-10
- 11-15
- 16-20
- 21-25
- More end 26
- I don't wish to answer

*The following questions only appeared in relation to a positive expression of one or more experienced symptom(s) - by a leap structure in the electronic survey to the symptom experience*

We will now ask you some elaborating questions, which deal with the sensations, symptoms or discomfort that you have just stated.

When did you experience these for the first time:

|                          | Less than a month ago    | 1-3 months ago           | 3-6 months ago           | More than 6 months ago   |
|--------------------------|--------------------------|--------------------------|--------------------------|--------------------------|
| Abdominal pain<br>Etc... | <input type="checkbox"/> | <input type="checkbox"/> | <input type="checkbox"/> | <input type="checkbox"/> |

Within **the last 4 weeks**: To what extent did you experience that the following symptoms or discomfort interfered with your usual daily activities?

|                          | Not at all               | Slightly                 | Moderate                 | Quite a bit              | Extremely                |
|--------------------------|--------------------------|--------------------------|--------------------------|--------------------------|--------------------------|
| Abdominal Pain<br>Etc... | <input type="checkbox"/> |

Within the last 4 weeks: To what extent were you concerned about the following symptoms or discomfort?

|                          | Not at all               | Slightly                 | Moderate                 | Quite a bit              | Extremely                |
|--------------------------|--------------------------|--------------------------|--------------------------|--------------------------|--------------------------|
| Abdominal Pain<br>Etc... | <input type="checkbox"/> |

The following questions only appeared in relation to a positive expression of one or more experienced symptom(s) - by a leap structure in the electronic survey to the symptom experience

We will now ask you some questions concerning who you have talked to about the symptoms or discomfort you experienced **in the last 4 weeks**.

Have you contacted your general practitioner with any of the following symptoms or discomfort? (Through appointment, by telephone or by email)

- Yes  
 No

The following questions only appeared in relation to a positive expression of one or more experienced symptom(s) - by a leap structure in the electronic survey to the symptom experience

You have been in contact with your general practitioner regarding the following symptoms and discomforts. We would now like to know, whether you had some of the following considerations, **before** contacting your general practitioner? (You may tick more than one box)

|                        |                                                       | Yes                      | No                       |
|------------------------|-------------------------------------------------------|--------------------------|--------------------------|
| Abdominal pain<br>Etc. | I would be too embarrassed                            | <input type="checkbox"/> | <input type="checkbox"/> |
|                        | I would be worried about wasting the doctor's time    | <input type="checkbox"/> | <input type="checkbox"/> |
|                        | I would be worried about what the doctor might find   | <input type="checkbox"/> | <input type="checkbox"/> |
|                        | I would be too busy to make time to go to the doctor  | <input type="checkbox"/> | <input type="checkbox"/> |
|                        | Other considerations [box for free text commentaries] |                          |                          |

The following questions only appeared in relation to a positive expression of one or more experienced symptom(s) - by a leap structure in the electronic survey to the symptom experience

You have **not** been in contact with your general practitioner regarding the following symptoms and discomforts. We would now like to know, whether you had some of the following considerations, regarding contact to your general practitioner? (You may tick more than one box)

|                        |                                                       | Yes                      | No                       |
|------------------------|-------------------------------------------------------|--------------------------|--------------------------|
| Abdominal pain<br>Etc. | I would be too embarrassed                            | <input type="checkbox"/> | <input type="checkbox"/> |
|                        | I would be worried about wasting the doctor's time    | <input type="checkbox"/> | <input type="checkbox"/> |
|                        | I would be worried about what the doctor might find   | <input type="checkbox"/> | <input type="checkbox"/> |
|                        | I would be too busy to make time to go to the doctor  | <input type="checkbox"/> | <input type="checkbox"/> |
|                        | Other considerations [box for free text commentaries] |                          |                          |

1  
2  
3  
4  
5  
6 Which of the following other health care professionals or therapists have you talked to/consulted  
7 regarding the symptoms or discomforts listed below (through appointment, by telephone or by  
8 email)? (you may tick more than one box)  
9

- 10  
11  
12  
13 Abdominal pain  
14 Etc.  
15  
16  
17  
18  
19
- None
  - Another doctor (practicing specialist, out-of-hours physician or hospital physician)
  - Physiotherapist/chiropractor
  - Home help/district nurse
  - Pharmacy staff
  - Alternative therapist (e.g. homeopath, healer, reflexologist)
  - Other

20  
21 Which of the following members of your family or social network have you talked to about the  
22 symptoms or discomforts listed below? (you may tick more than one box)  
23

- 24  
25  
26 Abdominal pain  
27 Etc.  
28  
29  
30  
31  
32  
33  
34  
35  
36  
37  
38  
39  
40  
41  
42  
43  
44  
45  
46  
47  
48  
49  
50  
51  
52  
53  
54  
55  
56  
57  
58  
59  
60
- None
  - Spouse/partner
  - Children
  - Parents
  - Colleague /classmate
  - Friend
  - Neighbour
  - Other

We will proceed to another category of questions regarding abdominal pain. Furthermore we ask questions regarding various factors that may have impact on abdominal pain and discomfort. Because we use several different questionnaires you might experience that some of the questions appear similar. There are however nuances in the items that are important for the survey.

In **the last 3 months**, how often did you have acid regurgitation or heartburn (a burning epigastric discomfort or burning pain in your chest)?

- Never
- Less than one day a month
- One day a month
- Two to three days a month
- One day a week
- More than one day a week
- Everyday

*The next three questions are skipped if the answer is "never" in the above-mentioned questions.*

When you experience acid regurgitation or heartburn (a burning epigastric discomfort or burning pain in your chest), how severe are your discomforts?

- Very mild
- Mild
- Moderately
- Severe
- Very severe

To what extent does your acid regurgitation or heartburn (a burning epigastric discomfort or burning pain in your chest) affect your sleep?

- My sleep is not affected
- My sleep is affected to some extent
- My sleep is affected to a great extent

To what extent does your acid regurgitation or heartburn (a burning epigastric discomfort or burning pain in your chest) affect your everyday activities?

- Not at all
- Slightly
- Moderately
- Quite a bit
- Extremely

The following questions concern abdominal pain and bowel habits.

*The next questions are related to the Rome 3 criteria for IBS: IF the symptoms are experienced less than two to three days a month, the rest of the questions for IBS are skipped*

In the last 3 months, how often did you have discomfort or pain anywhere in your abdomen?

- Never
- Less than one day a month
- One day a month
- Two to three days a month
- One day a week
- More than one day a week
- Every day

For women: Did this discomfort or pain occur only during your menstrual bleeding and not at other times?

- No
- Yes
- Does not apply because I have had the change in life (menopause) or I am a male

Have you had this discomfort or pain 6 months or longer?

- No
- Yes

How often did this discomfort or pain get better or stop after you had a bowel movement?

- Never or rarely
- Sometimes
- Often
- Most of the time
- Always

When this discomfort or pain started, did you have more frequent bowel movements?

- Never or rarely
- Sometimes
- Often
- Most of the time
- Always

When this discomfort or pain started, did you have less frequent bowel movements?

- Never or rarely
- Sometimes
- Often
- Most of the time
- Always

When this discomfort or pain

- Never or rarely

1  
2  
3  
4  
5  
6  
7  
8  
9  
10  
11  
12  
13  
14  
15  
16  
17  
18  
19  
20  
21  
22  
23  
24  
25  
26  
27  
28  
29  
30  
31  
32  
33  
34  
35  
36  
37  
38  
39  
40  
41  
42  
43  
44  
45  
46  
47  
48  
49  
50  
51  
52  
53  
54  
55  
56  
57  
58  
59  
60

started, were your stools (bowel movements) looser?

- Sometimes
- Often
- Most of the time
- Always

When this discomfort or pain started, how often did you have harder stools?

- Never or rarely
- Sometimes
- Often
- Most of the time
- Always

In the **last 3 months**, how often did you have hard or lumpy stools?

- Never or rarely
- About 25% of the time
- About 50% of the time
- About 75% of the time
- Always, 100% of the time

In the **last 3 months**, how often did you have loose, mushy or watery stools?

- Never or rarely
- About 25% of the time
- About 50% of the time
- About 75% of the time
- Always, 100% of the time

The following questions concern feeling of fullness after meals and pain or burning sensation in the stomach.

*The next questions are related to the Rome 3 criteria for functional dyspepsia*

- In the **last 3 months**, how often did you feel uncomfortably full after a regular- sized meal?
- Never
  - Less than one day a month
  - One day a month
  - Two to three days a month
  - One day a week
  - More than one day a week
  - Every day

*The next questions only appeared if symptoms are experienced for one day a week or more*

- Have you had this uncomfortable fullness after meals **6 months or longer**?
- No
  - Yes

- In the **last 3 months**, how often were you unable to finish a regular size meal?
- Never
  - Less than one day a month
  - One day a month
  - Two to three days a month
  - One day a week
  - More than one day a week
  - Every day

- Have you had this inability to finish regular size meals **6 months or longer**?
- No
  - Yes

- In the **last 3 months**, how often did you have pain or burning in the middle of your abdomen, above your belly button but not in your chest?
- Never
  - Less than one day a month
  - One day a month
  - Two to three days a month
  - One day a week
  - More than one day a week
  - Every day

- Have you had this pain or burning **6 months or longer**?
- No
  - Yes



We now proceed to the next category of questions that concern symptoms or discomforts from many parts of the body and how this affects your everyday life.

Have you within **the last 4 weeks** experienced any of the following symptoms or discomforts? (You may tick more than one box)

- Palpitations/heart pounding?
- Precordial discomfort?
- Breathlessness without exertion?
- Hot or cold sweats?
- Dry mouth?
- None of the above

To what extent did you experience that the following symptoms or discomfort interfered with your usual daily activities?

- Not relevant, as I did not experience any of the above symptoms or discomforts
- Not at all
- Slightly
- Moderately
- Quite a bit
- Extremely

Have you within the **last 4 weeks** experienced any of the following symptoms or discomforts? (You may tick more than one box)

- Pains in arms or legs?
- Muscular aches or pains?
- Pains in the joints?
- Feeling of paresis or localized weakness?
- Pain moving from one place to another?
- Unpleasant numbness or tingling sensations?
- None of the above

To what extent did you experience that the following symptoms or discomfort interfered with your usual daily activities?

- Not relevant, as I did not experience any of the above symptoms or discomforts
- Not at all
- Slightly
- Moderately
- Quite a bit
- Extremely

The following questions concern trembling of the hands and trembling of other parts of the body. Your answers may contribute to a larger understanding of what part trembling plays for the quality of life and for health in general.

Do you have problems with your hands trembling when you have to drink a cup or a glass or pour it?

- Yes
- No

Do you often experience that your hands, arms or the voice tremble and quiver without you being able to control it?

- Yes
- No

Has a doctor diagnosed you with:

- Familial tremor or essential tremor
- Parkinson's disease
- None of the above

Does anyone in your family have or have had the same type of trembling as you?

- Yes
- No
- I don't know

How many of your relatives suffer from a similar trembling?

- None
- 1
- 2
- 3
- More than 3
- I don't know

Consumption of alcohol can alter certain types of trembling. When you drink alcohol, do you then experience that you trembling:

- Decreases
- Worsens
- Remains unchanged
- I don't know, because I don't drink alcohol

1  
2  
3  
4  
5 How old were you when your trembling began?  
6  
7 \_\_\_\_\_ years  
8

9 Within **the last week**: If you sit at the table, do you have problems with drinking liquid from a glass?  
10

- 11  I haven't had problems drinking from the glass  
12  I can drink from the glass with one hand, but if I must avoid spilling, there may not be much  
13 liquid in the glass.  
14  I cannot drink from the glass with only one hand, but must use both hands.  
15  I cannot drink from the glass even if I use both hands, but must use a straw.  
16  
17

18 Has a doctor diagnosed one of the following causes for your trembling?  
19

- 20  I have not been diagnosed  
21  Stroke  
22  Dystonia  
23  Medication  
24  Other  
25  
26  
27  
28  
29  
30  
31  
32  
33  
34  
35  
36  
37  
38  
39  
40  
41  
42  
43  
44  
45  
46  
47  
48  
49  
50  
51  
52  
53  
54  
55  
56  
57  
58  
59  
60

We have now finished asking about specific symptoms and discomforts. The next questions are of a general nature and concern your own perception of your health, your lifestyle, your management of problems and your worry about disease.

In general, would you say your health is:

- Excellent
- Very good
- Good
- Fair
- Poor

Do you feel well enough to do what you feel like doing?

- Yes, mostly
- Yes, sometimes
- No, almost never
- I don't know

The following questions are about physical activity, smoking and alcohol habits.

How do you rate your physical fitness?

- Very good
- Good
- Fair
- Not so good
- Poor

Do you smoke?

- Yes, every day
- Yes, at least once a week
- Yes, less than once a week
- No, I have stopped
- No, I have never smoked

1  
2  
3  
4  
5 How often do you drink anything containing alcohol?  
6  
7

- 8  Never  
9  Once a month at the most  
10  2-4 times a month  
11  2-3 times a week  
12  4 times a week or more  
13

14  
15 *The following questions only appeared in relation to a positive expression of smoking and/or*  
16 *alcohol intake - by a leap structure in the electronic survey*  
17

18 How many units do you drink per week on average? (One unit corresponds to a normal beer (33 cl),  
19 a glass of wine (12 cl) or spirits (4 cl))  
20

- 21  1-7 units/week  
22  8-14 units/week  
23  15-21 units/week  
24  22-28 units/week  
25  More than 29 units/week  
26  
27

28  
29 For how many years have you smoked?  
30

31 I have smoked for approximately  
32

33 \_\_\_\_\_ years (State the number of years in whole numbers)  
34  
35

36  
37 How much do/did you smoke on average a day?  
38

39 On average I smoke approximately  
40

41 \_\_\_\_\_ cigarettes (state the approximate number of cigarettes in whole numbers)  
42

43 \_\_\_\_\_ cheroots (state the approximate number of cheroots in whole numbers)  
44

45 \_\_\_\_\_ cigars (state the approximate number of cigars in whole numbers)  
46

47 \_\_\_\_\_ pipes (state the approximate number of pipes in whole numbers)  
48  
49  
50  
51  
52  
53  
54  
55  
56  
57  
58  
59  
60

The following questions are about your height and weight.

How tall are you (without shoes)?

State your height in whole numbers measured in cm (e.g. 172)

\_\_\_\_\_cm

How much do you weigh (without clothes)?

State your weight in full kg (e.g. 67)

\_\_\_\_\_kg

The next questions are about your own concerns about your current health and whether other people have expressed concern about your current health.

To what extent are you **concerned** about your current health?

- Not at all
- Slightly
- Moderately
- Quite a bit
- Extremely

Has a doctor expressed concern about your current health?

- Yes
- No
- I don't know

Have people in your family or social network expressed concern about your current health?

- Yes
- No
- I don't know

The following questions are about your experiences with your own disease or in your social network.

Do you have any chronic disease, long-term effects after injuries, disability or other chronic disorder?

- Yes
- No
- I don't know

Have people in your immediate family (siblings, children, spouse, parents) had a serious illness?

- Yes
- No
- I don't know

Have people in your social network (friends, neighbours etc.) had a serious illness?

The following questions are about your contact with other people

How often are you in contact with friends, acquaintances or family that you do not live with? By contact is meant that you are together, talking with each other on the phone, writing to each other etc.

- Daily or almost daily
- 1-2 times a week
- 1 or more times a month
- Less than once a month
- Never
- I don't know

If you become ill and need help with practical things, can you count on help from others? (By others is meant people you do not live with)

- Yes, definitely
- Yes, maybe
- No

1  
2  
3  
4 Does it ever happen that you are alone, even if you want to be in the company of others?  
5

- 6  Yes, often  
7  Yes, once in a while  
8  Yes, but rarely  
9  No, never or almost never  
10  
11

12 Do you have someone to talk to if you have problems or need support?  
13

- 14  Yes, often  
15  Yes, mostly  
16  Yes, sometimes  
17  No, never or almost never  
18  
19  
20  
21  
22  
23  
24  
25  
26  
27  
28  
29  
30  
31  
32  
33  
34  
35  
36  
37  
38  
39  
40  
41  
42  
43  
44  
45  
46  
47  
48  
49  
50  
51  
52  
53  
54  
55  
56  
57  
58  
59  
60



The questions on this page deal with how you usually act in relation to problems and disease. For each item, place a tick in the box that best fits what you think about yourself just now. The questions are written in 'I' form, and you place your tick depending on how much you agree/disagree.

|                                                                              | Agree completely         | Tend to agree            | Yes and no               | Tend to disagree         | Disagree completely      |
|------------------------------------------------------------------------------|--------------------------|--------------------------|--------------------------|--------------------------|--------------------------|
| I say so if I am angry or sad.                                               | <input type="checkbox"/> |
| I like to talk with few chosen people when things get too much for me.       | <input type="checkbox"/> |
| I make an active effort to find a solution to my problems.                   | <input type="checkbox"/> |
| Physical exercise is important to me.                                        | <input type="checkbox"/> |
| I think something positive could come out of my complaints/problems.         | <input type="checkbox"/> |
| I firmly believe that my problems will decrease (and my situation improves). | <input type="checkbox"/> |
| I try to forget my problems.                                                 | <input type="checkbox"/> |
| I put my problems behind me by concentrating on something else.              | <input type="checkbox"/> |
| I bury myself in work to keep my problems at a distance.                     | <input type="checkbox"/> |
| I often find it difficult to do something new.                               | <input type="checkbox"/> |
| I am well on the way towards feeling I have given up.                        | <input type="checkbox"/> |
| I withdraw from other people when things get difficult.                      | <input type="checkbox"/> |

The last group of questions concern your attitude to risk and your satisfaction with your life in general

Imagine that you unexpectedly inherited DKK 10,000 (approximately USD 2,000) from a distant relative. Subsequently you have the possibility of participating in a lottery with an equal chance of doubling the money or losing the money. That means that there is a 50% chance of you winning DKK 20,000 and a 50% chance of losing the DKK 10,000.

What do you choose?

- I choose to participate in the lottery
- I choose not to participate in the lottery
- I don't know

How do you normally react in relation to health and disease. Please tick one box for each statements to show how much you agree/disagree.

|                                                                                                                | Completely agree         | Tend to agree            | Yes and no               | Tend to disagree         | Completely disagree      |
|----------------------------------------------------------------------------------------------------------------|--------------------------|--------------------------|--------------------------|--------------------------|--------------------------|
| I focus a lot on having a healthy behaviour and prefer to avoid risks that can affect my health.               | <input type="checkbox"/> |
| If I experience symptoms, I generally count on it passing.                                                     | <input type="checkbox"/> |
| I do not like to take chances regarding my health and prefer to see my GP once too often than once too little. | <input type="checkbox"/> |

In the following we will inform you how old people at your age on average can expect to become. If you do not want the information, please tick the box.

How old are you?

\_\_\_\_ Year

I don't want the information

Men, your age can expect to live, on average, until they are

\_\_\_\_ Year

Women, your age can expect to live, on average, until they are

\_\_\_\_ Year

Do you think that you will live longer or shorter than the average person?

- Longer than the average person
- Like the average person
- Shorter than the average person
- I don't know

On a scale from 0 till 10, where 0 means that you are very dissatisfied and 10 means that you are completely satisfied, how satisfied are you with your life in general.

Dissatisfied      0    1    2    3    4    5    6    7    8    9    10      Completely satisfied

                               

Should you have any comments to the questionnaire, please feel free to list them here:

You have now finished the questionnaire.

Thank you very much for your reply.

If any of the questions have made you concerned about your health, we recommend that you contact your general practitioner.

Press exit to close the window

1  
2  
3  
4 **Supplementary File 2**

5  
6 **List of the 36 symptoms from The Danish Symptom Cohort included in this study.**

7  
8  
9

| Symptoms                        |                                    |
|---------------------------------|------------------------------------|
| Tiredness                       | Swollen legs                       |
| Night-time urination            | Difficulty in emptying the bladder |
| Lack of energy                  | Frequent urination                 |
| Headache                        | Stress incontinence                |
| Back pain                       | Shortness of breath                |
| Abdominal bloating              | Hoarseness                         |
| Memory problems                 | Urge incontinence                  |
| Abdominal pain                  | Loss of appetite                   |
| Coughing                        | Blood in stool/rectal bleeding     |
| Concentration problems          | Fever                              |
| Change in stool texture         | Difficulty swallowing              |
| Dizziness                       | Weight loss                        |
| Feeling unwell                  | Incontinence without stress/urge   |
| Constipation                    | Pain/burning when urinating        |
| Increase in waist circumference | Lump/swollen lymph node            |
| Change in stool frequency       | Black stool                        |
| Diarrhoea                       | Repeated vomiting                  |
| Nausea                          | Blood in urine                     |

10  
11  
12  
13  
14  
15  
16  
17  
18  
19  
20  
21  
22  
23  
24  
25  
26  
27  
28  
29  
30  
31  
32  
33  
34  
35  
36  
37  
38  
39  
40  
41  
42  
43  
44  
45  
46  
47  
48  
49  
50  
51  
52  
53  
54  
55  
56  
57  
58  
59  
60

### Supplementary File 3

*Symptom burden in multimorbidity. A Danish population study.*

#### Definition of Multimorbidity

In this article multimorbidity was defined in to steps

- 1) Selection of diagnoses
- 2) Grouping of diagnoses according to different systems of the body

#### Selection of diagnoses

By this definition of multimorbidity we aim to have a simple and clinically relevant definition that at the same time is able to embrace complexity. Therefore, the definition is organized according to clinical picture rather than disease etiology. Diagnoses are considered on the basis of the following criteria:

- Diagnoses with high prevalence in the Danish population. (Risk factors are not included because of the low completeness of this information in the registers)
- Diagnoses relevant for general practice
- Diagnoses causing severe loss of function and/or loss of quality of life
- Diagnoses combined with reduced life expectancy
- Diagnoses resulting in a considerable treatment burden for the patient
- Chronic conditions (e.g. conditions that "require ongoing management over a period of years or decades"(1)).

Congenital diseases are not included.

#### Grouping of diagnoses according to different systems of the body

To have multimorbidity, a patient has to have a least one diagnosis from each of two different groups of diagnoses. E.g., if a patient has asthma and COPD this patient is categorized as lung sick instead of multimorbid. This choice rests on the assumption that it is more complex from an organizational and physiological point of view if the patient suffers from diagnoses from different bodily systems. Furthermore, concordant conditions (conditions with overlapping pathophysiology and management) are intended to be gathered in the same group (2). However, diabetes and cardiovascular diseases which could be expected to share both pathophysiology and risk factors are distributed over two different groups because they after all have different clinical manifestations and different treatments. The grouping of diagnoses and count of bodily system morbidity instead of single diagnoses may better relate to the way health care is organized as well as to the complexity and burden of morbidity (3).

See table A below for the selected diagnoses and bodily systems.

#### Background for redefining multimorbidity

In the literature the variation in how to define multimorbidity is large and the lack of consensus is evident (4-6). Most studies on multimorbidity include diagnoses based on the argument that the

1  
2  
3  
4 diagnoses are common (6). However, if only selecting diagnoses based on prevalence there would  
5 be a risk of excluding many relevant conditions. In some studies authors selected a limited number  
6 of diagnoses thoroughly (7), others included all chronic ICPC codes (8), or selected specific chronic  
7 diagnoses from ICPC (9, 10). Others selected all existing ICD-10 codes without further explanation  
8 (11) or let the diagnoses count for the chapter in the ICD-10 system they came from (12). Some  
9 authors used indices, mainly developed for comorbidity, e.g. Charlson Comorbidity Index (CCI)  
10 (13, 14) and Cumulative Illness Rating Scale (CIRS) (15-17).  
11  
12

13 We could have included all possible codes from the ICD-10 system. However, doing so would have  
14 resulted in some rather small groups of multimorbidity combinations and diagnoses of less  
15 importance in relation to prevalence and mortality. To use chapters from ICD-10 could be an  
16 option, but some chapters are difficult to apply to the above stated selection criteria. Furthermore,  
17 an already existing index could be used. However, CCI was primarily developed for studying one-  
18 year mortality and we prefer a broader pallet of diagnoses than they suggest. On the other hand,  
19 CIRS could be interesting because it takes severity in to account, nevertheless, this would require  
20 access to medical records that were not available in the present register study.  
21  
22

23  
24 Tonelli et al. (18) suggested a panel of 30 conditions when doing research on multimorbidity and  
25 their recommendation was based on 40 conditions included in a Scottish study (7). Of notice, most  
26 diagnoses used in these two studies were also included in our study, with a few exceptions:  
27 connective tissue disorders, chronic pain, hypertension, severe constipation, transient ischemic  
28 attacks, diverticular disease of intestine, peripheral vascular disease, prostate disorders, chronic  
29 sinusitis, learning disability, bronchiectasis and viral hepatitis. The reason for not including these  
30 conditions is that some of them are acute rather than chronic, some of them are closely related to  
31 other conditions covered by our diagnosis groups, and the validity of the coding in the national  
32 registers is relatively low for some of the diagnoses mentioned above. In particular risk factors, like  
33 hypertension, are underreported, leading to low completeness and a larger underestimation of these  
34 conditions compared with others.  
35  
36

37 By this definition complexity can be grasped, and prevalent diseases with significant impact on  
38 patients' lives can be included, but without the need of including all possible ICD-10 codes.  
39  
40

#### 41 Registers

42  
43 The data was extracted from the following registers:  
44

45 The Danish National Patient Registry (NPR) (19)

46 The Danish Psychiatric Central Research Register (PCRR) (20)

47 The Danish Cancer Register (CR) (21)  
48  
49

50 The registers contain information solely from the Danish hospital sector. Since we are interested in  
51 general medicine it would be optimal to use ICPC codes from primary care. However, there is no  
52 access to ICPC codes and there exist no registers validated for research with primary care data in  
53 Denmark yet.  
54  
55

56 All codes are based on International Classification of Diseases, 10<sup>th</sup> edition (ICD-10) and the earlier  
57 8<sup>th</sup> edition (ICD-8). ICD is a well-established coding system used in 117 countries and translated  
58 into 40 languages. The coding system is based on the medical specialties and hence coded in 21  
59  
60

chapters. The coding system is reliable because of the long history, the many editions with continuous improvements and the involvement of medical experts (22). ICD-10 was introduced in Denmark 1 January 1994 and the present study contains both ICD-8 and ICD-10 diagnoses. NPR contains information on all inpatient care contacts in secondary care since 1977 and from 1995 also outpatient and emergency care contacts. Psychiatric diagnoses were included in NPR from 1995 (19). ICD-8 and ICD-10 are not comparable in every detail, and this has required a pragmatic approach when selecting diagnoses. In certain cases, one cannot distinguish between acute and chronic diagnoses in ICD-8, which sometimes leads to inclusion of the corresponding broader ICD-10 diagnoses with less relevant subcategories.

The validity and completeness of the registers vary. NPR constantly control data received from hospitals for incorrect codes and inconsistencies between sex and diagnoses in order to increase validity and completeness. Validation studies have shown variation in positive predictive value (PPV) between specialties and PPV showed to be higher when including three-number digits in ICD compared to five-number digits (23). In our definition of multimorbidity the three digit level is used as the highest level. Moreover, by using groups of conditions the need of high validity of some of the variables is reduced, e.g. whether atrial fibrillation is correctly coded as fibrillation or incorrectly as atrial flutter is of minor importance, since both conditions are included in the same diagnosis group: heart disease.

In our study we included diagnoses from a window ten years back in time from year 2000. Due to this choice some prevalent cases will be mistaken for being incident. The change from ICD-8 to ICD-10 in 1994 will probably lead to a higher number of incident cases around that year (23). Since 1994 is placed in the middle of our collection period a larger number of truly prevalent cases will probably be collected before 1994 and a larger number of cases falsely considered being incident in the year after. However, we do not necessarily consider prevalent cases less important than incident. Changes in diagnostic criteria and methods over time may also have affected how to interpret incidence (19).

For CR the validity is secured through daily control routines and yearly publications where checks for internal consistency are performed. Furthermore, the register uses several sources e.g. pathology to check their own information leading to high completeness of the register (21).

Validation studies on certain diagnoses have turned out well for PCRR (24, 25), but a systematic validation of the whole register has never been performed. There exist no private hospitals in Denmark for treating psychiatric patients therefore PCRR has high completeness. It has to be kept in mind, however, that the relatively large number of people treated for psychiatric diagnoses in primary care and at private practicing psychiatrists is not included in the register (20).

### Diagnoses and organ systems included in the multimorbidity definition

|                                             | ICD-10  | ICD-8 |
|---------------------------------------------|---------|-------|
| Lung diagnoses (LUNG)                       |         |       |
| COPD                                        | J44     | 490   |
| Chronic bronchitis                          | J41-J42 | 491   |
| Emphysema                                   | J43     | 492   |
| Asthma                                      | J45-J46 | 493   |
| Musculoskeletal diagnoses (MUSCULOSKELETAL) |         |       |

|                                                                                                                                                                                                                                |                                           |                                               |
|--------------------------------------------------------------------------------------------------------------------------------------------------------------------------------------------------------------------------------|-------------------------------------------|-----------------------------------------------|
| Rheumatic diagnoses / arthritis                                                                                                                                                                                                | L40.5, M05-M07                            | 696.09, 712, 715                              |
| Arthrosis                                                                                                                                                                                                                      | M15-M17                                   | 713.00-09                                     |
| Back diagnoses                                                                                                                                                                                                                 | M45, M47, M50-M51, M53-M54                | 712.49, 725, 728                              |
| Osteoporosis                                                                                                                                                                                                                   | M80-M82                                   | 723.09                                        |
| Endocrine diagnoses (ENDO)                                                                                                                                                                                                     |                                           |                                               |
| Hypothyroidisme                                                                                                                                                                                                                | E03                                       | 244                                           |
| Hyperthyroidisme                                                                                                                                                                                                               | E05                                       | 242                                           |
| Diabetes                                                                                                                                                                                                                       | E10-E14                                   | 249-250                                       |
| Mental health diagnoses (MENTAL HEALTH)                                                                                                                                                                                        |                                           |                                               |
| Inclusion of all patients registered with a psychiatric diagnose in Psychiatric Central Register (except for patients having only Y - or Z-diagnoses) (26) and the following dementia and alcohol-related diagnoses from DNPR: |                                           |                                               |
| Dementia                                                                                                                                                                                                                       | G30, G31.8-9, F00, F01, F02.0, F02.3, F03 | 290, 293                                      |
| Alcohol                                                                                                                                                                                                                        | F10.1-F10.9                               | 291, 303                                      |
| Cancer (CANCER)                                                                                                                                                                                                                |                                           |                                               |
| All diagnoses from CR except C44, non-melanoma skin cancer.                                                                                                                                                                    |                                           |                                               |
| Neurological diagnoses (NEURO)                                                                                                                                                                                                 |                                           |                                               |
| Apoplexia cerebri (stroke)                                                                                                                                                                                                     | I60-I64, I69                              | 430-431, 433-434, 436-437                     |
| Multiple sclerosis                                                                                                                                                                                                             | G35                                       | 340                                           |
| Epilepsy                                                                                                                                                                                                                       | G40                                       | 345                                           |
| Migraine                                                                                                                                                                                                                       | G43                                       | 346                                           |
| Parkinson disease                                                                                                                                                                                                              | G20                                       | 342                                           |
| Gastrointestinal diagnoses (GASTRO)                                                                                                                                                                                            |                                           |                                               |
| Dyspepsia                                                                                                                                                                                                                      | K30                                       | 536.90-91                                     |
| Mb. Crohn and colitis ulcerosa                                                                                                                                                                                                 | K50-K51                                   | 563                                           |
| Colon irritabile                                                                                                                                                                                                               | K58                                       | 564.19                                        |
| Chronic liver disease                                                                                                                                                                                                          | K70-K76                                   | 571-573                                       |
| Chronic pancreatitis                                                                                                                                                                                                           | K86.0, K86.1                              | 577.10,577.11,577.19                          |
| Cardiovascular diagnoses (HEART)                                                                                                                                                                                               |                                           |                                               |
| Ischemic heart disease                                                                                                                                                                                                         | I20-I25                                   | 410-413                                       |
| Heart failure and arrhythmia                                                                                                                                                                                                   | I44.1-7, I45.2-9, I47-I50                 | 427.09, 427.19, 427.23-24, 427.90-97, 428     |
| Heart valve diagnoses                                                                                                                                                                                                          | I05-I08, I34-I37                          | 394-396, 397.00, 397.01, 424.00-19, 424.90-92 |
| Genitourinary diagnoses (KIDNEY)                                                                                                                                                                                               |                                           |                                               |
| Chronic kidney disease                                                                                                                                                                                                         | N03-N05, N11-N12, N18-N19, Z49, Z99.2     | 581, 582, 583, 590.09, 590.15, 792            |
| Urinary incontinence                                                                                                                                                                                                           | N39.3-4                                   | 786.29                                        |
| Endometriosis                                                                                                                                                                                                                  | N80                                       | 625.30-39                                     |



| Diagnoses in sensory organs (SENSORY) |                                               |                     |
|---------------------------------------|-----------------------------------------------|---------------------|
| Glaucoma                              | H40                                           | 375                 |
| Blindness and low vision              | H54.0-54.3, H54.7                             | 379.09, 379.19      |
| Loss of hearing                       | H90.0, H90.2, H90.3, H90.5, H90.6, H90.8, H91 | 388, 389.09, 389.99 |
| Psoriasis                             | L40                                           | 696.10, 696.19      |

**Table A.** In order to have multimorbidity the patient needs at least one diagnosis from two different bodily systems; for instance COPD from LUNG and multiple sclerosis from NEURO.

## References

1. WHO. Innovative care for chronic conditions: building blocks for action: global report. Available at: [http://www.who.int/chp/knowledge/publications/iccc\\_ch1.pdf](http://www.who.int/chp/knowledge/publications/iccc_ch1.pdf); Geneva, Switzerland; 2002.
2. Piette JD, Kerr EA. The impact of comorbid chronic conditions on diabetes care. *Diabetes care.* 2006;29(3):725-31.
3. Doessing A BV. Care coordination of multimorbidity: a scoping study. *J of Comorbidity.* 2015;5:15-28.
4. Willadsen TG, Bebe A, Koster-Rasmussen R, et al. The role of diseases, risk factors and symptoms in the definition of multimorbidity - a systematic review. *Scand J Prim Health Care.* 2016;34(2):112-21.
5. Huntley AL, Johnson R, Purdy S, et al. Measures of multimorbidity and morbidity burden for use in primary care and community settings: a systematic review and guide. *AnnFamMed.* 2012;10(2):134-41.
6. Diederichs C, Berger K, Bartels DB. The measurement of multiple chronic diseases--a systematic review on existing multimorbidity indices. *J GerontolA BiolSciMedSci.* 2011;66(3):301-11.
7. Barnett K, Mercer SW, Norbury M, et al. Epidemiology of multimorbidity and implications for health care, research, and medical education: a cross-sectional study. *Lancet.* 2012;380(9836):37-43.
8. van den Akker M, Buntinx F, Metsemakers JF, et al. Multimorbidity in general practice: prevalence, incidence, and determinants of co-occurring chronic and recurrent diseases. *Journal of clinical epidemiology.* 1998;51(5):367-75.
9. O'Halloran J, Miller GC, Britt H. Defining chronic conditions for primary care with ICPC-2. *Family practice.* 2004;21(4):381-6.

10. Rizza A, Kaplan V, Senn O, et al. Age- and gender-related prevalence of multimorbidity in primary care: the Swiss FIRE project. *BMC FamPract*. 2012;24(13):113.
11. Mazya AL, Eckerblad J, Jaarsma T, et al. The Ambulatory Geriatric Assessment - A Frailty Intervention Trial (AGE-FIT) - A randomised controlled trial aimed to prevent hospital readmissions and functional deterioration in high risk older adults: A study protocol. *European Geriatric Medicine*. 2013;4(4).
12. Schneider F, Kaplan V, Rodak R, et al. Prevalence of multimorbidity in medical inpatients. *Swiss MedWkly*. 2012;142:w13533.
13. Charlson ME, Pompei P, Ales KL, et al. A new method of classifying prognostic comorbidity in longitudinal studies: development and validation. *Journal of chronic diseases*. 1987;40(5):373-83.
14. Van Eijk MS, Van Der Linde H, Buijck B, et al. Predicting prosthetic use in elderly patients after major lower limb amputation. *ProsthetOrthotInt*. 2012;36(1):45-52.
15. Hudon C, Fortin M, Vanasse A. Cumulative Illness Rating Scale was a reliable and valid index in a family practice context. *J ClinEpidemiol*. 2005;58(6):603-8.
16. Linn BS, Linn MW, Gurel L. Cumulative illness rating scale. *Journal of the American Geriatrics Society*. 1968;16(5):622-6.
17. Fortin M, Dubois MF, Hudon C, et al. Multimorbidity and quality of life: a closer look. *Health and quality of life outcomes*. 2007;5:52.
18. Tonelli M, Wiebe N, Fortin M, et al. Methods for identifying 30 chronic conditions: application to administrative data. *BMC medical informatics and decision making*. 2015;15:31.
19. Lynge E, Sandegaard JL, Rebolj M. The Danish National Patient Register. *Scandinavian journal of public health*. 2011;39(7 Suppl):30-3.
20. Mors O, Perto GP, Mortensen PB. The Danish Psychiatric Central Research Register. *Scandinavian journal of public health*. 2011;39(7 Suppl):54-7.
21. Gjerstorff ML. The Danish Cancer Registry. *Scandinavian journal of public health*. 2011;39(7 Suppl):42-5.
22. ICD-10, International Statistical Classification of Diseases and Related Health Problems 10th Revision, Intruction Maunal. World Health Orginazation, 2010. Available from: [http://www.who.int/classifications/icd/ICD10Volume2\\_en\\_2010.pdf](http://www.who.int/classifications/icd/ICD10Volume2_en_2010.pdf) [Last accessed: Dec 11, 2017].

1  
2  
3  
4  
5  
6  
7  
8  
9  
10  
11  
12  
13  
14  
15  
16  
17  
18  
19  
20  
21  
22  
23  
24  
25  
26  
27  
28  
29  
30  
31  
32  
33  
34  
35  
36  
37  
38  
39  
40  
41  
42  
43  
44  
45  
46  
47  
48  
49  
50  
51  
52  
53  
54  
55  
56  
57  
58  
59  
60

23. Schmidt M, Schmidt SA, Sandegaard JL, et al. The Danish National Patient Registry: a review of content, data quality, and research potential. *Clinical epidemiology*. 2015;7:449-90.
24. Bock C, Bukh JD, Vinberg M, et al. Validity of the diagnosis of a single depressive episode in a case register. *Clin Pract Epidemiol Ment Health*. 2009;5:4.
25. Jakobsen KD, Frederiksen JN, Hansen T, et al. Reliability of clinical ICD-10 schizophrenia diagnoses. *Nord J Psychiatry*. 2005;59(3):209-12.
26. Larsen JR, Siersma VD, Davidsen AS, et al. The excess mortality of patients with diabetes and concurrent psychiatric illness is markedly reduced by structured personal diabetes care: A 19-year follow up of the randomized controlled study Diabetes Care in General Practice (DCGP). *Gen Hosp Psychiatry*. 2016;38:42-52.

## Supplementary File 4 Prevalence of symptoms for the ten morbidity domains and for the group without diagnoses.

| Symptom                 | Total |       | No diagnosis |      | LUNG |      | MUSKULO SKELETAL |      | ENDO |      | MENTAL HEALTH |      | CANCER |      | NEURO |      | GASTRO |      | HEART |      | KIDNEY |      | SENSORY |      |
|-------------------------|-------|-------|--------------|------|------|------|------------------|------|------|------|---------------|------|--------|------|-------|------|--------|------|-------|------|--------|------|---------|------|
|                         | N     | %     | N            | %    | N    | %    | N                | %    | N    | %    | N             | %    | N      | %    | N     | %    | N      | %    | N     | %    | N      | %    | N       | %    |
| Total                   | 47452 | 100.0 | 30225        | 63.7 | 1595 | 3.4  | 6957             | 14.7 | 2214 | 4.7  | 471           | 1.0  | 2457   | 5.2  | 1679  | 3.5  | 2202   | 4.6  | 3878  | 8.2  | 1067   | 2.3  | 2614    | 5.5  |
| No symptom              | 4224  | 8.9   | 2990         | 9.9  | 72   | 4.5  | 475              | 6.8  | 136  | 6.1  | 27            | 5.7  | 195    | 7.9  | 93    | 5.5  | 104    | 4.7  | 281   | 7.2  | 68     | 6.4  | 209     | 8.0  |
| Tiredness               | 23252 | 49.0  | 14598        | 48.3 | 914  | 57.3 | 3422             | 49.2 | 1211 | 54.7 | 271           | 57.5 | 1226   | 49.9 | 965   | 57.5 | 1294   | 58.8 | 1896  | 48.9 | 632    | 59.2 | 1155    | 44.2 |
| Night-time urination    | 23122 | 48.7  | 13136        | 43.5 | 919  | 57.6 | 4126             | 59.3 | 1353 | 61.1 | 291           | 61.8 | 1408   | 57.3 | 991   | 59.0 | 1265   | 57.4 | 2520  | 65.0 | 588    | 55.1 | 1646    | 63.0 |
| Lack of energy          | 17623 | 37.1  | 10962        | 36.3 | 744  | 46.6 | 2671             | 38.4 | 888  | 40.1 | 229           | 48.6 | 943    | 38.4 | 728   | 43.4 | 1013   | 46.0 | 1477  | 38.1 | 483    | 45.3 | 894     | 34.2 |
| Headache                | 16969 | 35.8  | 11294        | 37.4 | 558  | 35.0 | 2316             | 33.3 | 667  | 30.1 | 149           | 31.6 | 736    | 30.0 | 651   | 38.8 | 942    | 42.8 | 986   | 25.4 | 447    | 41.9 | 624     | 23.9 |
| Back pain               | 15200 | 32.0  | 8689         | 28.7 | 617  | 38.7 | 3256             | 46.8 | 791  | 35.7 | 189           | 40.1 | 758    | 30.9 | 575   | 34.2 | 949    | 43.1 | 1373  | 35.4 | 444    | 41.6 | 900     | 34.4 |
| Abdominal bloating      | 13951 | 29.4  | 8886         | 29.4 | 540  | 33.9 | 2024             | 29.1 | 662  | 29.9 | 112           | 23.8 | 665    | 27.1 | 507   | 30.2 | 931    | 42.3 | 1022  | 26.4 | 385    | 36.1 | 626     | 23.9 |
| Memory problems         | 9365  | 19.7  | 5254         | 17.4 | 440  | 27.6 | 1639             | 23.6 | 533  | 24.1 | 186           | 39.5 | 578    | 23.5 | 566   | 33.7 | 644    | 29.2 | 912   | 23.5 | 300    | 28.1 | 656     | 25.1 |
| Abdominal pain          | 9189  | 19.4  | 5491         | 18.2 | 395  | 24.8 | 1487             | 21.4 | 455  | 20.6 | 107           | 22.7 | 500    | 20.4 | 382   | 22.8 | 825    | 37.5 | 724   | 18.7 | 292    | 27.4 | 453     | 17.3 |
| Coughing                | 8396  | 17.7  | 5033         | 16.7 | 598  | 37.5 | 1341             | 19.3 | 442  | 20.0 | 145           | 30.8 | 422    | 17.2 | 343   | 20.4 | 478    | 21.7 | 757   | 19.5 | 233    | 21.8 | 471     | 18.0 |
| Concentration problems  | 8154  | 17.2  | 4940         | 16.3 | 339  | 21.3 | 1263             | 18.2 | 417  | 18.8 | 165           | 35.0 | 455    | 18.5 | 454   | 27.0 | 563    | 25.6 | 636   | 16.4 | 245    | 23.0 | 412     | 15.8 |
| Change in stool texture | 8055  | 17.0  | 4900         | 16.2 | 341  | 21.4 | 1257             | 18.1 | 414  | 18.7 | 105           | 22.3 | 418    | 17.0 | 323   | 19.2 | 565    | 25.7 | 687   | 17.7 | 240    | 22.5 | 427     | 16.3 |
| Dizziness               | 7476  | 15.8  | 4138         | 13.7 | 355  | 22.3 | 1313             | 18.9 | 476  | 21.5 | 116           | 24.6 | 426    | 17.3 | 459   | 27.3 | 521    | 23.7 | 877   | 22.6 | 242    | 22.7 | 560     | 21.4 |
| Feeling unwell          | 6903  | 14.6  | 4240         | 14.0 | 333  | 20.9 | 1065             | 15.3 | 387  | 17.5 | 92            | 19.5 | 350    | 14.2 | 303   | 18.0 | 503    | 22.8 | 547   | 14.1 | 214    | 20.1 | 332     | 12.7 |
| Constipation            | 6847  | 14.4  | 3891         | 12.9 | 277  | 17.4 | 1207             | 17.3 | 389  | 17.6 | 78            | 16.6 | 426    | 17.3 | 352   | 21.0 | 449    | 20.4 | 695   | 17.9 | 256    | 24.0 | 402     | 15.4 |

|    |                                    |      |      |      |      |     |      |      |      |     |      |     |      |     |      |     |      |     |      |     |      |     |      |     |      |
|----|------------------------------------|------|------|------|------|-----|------|------|------|-----|------|-----|------|-----|------|-----|------|-----|------|-----|------|-----|------|-----|------|
| 1  |                                    |      |      |      |      |     |      |      |      |     |      |     |      |     |      |     |      |     |      |     |      |     |      |     |      |
| 2  | Increase in waist circumference    | 6223 | 13.1 | 3774 | 12.5 | 279 | 17.5 | 985  | 14.2 | 295 | 13.3 | 70  | 14.9 | 308 | 12.5 | 238 | 14.2 | 428 | 19.4 | 514 | 13.3 | 212 | 19.9 | 320 | 12.2 |
| 3  |                                    |      |      |      |      |     |      |      |      |     |      |     |      |     |      |     |      |     |      |     |      |     |      |     |      |
| 4  | Change in stool frequency          | 6107 | 12.9 | 3634 | 12.0 | 262 | 16.4 | 999  | 14.4 | 345 | 15.6 | 74  | 15.7 | 349 | 14.2 | 247 | 14.7 | 444 | 20.2 | 542 | 14.0 | 189 | 17.7 | 357 | 13.7 |
| 5  |                                    |      |      |      |      |     |      |      |      |     |      |     |      |     |      |     |      |     |      |     |      |     |      |     |      |
| 6  | Diarrhoea                          | 6020 | 12.7 | 3700 | 12.2 | 276 | 17.3 | 925  | 13.3 | 316 | 14.3 | 77  | 16.3 | 320 | 13.0 | 225 | 13.4 | 502 | 22.8 | 464 | 12.0 | 171 | 16.0 | 260 | 9.9  |
| 7  |                                    |      |      |      |      |     |      |      |      |     |      |     |      |     |      |     |      |     |      |     |      |     |      |     |      |
| 8  | Nausea                             | 5884 | 12.4 | 3509 | 11.6 | 269 | 16.9 | 941  | 13.5 | 334 | 15.1 | 92  | 19.5 | 350 | 14.2 | 280 | 16.7 | 446 | 20.3 | 480 | 12.4 | 212 | 19.9 | 258 | 9.9  |
| 9  |                                    |      |      |      |      |     |      |      |      |     |      |     |      |     |      |     |      |     |      |     |      |     |      |     |      |
| 10 | Swollen legs                       | 5852 | 12.3 | 2634 | 8.7  | 369 | 23.1 | 1481 | 21.3 | 530 | 23.9 | 89  | 18.9 | 456 | 18.6 | 344 | 20.5 | 405 | 18.4 | 913 | 23.5 | 275 | 25.8 | 498 | 19.1 |
| 11 |                                    |      |      |      |      |     |      |      |      |     |      |     |      |     |      |     |      |     |      |     |      |     |      |     |      |
| 12 | Difficulty in emptying the bladder | 5542 | 11.7 | 2765 | 9.1  | 292 | 18.3 | 1146 | 16.5 | 358 | 16.2 | 102 | 21.7 | 361 | 14.7 | 347 | 20.7 | 408 | 18.5 | 751 | 19.4 | 216 | 20.2 | 505 | 19.3 |
| 13 |                                    |      |      |      |      |     |      |      |      |     |      |     |      |     |      |     |      |     |      |     |      |     |      |     |      |
| 14 | Frequent urination                 | 4972 | 10.5 | 2641 | 8.7  | 228 | 14.3 | 970  | 13.9 | 327 | 14.8 | 106 | 22.5 | 342 | 13.9 | 298 | 17.7 | 325 | 14.8 | 632 | 16.3 | 162 | 15.2 | 398 | 15.2 |
| 15 |                                    |      |      |      |      |     |      |      |      |     |      |     |      |     |      |     |      |     |      |     |      |     |      |     |      |
| 16 | Stress incontinence                | 4639 | 9.8  | 2511 | 8.3  | 253 | 15.9 | 991  | 14.2 | 298 | 13.5 | 50  | 10.6 | 350 | 14.2 | 200 | 11.9 | 297 | 13.5 | 415 | 10.7 | 279 | 26.1 | 312 | 11.9 |
| 17 |                                    |      |      |      |      |     |      |      |      |     |      |     |      |     |      |     |      |     |      |     |      |     |      |     |      |
| 18 | Shortness of breath                | 3782 | 8.0  | 1670 | 5.5  | 659 | 41.3 | 861  | 12.4 | 264 | 11.9 | 105 | 22.3 | 214 | 8.7  | 218 | 13.0 | 304 | 13.8 | 641 | 16.5 | 140 | 13.1 | 323 | 12.4 |
| 19 |                                    |      |      |      |      |     |      |      |      |     |      |     |      |     |      |     |      |     |      |     |      |     |      |     |      |
| 20 | Hoarseness                         | 3630 | 7.7  | 2000 | 6.6  | 291 | 18.2 | 630  | 9.1  | 231 | 10.4 | 59  | 12.5 | 220 | 9.0  | 196 | 11.7 | 236 | 10.7 | 417 | 10.8 | 124 | 11.6 | 264 | 10.1 |
| 21 |                                    |      |      |      |      |     |      |      |      |     |      |     |      |     |      |     |      |     |      |     |      |     |      |     |      |
| 22 | Urge incontinence                  | 2976 | 6.3  | 1296 | 4.3  | 162 | 10.2 | 766  | 11.0 | 234 | 10.6 | 61  | 13.0 | 227 | 9.2  | 219 | 13.0 | 216 | 9.8  | 454 | 11.7 | 193 | 18.1 | 331 | 12.7 |
| 23 |                                    |      |      |      |      |     |      |      |      |     |      |     |      |     |      |     |      |     |      |     |      |     |      |     |      |
| 24 | Loss of appetite                   | 2902 | 6.1  | 1609 | 5.3  | 182 | 11.4 | 513  | 7.4  | 190 | 8.6  | 95  | 20.2 | 201 | 8.2  | 192 | 11.4 | 247 | 11.2 | 288 | 7.4  | 92  | 8.6  | 174 | 6.7  |
| 25 |                                    |      |      |      |      |     |      |      |      |     |      |     |      |     |      |     |      |     |      |     |      |     |      |     |      |
| 26 | Blood in stool/rectal bleeding     | 2141 | 4.5  | 1343 | 4.4  | 89  | 5.6  | 300  | 4.3  | 93  | 4.2  | 26  | 5.5  | 105 | 4.3  | 87  | 5.2  | 160 | 7.3  | 183 | 4.7  | 58  | 5.4  | 114 | 4.4  |
| 27 |                                    |      |      |      |      |     |      |      |      |     |      |     |      |     |      |     |      |     |      |     |      |     |      |     |      |
| 28 | Fever                              | 1805 | 3.8  | 1184 | 3.9  | 76  | 4.8  | 258  | 3.7  | 80  | 3.6  | 20  | 4.2  | 81  | 3.3  | 65  | 3.9  | 108 | 4.9  | 115 | 3.0  | 48  | 4.5  | 80  | 3.1  |
| 29 |                                    |      |      |      |      |     |      |      |      |     |      |     |      |     |      |     |      |     |      |     |      |     |      |     |      |
| 30 | Difficulty swallowing              | 1665 | 3.5  | 843  | 2.8  | 111 | 7.0  | 321  | 4.6  | 122 | 5.5  | 36  | 7.6  | 117 | 4.8  | 123 | 7.3  | 156 | 7.1  | 207 | 5.3  | 66  | 6.2  | 124 | 4.7  |
| 31 |                                    |      |      |      |      |     |      |      |      |     |      |     |      |     |      |     |      |     |      |     |      |     |      |     |      |
| 32 | Weight loss                        | 1405 | 3.0  | 734  | 2.4  | 83  | 5.2  | 279  | 4.0  | 99  | 4.5  | 39  | 8.3  | 112 | 4.6  | 107 | 6.4  | 125 | 5.7  | 167 | 4.3  | 41  | 3.8  | 90  | 3.4  |
| 33 |                                    |      |      |      |      |     |      |      |      |     |      |     |      |     |      |     |      |     |      |     |      |     |      |     |      |
| 34 | Incontinence without               | 1136 | 2.4  | 441  | 1.5  | 74  | 4.6  | 293  | 4.2  | 92  | 4.2  | 37  | 7.9  | 111 | 4.5  | 88  | 5.2  | 110 | 5.0  | 165 | 4.3  | 137 | 12.8 | 141 | 5.4  |
| 35 |                                    |      |      |      |      |     |      |      |      |     |      |     |      |     |      |     |      |     |      |     |      |     |      |     |      |
| 36 |                                    |      |      |      |      |     |      |      |      |     |      |     |      |     |      |     |      |     |      |     |      |     |      |     |      |
| 37 |                                    |      |      |      |      |     |      |      |      |     |      |     |      |     |      |     |      |     |      |     |      |     |      |     |      |
| 38 |                                    |      |      |      |      |     |      |      |      |     |      |     |      |     |      |     |      |     |      |     |      |     |      |     |      |
| 39 |                                    |      |      |      |      |     |      |      |      |     |      |     |      |     |      |     |      |     |      |     |      |     |      |     |      |
| 40 |                                    |      |      |      |      |     |      |      |      |     |      |     |      |     |      |     |      |     |      |     |      |     |      |     |      |
| 41 |                                    |      |      |      |      |     |      |      |      |     |      |     |      |     |      |     |      |     |      |     |      |     |      |     |      |
| 42 |                                    |      |      |      |      |     |      |      |      |     |      |     |      |     |      |     |      |     |      |     |      |     |      |     |      |
| 43 |                                    |      |      |      |      |     |      |      |      |     |      |     |      |     |      |     |      |     |      |     |      |     |      |     |      |
| 44 |                                    |      |      |      |      |     |      |      |      |     |      |     |      |     |      |     |      |     |      |     |      |     |      |     |      |
| 45 |                                    |      |      |      |      |     |      |      |      |     |      |     |      |     |      |     |      |     |      |     |      |     |      |     |      |
| 46 |                                    |      |      |      |      |     |      |      |      |     |      |     |      |     |      |     |      |     |      |     |      |     |      |     |      |

1  
2  
3  
4  
5  
6  
7  
8  
9  
10  
11  
12  
13  
14  
15  
16  
17  
18  
19  
20  
21  
22  
23  
24  
25  
26  
27  
28  
29  
30  
31  
32  
33  
34  
35  
36  
37  
38  
39  
40  
41  
42  
43  
44  
45  
46

|                             |     |     |     |     |    |     |     |     |    |     |      |      |     |     |     |     |     |     |     |     |      |      |     |     |  |
|-----------------------------|-----|-----|-----|-----|----|-----|-----|-----|----|-----|------|------|-----|-----|-----|-----|-----|-----|-----|-----|------|------|-----|-----|--|
| stress/urge                 |     |     |     |     |    |     |     |     |    |     |      |      |     |     |     |     |     |     |     |     |      |      |     |     |  |
| Pain/burning when urinating | 971 | 2.0 | 483 | 1.6 | 48 | 3.0 | 211 | 3.0 | 71 | 3.2 | 10   | 2.1  | 83  | 3.4 | 55  | 3.3 | 86  | 3.9 | 118 | 3.0 | 54   | 5.1  | 76  | 2.9 |  |
| Lump/swollen lymph node     | 753 | 1.6 | 456 | 1.5 | 35 | 2.2 | 117 | 1.7 | 39 | 1.8 | 12   | 2.5  | 63  | 2.6 | 26  | 1.5 | 47  | 2.1 | 58  | 1.5 | 29   | 2.7  | 30  | 1.1 |  |
| Black stool                 | 725 | 1.5 | 421 | 1.4 | 46 | 2.9 | 111 | 1.6 | 48 | 2.2 | 16   | 3.4  | 39  | 1.6 | 33  | 2.0 | 58  | 2.6 | 69  | 1.8 | 15   | 1.4  | 47  | 1.8 |  |
| Repeated vomiting           | 586 | 1.2 | 316 | 1.0 | 34 | 2.1 | 115 | 1.7 | 46 | 2.1 | 27   | 5.7  | 41  | 1.7 | 34  | 2.0 | 54  | 2.5 | 53  | 1.4 | 29   | 2.7  | 32  | 1.2 |  |
| Blood in urine              | 264 | 0.6 | 117 | 0.4 | 16 | 1.0 | 70  | 1.0 | 19 | 0.9 | 4    | 0.8  | 17  | 0.7 | 18  | 1.1 | 14  | 0.6 | 47  | 1.2 | 22   | 2.1  | 21  | 0.8 |  |
| Coughing up blood           | 58  | 0.1 | 35  | 0.1 | 6  | 0.4 | 8   | 0.1 | 4  | 0.2 | none | none | few |     | few |     | few |     | 6   | 0.2 | few  | 0    | 4   | 0.2 |  |
| Blood in vomit              | 47  | 0.1 | 27  | 0.1 | 4  | 0.3 | 10  | 0.1 | 6  | 0.3 | few  |      | few |     | few |     | 7   | 0.3 | 5   | 0.1 | none | none | few |     |  |

LUNG = lung diagnoses, MUSCULOSKELETAL = musculoskeletal diagnoses, ENDO = endocrine diagnoses, MENTAL HEALTH = mental health diagnoses, CANCER = cancer diagnoses, NEURO = neurological diagnoses, GASTRO = gastrointestinal diagnoses, HEART = cardiovascular diagnoses, KIDNEY = genitourinary diagnoses, SENSORY = sensory organ diagnoses

**Supplementary Table A.** Mean number of symptoms for each morbidity domain with number of symptoms, interference with usual daily activities and concern of the symptoms.

|                     | Number of symptoms<br>(mean number) | Interference with usual<br>daily activities<br>(mean impairment<br>score) <sup>α</sup> | Concern about<br>symptoms<br>(mean worry score) <sup>×</sup> |
|---------------------|-------------------------------------|----------------------------------------------------------------------------------------|--------------------------------------------------------------|
| LUNG                | 7.3                                 | 2.6                                                                                    | 2.0                                                          |
| MUSCULOSKELETAL     | 6.0                                 | 2.3                                                                                    | 1.7                                                          |
| ENDO                | 6.1                                 | 2.3                                                                                    | 1.7                                                          |
| MENTAL HEALTH       | 7.4                                 | 2.8                                                                                    | 2.2                                                          |
| CANCER              | 5.6                                 | 2.1                                                                                    | 1.5                                                          |
| NEURO               | 6.8                                 | 2.4                                                                                    | 1.8                                                          |
| GASTRO              | 7.4                                 | 2.5                                                                                    | 1.9                                                          |
| HEART               | 5.9                                 | 2.2                                                                                    | 1.7                                                          |
| KIDNEY              | 7.3                                 | 2.5                                                                                    | 1.9                                                          |
| SENSORY             | 5.5                                 | 2.1                                                                                    | 1.3                                                          |
| <b>No diagnosis</b> | 4.8                                 | 1.7                                                                                    | 1.2                                                          |
| <b>Total</b>        | 5.2                                 | 1.9                                                                                    | 1.3                                                          |

LUNG = lung diagnoses. MUSCULOSKELETAL = musculoskeletal diagnoses. ENDO = endocrine diagnoses. MENTAL HEALTH = psychiatric diagnoses. CANCER = cancer diagnoses. NEURO = neurological diagnoses. GASTRO = gastrointestinal diagnoses. HEART = cardiovascular diagnoses. KIDNEY = genitourinary diagnoses. SENSORY = sensory organ diagnoses.

<sup>α</sup> Mean activity score. Derived from the question: ‘within the last 4 weeks: to what extent did you experience that the following symptoms or discomfort interfered your usual daily activities?’ with the following response categories: not at all, slightly, moderate, quite a bit, extremely. The response categories were transformed in to a numeric 4 digit scale where e.g. 4 is worse than 2.

<sup>×</sup> Mean worry score. Derived from the question: ‘within the last 4 weeks: to what extent were you concerned about the following symptoms or discomfort?’ with the following response categories: not at all, slightly, moderate, quite a bit, extremely. The response categories were transformed in to a numeric 4 digit scale where e.g. 4 is worse than 2.

1  
2  
3  
4  
5  
6  
7  
8  
9  
10  
11  
12  
13  
14  
15  
16  
17  
18  
19  
20  
21  
22  
23  
24  
25  
26  
27  
28  
29  
30  
31  
32  
33  
34  
35  
36  
37  
38  
39  
40  
41  
42  
43  
44  
45  
46

For peer review only



**Supplementary Table B.** Mean difference in number of symptoms (with 95%CI) for the respondents having the indicated combination of morbidity domains relative to the respondent having no morbidity.

|                     | LUNG                  | MUSCULO<br>SKELETAL   | ENDO                  | MENTAL<br>HEALTH       | CANCER                 | NEURO                  | GASTRO                | HEART                 | KIDNEY                  | SENSORY                |
|---------------------|-----------------------|-----------------------|-----------------------|------------------------|------------------------|------------------------|-----------------------|-----------------------|-------------------------|------------------------|
| LUNG                | 1.88<br>(1.57 ; 2.18) | 2.00<br>(1.43 ; 2.57) | 2.03<br>(0.69 ; 3.37) | 7.42<br>(4.99 ; 9.85)  | 1.00<br>(-0.45 ; 2.45) | 2.94<br>(1.34 ; 4.54)  | 2.94<br>(1.89 ; 3.98) | 2.82<br>(2.03 ; 3.61) | 2.97<br>(0.91 ; 5.02)   | 2.70<br>(1.49 ; 3.92)  |
| MUSCULO<br>SKELETAL |                       | 0.81<br>(0.67 ; 0.94) | 1.29<br>(0.76 ; 1.81) | 3.05<br>(1.64 ; 4.45)  | 1.01<br>(0.52 ; 1.5)   | 1.84<br>(1.22 ; 2.45)  | 2.94<br>(2.47 ; 3.41) | 2.00<br>(1.63 ; 2.38) | 2.93<br>(2.16 ; 3.70)   | 1.44<br>(1.03 ; 1.84)  |
| ENDO                |                       |                       | 0.65<br>(0.38 ; 0.91) | 0.46<br>(-1.46 ; 2.38) | 0.86<br>(-0.13 ; 1.84) | 2.36<br>(1.21 ; 3.51)  | 1.92<br>(0.90 ; 2.93) | 1.63<br>(1.10 ; 2.17) | 1.58<br>(0.20 ; 2.96)   | 0.77<br>(-0.22 ; 1.76) |
| MENTAL<br>HEALTH    |                       |                       |                       | 2.02<br>(1.41 ; 2.63)  | 3.90<br>(1.47 ; 6.33)  | 1.08<br>(-0.73 ; 2.89) | 2.58<br>(1.15 ; 4.01) | 2.46<br>(0.78 ; 4.14) | 1.89<br>(-2.54 ; 6.33)  | 3.42<br>(0.29 ; 6.56)  |
| CANCER              |                       |                       |                       |                        | 0.36<br>(0.14 ; 0.59)  | 1.70<br>(0.79 ; 2.62)  | 2.70<br>(1.68 ; 3.71) | 2.15<br>(1.50 ; 2.8)  | -0.59<br>(-1.94 ; 0.77) | 2.15<br>(1.33 ; 2.97)  |
| NEURO               |                       |                       |                       |                        |                        | 1.08<br>(0.78 ; 1.38)  | 2.55<br>(1.28 ; 3.81) | 2.12<br>(1.37 ; 2.86) | 2.95<br>(1.41 ; 4.48)   | 1.44<br>(0.36 ; 2.52)  |
| GASTRO              |                       |                       |                       |                        |                        |                        | 1.96<br>(1.71 ; 2.21) | 2.50<br>(1.76 ; 3.23) | 4.44<br>(3.19 ; 5.68)   | 1.60<br>(0.48 ; 2.72)  |
| HEART               |                       |                       |                       |                        |                        |                        |                       | 0.89<br>(0.68 ; 1.09) | 1.57<br>(0.60 ; 2.53)   | 1.07<br>(0.49 ; 1.65)  |
| KIDNEY              |                       |                       |                       |                        |                        |                        |                       |                       | 1.83<br>(1.47 ; 2.19)   | 3.05<br>(1.44 ; 4.65)  |
| SENSORY             |                       |                       |                       |                        |                        |                        |                       |                       |                         | 0.71<br>(0.47 ; 0.94)  |

**Supplementary Table C.** Excess mean number of symptoms (with 95%CI) for the respondents having the indicated combination of morbidity domains relative to the added mean number of symptoms from two respondents having each morbidity of the combination separately.

|                     | LUNG | MUSCULO<br>SKELETAL      | ENDO                    | MENTAL<br>HEALTH         | CANCER                  | NEURO                    | GASTRO                  | HEART                   | KIDNEY                   | SENSORY                 |
|---------------------|------|--------------------------|-------------------------|--------------------------|-------------------------|--------------------------|-------------------------|-------------------------|--------------------------|-------------------------|
| LUNG                |      | -0.68<br>(-1.35 ; -0.02) | -0.50<br>(-1.89 ; 0.9)  | 3.52<br>(1.00 ; 6.05)    | -1.24<br>(-2.74 ; 0.26) | -0.02<br>(-1.67 ; 1.64)  | -0.90<br>(-2.02 ; 0.22) | 0.06<br>(-0.81 ; 0.93)  | -0.74<br>(-2.85 ; 1.37)  | 0.12<br>(-1.16 ; 1.40)  |
| MUSCULO<br>SKELETAL |      |                          | -0.17<br>(-0.77 ; 0.43) | 0.22<br>(-1.32 ; 1.75)   | -0.16<br>(-0.71 ; 0.39) | -0.05<br>(-0.75 ; 0.64)  | 0.17<br>(-0.38 ; 0.72)  | 0.31<br>(-0.14 ; 0.76)  | 0.29<br>(-0.57 ; 1.15)   | -0.08<br>(-0.56 ; 0.41) |
| ENDO                |      |                          |                         | -2.21<br>(-4.24 ; -0.18) | -0.16<br>(-1.20 ; 0.89) | 0.63<br>(-0.58 ; 1.85)   | -0.69<br>(-1.77 ; 0.39) | 0.10<br>(-0.53 ; 0.73)  | -0.90<br>(-2.35 ; 0.56)  | -0.59<br>(-1.63 ; 0.46) |
| MENTAL<br>HEALTH    |      |                          |                         |                          | 1.51<br>(-1.00 ; 4.03)  | -2.02<br>(-3.96 ; -0.09) | -1.40<br>(-2.97 ; 0.17) | -0.45<br>(-2.24 ; 1.35) | -1.96<br>(-6.45 ; 2.53)  | 0.69<br>(-2.51 ; 3.90)  |
| CANCER              |      |                          |                         |                          |                         | 0.26<br>(-0.73 ; 1.24)   | 0.37<br>(-0.70 ; 1.44)  | 0.90<br>(0.18 ; 1.62)   | -2.78<br>(-4.20 ; -1.36) | 1.08<br>(0.19 ; 1.96)   |
| NEURO               |      |                          |                         |                          |                         |                          | -0.50<br>(-1.82 ; 0.83) | 0.15<br>(-0.68 ; 0.98)  | 0.03<br>(-1.57 ; 1.64)   | -0.35<br>(-1.49 ; 0.79) |
| GASTRO              |      |                          |                         |                          |                         |                          |                         | -0.35<br>(-1.15 ; 0.46) | 0.65<br>(-0.68 ; 1.97)   | -1.07<br>(-2.24 ; 0.10) |
| HEART               |      |                          |                         |                          |                         |                          |                         |                         | -1.15<br>(-2.20 ; -0.10) | -0.52<br>(-1.18 ; 0.13) |
| KIDNEY              |      |                          |                         |                          |                         |                          |                         |                         |                          | 0.51<br>(-1.15 ; 2.17)  |
| SENSORY             |      |                          |                         |                          |                         |                          |                         |                         |                          |                         |

1  
2  
3  
4  
5  
6  
7  
8  
9  
10  
11  
12  
13  
14  
15  
16  
17  
18  
19  
20  
21  
22  
23  
24  
25  
26  
27  
28  
29  
30  
31  
32  
33  
34  
35  
36  
37  
38  
39  
40  
41  
42  
43  
44  
45  
46

**Supplementary Table D.** Mean difference in impairment score (with 95% CI) for the respondents having the indicated combination of morbidity domains relative to the respondent having no morbidity.

|                  | LUNG                  | MUSCULO SKELETAL      | ENDO                  | MENTAL HEALTH          | CANCER                 | NEURO                 | GASTRO                | HEART                 | KIDNEY                 | SENSORY               |
|------------------|-----------------------|-----------------------|-----------------------|------------------------|------------------------|-----------------------|-----------------------|-----------------------|------------------------|-----------------------|
| LUNG             | 0.54<br>(0.44 ; 0.64) | 0.84<br>(0.66 ; 1.03) | 0.70<br>(0.27 ; 1.13) | 1.02<br>(0.24 ; 1.81)  | 0.61<br>(0.13 ; 1.08)  | 0.87<br>(0.36 ; 1.39) | 0.65<br>(0.32 ; 0.99) | 0.77<br>(0.51 ; 1.02) | 0.54<br>(-0.13 ; 1.20) | 0.80<br>(0.40 ; 1.21) |
| MUSCULO SKELETAL |                       | 0.37<br>(0.32 ; 0.41) | 0.45<br>(0.28 ; 0.62) | 1.11<br>(0.66 ; 1.56)  | 0.39<br>(0.23 ; 0.55)  | 0.54<br>(0.34 ; 0.74) | 0.73<br>(0.58 ; 0.89) | 0.66<br>(0.54 ; 0.78) | 0.99<br>(0.74 ; 1.24)  | 0.63<br>(0.50 ; 0.76) |
| ENDO             |                       |                       | 0.23<br>(0.14 ; 0.32) | 0.51<br>(-0.13 ; 1.15) | 0.24<br>(-0.08 ; 0.55) | 0.88<br>(0.51 ; 1.25) | 0.44<br>(0.11 ; 0.77) | 0.56<br>(0.39 ; 0.73) | 0.27<br>(-0.18 ; 0.71) | 0.59<br>(0.27 ; 0.91) |
| MENTAL HEALTH    |                       |                       |                       | 0.75<br>(0.56 ; 0.95)  | 1.07<br>(0.28 ; 1.85)  | 0.75<br>(0.15 ; 1.35) | 0.94<br>(0.48 ; 1.40) | 1.01<br>(0.47 ; 1.55) | 1.43<br>(0.00 ; 2.86)  | 1.69<br>(0.59 ; 2.80) |
| CANCER           |                       |                       |                       |                        | 0.15<br>(0.08 ; 0.23)  | 0.58<br>(0.29 ; 0.88) | 0.68<br>(0.35 ; 1.01) | 0.53<br>(0.32 ; 0.74) | 0.04<br>(-0.40 ; 0.48) | 0.74<br>(0.47 ; 1.01) |
| NEURO            |                       |                       |                       |                        |                        | 0.38<br>(0.28 ; 0.48) | 0.61<br>(0.20 ; 1.02) | 0.77<br>(0.53 ; 1.01) | 0.50<br>(-0.01 ; 1.02) | 0.58<br>(0.23 ; 0.93) |
| GASTRO           |                       |                       |                       |                        |                        |                       | 0.49<br>(0.41 ; 0.57) | 0.60<br>(0.36 ; 0.84) | 0.80<br>(0.40 ; 1.21)  | 0.70<br>(0.33 ; 1.06) |
| HEART            |                       |                       |                       |                        |                        |                       |                       | 0.25<br>(0.19 ; 0.32) | 0.34<br>(0.03 ; 0.66)  | 0.33<br>(0.14 ; 0.52) |
| KIDNEY           |                       |                       |                       |                        |                        |                       |                       |                       | 0.49<br>(0.37 ; 0.61)  | 1.03<br>(0.50 ; 1.56) |
| SENSORY          |                       |                       |                       |                        |                        |                       |                       |                       |                        | 0.26<br>(0.19 ; 0.34) |
|                  |                       |                       |                       |                        |                        |                       |                       |                       | 0 (0 ; 0)              |                       |

**Supplementary Table E.** Excess mean impairment score (with 95%CI) for the respondents having the indicated combination of morbidity domains relative to the added mean impairment score from two respondents having each morbidity of the combination separately.

|                     | LUNG | MUSCULO<br>SKELETAL     | ENDO                    | MENTAL<br>HEALTH        | CANCER                  | NEURO                   | GASTRO                   | HEART                   | KIDNEY                   | SENSORY                 |
|---------------------|------|-------------------------|-------------------------|-------------------------|-------------------------|-------------------------|--------------------------|-------------------------|--------------------------|-------------------------|
| LUNG                |      | -0.07<br>(-0.28 ; 0.15) | -0.07<br>(-0.53 ; 0.38) | -0.28<br>(-1.09 ; 0.54) | -0.09<br>(-0.58 ; 0.40) | -0.05<br>(-0.59 ; 0.48) | -0.38<br>(-0.74 ; -0.02) | -0.03<br>(-0.31 ; 0.25) | -0.49<br>(-1.18 ; 0.19)  | 0.00<br>(-0.43 ; 0.43)  |
| MUSCULO<br>SKELETAL |      |                         | -0.14<br>(-0.34 ; 0.05) | -0.01<br>(-0.50 ; 0.49) | -0.13<br>(-0.31 ; 0.05) | -0.20<br>(-0.43 ; 0.02) | -0.12<br>(-0.30 ; 0.06)  | 0.04<br>(-0.10 ; 0.19)  | 0.14<br>(-0.14 ; 0.42)   | 0.00<br>(-0.16 ; 0.16)  |
| ENDO                |      |                         |                         | -0.47<br>(-1.14 ; 0.21) | -0.15<br>(-0.49 ; 0.19) | 0.27<br>(-0.12 ; 0.66)  | -0.28<br>(-0.63 ; 0.07)  | 0.08<br>(-0.13 ; 0.28)  | -0.45<br>(-0.92 ; 0.02)  | 0.10<br>(-0.24 ; 0.44)  |
| MENTAL<br>HEALTH    |      |                         |                         |                         | 0.16<br>(-0.65 ; 0.97)  | -0.38<br>(-1.02 ; 0.26) | -0.30<br>(-0.81 ; 0.21)  | 0.01<br>(-0.57 ; 0.59)  | 0.19<br>(-1.26 ; 1.64)   | 0.68<br>(-0.45 ; 1.81)  |
| CANCER              |      |                         |                         |                         |                         | 0.05<br>(-0.27 ; 0.37)  | 0.03<br>(-0.31 ; 0.38)   | 0.13<br>(-0.10 ; 0.36)  | -0.60<br>(-1.06 ; -0.14) | 0.32<br>(0.04 ; 0.61)   |
| NEURO               |      |                         |                         |                         |                         |                         | -0.26<br>(-0.68 ; 0.17)  | 0.14<br>(-0.13 ; 0.41)  | -0.36<br>(-0.90 ; 0.18)  | -0.06<br>(-0.43 ; 0.31) |
| GASTRO              |      |                         |                         |                         |                         |                         |                          | -0.14<br>(-0.40 ; 0.12) | -0.18<br>(-0.60 ; 0.25)  | -0.05<br>(-0.44 ; 0.33) |
| HEART               |      |                         |                         |                         |                         |                         |                          |                         | -0.40<br>(-0.74 ; -0.05) | -0.18<br>(-0.39 ; 0.03) |
| KIDNEY              |      |                         |                         |                         |                         |                         |                          |                         |                          | 0.28<br>(-0.27 ; 0.83)  |
| SENSORY             |      |                         |                         |                         |                         |                         |                          |                         |                          |                         |

1  
2  
3  
4  
5  
6  
7  
8  
9  
10  
11  
12  
13  
14  
15  
16  
17  
18  
19  
20  
21  
22  
23  
24  
25  
26  
27  
28  
29  
30  
31  
32  
33  
34  
35  
36  
37  
38  
39  
40  
41  
42  
43  
44  
45  
46

**Supplementary Table F.** Mean difference in worry score (with 95%CI) for the respondents having the indicated combination of morbidity domains relative to the respondent having no morbidity.

|                  | LUNG                  | MUSCULO SKELETAL      | ENDO                  | MENTAL HEALTH          | CANCER                 | NEURO                 | GASTRO                | HEART                 | KIDNEY                  | SENSORY               |
|------------------|-----------------------|-----------------------|-----------------------|------------------------|------------------------|-----------------------|-----------------------|-----------------------|-------------------------|-----------------------|
| LUNG             | 0.52<br>(0.42 ; 0.62) | 0.65<br>(0.46 ; 0.83) | 0.91<br>(0.47 ; 1.34) | 0.95<br>(0.16 ; 1.74)  | 0.53<br>(0.05 ; 1.01)  | 0.93<br>(0.41 ; 1.45) | 0.65<br>(0.31 ; 0.99) | 0.79<br>(0.53 ; 1.04) | 0.19<br>(-0.47 ; 0.86)  | 0.94<br>(0.52 ; 1.36) |
| MUSCULO SKELETAL |                       | 0.36<br>(0.32 ; 0.4)  | 0.41<br>(0.24 ; 0.58) | 1.19<br>(0.73 ; 1.64)  | 0.40<br>(0.24 ; 0.56)  | 0.47<br>(0.27 ; 0.67) | 0.71<br>(0.56 ; 0.87) | 0.74<br>(0.62 ; 0.87) | 0.89<br>(0.64 ; 1.14)   | 0.60<br>(0.47 ; 0.73) |
| ENDO             |                       |                       | 0.22<br>(0.14 ; 0.31) | 0.41<br>(-0.23 ; 1.06) | 0.15<br>(-0.17 ; 0.47) | 0.89<br>(0.52 ; 1.26) | 0.41<br>(0.07 ; 0.75) | 0.45<br>(0.28 ; 0.63) | 0.08<br>(-0.37 ; 0.53)  | 0.59<br>(0.27 ; 0.91) |
| MENTAL HEALTH    |                       |                       |                       | 0.67<br>(0.47 ; 0.87)  | 1.68<br>(0.90 ; 2.47)  | 0.73<br>(0.12 ; 1.33) | 1.14<br>(0.68 ; 1.60) | 0.86<br>(0.32 ; 1.41) | 1.31<br>(-0.13 ; 2.75)  | 1.13<br>(0.02 ; 2.25) |
| CANCER           |                       |                       |                       |                        | 0.08<br>(0.01 ; 0.16)  | 0.74<br>(0.44 ; 1.04) | 0.42<br>(0.09 ; 0.75) | 0.50<br>(0.29 ; 0.72) | -0.02<br>(-0.46 ; 0.42) | 0.72<br>(0.45 ; 0.99) |
| NEURO            |                       |                       |                       |                        |                        | 0.29<br>(0.19 ; 0.39) | 0.51<br>(0.10 ; 0.92) | 0.64<br>(0.39 ; 0.88) | 0.16<br>(-0.37 ; 0.69)  | 0.54<br>(0.19 ; 0.89) |
| GASTRO           |                       |                       |                       |                        |                        |                       | 0.46<br>(0.37 ; 0.54) | 0.51<br>(0.26 ; 0.75) | 0.71<br>(0.30 ; 1.12)   | 0.59<br>(0.22 ; 0.96) |
| HEART            |                       |                       |                       |                        |                        |                       |                       | 0.25<br>(0.18 ; 0.31) | 0.19<br>(-0.13 ; 0.51)  | 0.38<br>(0.19 ; 0.57) |
| KIDNEY           |                       |                       |                       |                        |                        |                       |                       |                       | 0.46<br>(0.34 ; 0.58)   | 0.71<br>(0.17 ; 1.24) |
| SENSORY          |                       |                       |                       |                        |                        |                       |                       |                       |                         | 0.28<br>(0.20 ; 0.36) |

**Supplementary Table G.** Excess mean worry score (with 95% CI) for the respondents having the indicated combination of morbidity domains relative to the added mean worry score from two respondents having each morbidity of the combination separately.

|                     | LUNG | MUSCULO<br>SKELETAL      | ENDO                    | MENTAL<br>HEALTH        | CANCER                  | NEURO                   | GASTRO                  | HEART                   | KIDNEY                   | SENSORY                 |
|---------------------|------|--------------------------|-------------------------|-------------------------|-------------------------|-------------------------|-------------------------|-------------------------|--------------------------|-------------------------|
| LUNG                |      | -0.24<br>(-0.46 ; -0.02) | 0.16<br>(-0.30 ; 0.61)  | -0.24<br>(-1.06 ; 0.58) | -0.08<br>(-0.58 ; 0.42) | 0.12<br>(-0.42 ; 0.65)  | -0.33<br>(-0.69 ; 0.03) | 0.02<br>(-0.27 ; 0.30)  | -0.79<br>(-1.48 ; -0.11) | 0.13<br>(-0.30 ; 0.57)  |
| MUSCULO<br>SKELETAL |      |                          | -0.18<br>(-0.38 ; 0.02) | 0.16<br>(-0.34 ; 0.66)  | -0.05<br>(-0.23 ; 0.13) | -0.18<br>(-0.41 ; 0.05) | -0.11<br>(-0.29 ; 0.07) | 0.13<br>(-0.01 ; 0.28)  | 0.06<br>(-0.22 ; 0.34)   | -0.04<br>(-0.20 ; 0.12) |
| ENDO                |      |                          |                         | -0.48<br>(-1.16 ; 0.20) | -0.16<br>(-0.50 ; 0.18) | 0.37<br>(-0.02 ; 0.77)  | -0.27<br>(-0.63 ; 0.09) | -0.02<br>(-0.23 ; 0.19) | -0.61<br>(-1.08 ; -0.14) | 0.09<br>(-0.25 ; 0.43)  |
| MENTAL<br>HEALTH    |      |                          |                         |                         | 0.93<br>(0.11 ; 1.75)   | -0.23<br>(-0.87 ; 0.42) | 0.02<br>(-0.50 ; 0.53)  | -0.06<br>(-0.64 ; 0.53) | 0.18<br>(-1.28 ; 1.64)   | 0.18<br>(-0.95 ; 1.32)  |
| CANCER              |      |                          |                         |                         |                         | 0.37<br>(0.04 ; 0.69)   | -0.12<br>(-0.47 ; 0.23) | 0.17<br>(-0.06 ; 0.41)  | -0.57<br>(-1.03 ; -0.10) | 0.35<br>(0.06 ; 0.64)   |
| NEURO               |      |                          |                         |                         |                         |                         | -0.23<br>(-0.66 ; 0.20) | 0.10<br>(-0.17 ; 0.37)  | -0.59<br>(-1.15 ; -0.04) | -0.03<br>(-0.41 ; 0.34) |
| GASTRO              |      |                          |                         |                         |                         |                         |                         | -0.20<br>(-0.46 ; 0.07) | -0.21<br>(-0.64 ; 0.22)  | -0.15<br>(-0.53 ; 0.24) |
| HEART               |      |                          |                         |                         |                         |                         |                         |                         | -0.52<br>(-0.87 ; -0.17) | -0.15<br>(-0.36 ; 0.07) |
| KIDNEY              |      |                          |                         |                         |                         |                         |                         |                         |                          | -0.04<br>(-0.59 ; 0.51) |
| SENSORY             |      |                          |                         |                         |                         |                         |                         |                         |                          |                         |

STROBE Statement—Checklist of items that should be included in reports of *cohort studies*

|                           | Item No | Recommendation                                                                                                                                                                                                                                                                                                                                                                                                                                                                                                                                                                                                                                                                                                                                                                                                                                                                                                                                                                                                                                                                                                                                                                                                                                                                                       |
|---------------------------|---------|------------------------------------------------------------------------------------------------------------------------------------------------------------------------------------------------------------------------------------------------------------------------------------------------------------------------------------------------------------------------------------------------------------------------------------------------------------------------------------------------------------------------------------------------------------------------------------------------------------------------------------------------------------------------------------------------------------------------------------------------------------------------------------------------------------------------------------------------------------------------------------------------------------------------------------------------------------------------------------------------------------------------------------------------------------------------------------------------------------------------------------------------------------------------------------------------------------------------------------------------------------------------------------------------------|
| <b>Title and abstract</b> | 1       | <p>(a) Indicate the study's design with a commonly used term in the title or the abstract</p> <p>(b) Provide in the abstract an informative and balanced summary of what was done and what was found</p> <p>(a) <i>Symptom burden in multimorbidity. A population-based combined questionnaire and registry study from Denmark</i></p> <p>(b) <i>Please see page 2.</i></p>                                                                                                                                                                                                                                                                                                                                                                                                                                                                                                                                                                                                                                                                                                                                                                                                                                                                                                                          |
| Background/rationale      | 2       | <p>Explain the scientific background and rationale for the investigation being reported</p> <p><i>Please see page 4, the "Introduction".</i></p>                                                                                                                                                                                                                                                                                                                                                                                                                                                                                                                                                                                                                                                                                                                                                                                                                                                                                                                                                                                                                                                                                                                                                     |
| Objectives                | 3       | <p>State specific objectives, including any prespecified hypotheses</p> <p><i>Please see page 4.</i></p> <p><i>The aim of this study was to explore symptom burden in patients with one of ten morbidities compared with symptom burden in patients with multimorbidity. We hypothesised that symptom burden in multimorbidity was additive, ie that symptoms in patients with multimorbidity was equivalent to the sum of the symptoms attributable to the single morbidities.</i></p>                                                                                                                                                                                                                                                                                                                                                                                                                                                                                                                                                                                                                                                                                                                                                                                                              |
| <b>Methods</b>            |         |                                                                                                                                                                                                                                                                                                                                                                                                                                                                                                                                                                                                                                                                                                                                                                                                                                                                                                                                                                                                                                                                                                                                                                                                                                                                                                      |
| Study design              | 4       | <p>Present key elements of study design early in the paper</p> <p><i>Stated on page 4:</i><br/><i>"Study design and population"</i><br/><i>The study was a longitudinal cohort study. Participants were from the Danish Symptom Cohort, a population-based study conducted in Denmark in June-December, 2012.</i></p>                                                                                                                                                                                                                                                                                                                                                                                                                                                                                                                                                                                                                                                                                                                                                                                                                                                                                                                                                                                |
| Setting                   | 5       | <p>Describe the setting, locations, and relevant dates, including periods of recruitment, exposure, follow-up, and data collection</p> <p><i>Stated on page 4 in the section "Study design and population"</i><br/><i>People invited to participate in the study were living in Denmark on 1<sup>st</sup> January, 2012 (baseline). Of 100,000 adults (≥20 years) randomly selected from the general Danish population, 95,253 were eligible and invited to participate (Figure 1). Of these, 49,706 (52.2%) completed the study questionnaire (Supplementary File 1).(15)</i></p> <p><i>Furthermore, stated on page 6 in the section "Multimorbidity"</i><br/><i>"Information on diagnoses was retrieved from the nationwide health registries in the 10-year period preceding baseline (1st January, 2002-31st December, 2011). Participants were excluded if they had not been living continuously in Denmark during this 10-year period. Chronic disease diagnoses were grouped into ten domains: LUNG, MUSCULOSKELETAL, ENDOCRINE, MENTAL HEALTH, CANCER, NEUROLOGICAL, GASTROINTESTINAL, CARDIOVASCULAR, GENITOURINARY and SENSORY. In each domain, relevant diagnoses from the International Classification of Diseases, 10th edition (ICD-10) were included (Supplementary File 3)."</i></p> |
| Participants              | 6       | <p>(a) Give the eligibility criteria, and the sources and methods of selection of participants. Describe methods of follow-up</p>                                                                                                                                                                                                                                                                                                                                                                                                                                                                                                                                                                                                                                                                                                                                                                                                                                                                                                                                                                                                                                                                                                                                                                    |

(b) For matched studies, give matching criteria and number of exposed and unexposed

(a) Stated on page 4 and 5 in the section “Study design and population”

(b) Not applicable.

|                              |    |                                                                                                                                                                                                                                                                                                                                                                                                                                                                                                                                                                                                                                                                                                                                                                                                                                                           |
|------------------------------|----|-----------------------------------------------------------------------------------------------------------------------------------------------------------------------------------------------------------------------------------------------------------------------------------------------------------------------------------------------------------------------------------------------------------------------------------------------------------------------------------------------------------------------------------------------------------------------------------------------------------------------------------------------------------------------------------------------------------------------------------------------------------------------------------------------------------------------------------------------------------|
| Variables                    | 7  | Clearly define all outcomes, exposures, predictors, potential confounders, and effect modifiers. Give diagnostic criteria, if applicable                                                                                                                                                                                                                                                                                                                                                                                                                                                                                                                                                                                                                                                                                                                  |
|                              |    | <i>Please see page 5-6 and the sections “Symptom data” and “Symptom burden” and “Multimorbidity” and Table 1.</i>                                                                                                                                                                                                                                                                                                                                                                                                                                                                                                                                                                                                                                                                                                                                         |
| Data sources/<br>measurement | 8* | For each variable of interest, give sources of data and details of methods of assessment (measurement). Describe comparability of assessment methods if there is more than one group                                                                                                                                                                                                                                                                                                                                                                                                                                                                                                                                                                                                                                                                      |
|                              |    | <i>Please see page 4-6 in the Methods section.</i>                                                                                                                                                                                                                                                                                                                                                                                                                                                                                                                                                                                                                                                                                                                                                                                                        |
|                              |    | <i>“All Danish born and immigrant populations in Denmark have a unique personal identification number in the Danish Civil Registration System.(16) The register contains information about age, sex, vital status, etc, and enables information from different Danish registries to be linked. Information on diagnoses leading to either inpatient or outpatient care in the hospital sector was collected from the Danish National Patient Register,(17) the Danish Cancer Registry,(18) and the Danish Psychiatric Central Research Register.(19) Thus, only diagnoses from secondary care were included in the study. Information on education,(20) work status,(21) family income,(22) assets (banks, stocks, bonds, and housing),(22) degree of urbanisation, and cohabitation status was obtained from the nationwide registries at baseline.”</i> |
|                              |    | <i>“Information on diagnoses was retrieved from the nationwide health registries in the 10-year period preceding baseline (1st January, 2002-31st December, 2011). Participants were excluded if they had not been living continuously in Denmark during this 10-year period.”</i>                                                                                                                                                                                                                                                                                                                                                                                                                                                                                                                                                                        |
|                              |    | <i>Information on symptom burden is retrieved from the questionnaire.</i>                                                                                                                                                                                                                                                                                                                                                                                                                                                                                                                                                                                                                                                                                                                                                                                 |
| Bias                         | 9  | Describe any efforts to address potential sources of bias                                                                                                                                                                                                                                                                                                                                                                                                                                                                                                                                                                                                                                                                                                                                                                                                 |
|                              |    | <i>Please see page 4-6 in the “Methods” section and page 16 the section “Strengths and limitations”</i>                                                                                                                                                                                                                                                                                                                                                                                                                                                                                                                                                                                                                                                                                                                                                   |
| Study size                   | 10 | Explain how the study size was arrived at                                                                                                                                                                                                                                                                                                                                                                                                                                                                                                                                                                                                                                                                                                                                                                                                                 |
|                              |    | <i>Please see page 4.</i>                                                                                                                                                                                                                                                                                                                                                                                                                                                                                                                                                                                                                                                                                                                                                                                                                                 |
|                              |    | <i>“People invited to participate in the study were living in Denmark on 1<sup>st</sup> January, 2012 (baseline). Of 100,000 adults (≥20 years) randomly selected from the general Danish population, 95,253 were eligible and invited to participate (Figure 1). Of these, 49,706 (52.2%) completed the study questionnaire (Supplementary File 1).(15)”</i>                                                                                                                                                                                                                                                                                                                                                                                                                                                                                             |
| Quantitative variables       | 11 | Explain how quantitative variables were handled in the analyses. If applicable, describe which groupings were chosen and why                                                                                                                                                                                                                                                                                                                                                                                                                                                                                                                                                                                                                                                                                                                              |
|                              |    | <i>Please see Table 1 for baseline information.</i>                                                                                                                                                                                                                                                                                                                                                                                                                                                                                                                                                                                                                                                                                                                                                                                                       |
|                              |    | <i>We had four quantitative variables: age, income, assets, and alcohol consumption. Income and assets were divided into quartiles.</i>                                                                                                                                                                                                                                                                                                                                                                                                                                                                                                                                                                                                                                                                                                                   |
|                              |    | <i>Age was divided into four groups, younger and older adults in the working age and younger and older among the retired adults.</i>                                                                                                                                                                                                                                                                                                                                                                                                                                                                                                                                                                                                                                                                                                                      |
|                              |    | <i>Alcohol was divided in moderate and high drinking for men and women.</i>                                                                                                                                                                                                                                                                                                                                                                                                                                                                                                                                                                                                                                                                                                                                                                               |



|    |                     |     |                                                                                                                                                                                                                                                                                                                                  |
|----|---------------------|-----|----------------------------------------------------------------------------------------------------------------------------------------------------------------------------------------------------------------------------------------------------------------------------------------------------------------------------------|
| 1  | Statistical methods | 12  | (a) Describe all statistical methods, including those used to control for confounding                                                                                                                                                                                                                                            |
| 2  |                     |     | (b) Describe any methods used to examine subgroups and interactions                                                                                                                                                                                                                                                              |
| 3  |                     |     | (c) Explain how missing data were addressed                                                                                                                                                                                                                                                                                      |
| 4  |                     |     | (d) If applicable, explain how loss to follow-up was addressed                                                                                                                                                                                                                                                                   |
| 5  |                     |     | (e) Describe any sensitivity analyses                                                                                                                                                                                                                                                                                            |
| 6  |                     |     |                                                                                                                                                                                                                                                                                                                                  |
| 7  |                     |     |                                                                                                                                                                                                                                                                                                                                  |
| 8  |                     |     | <i>Please see page 7, the section “Statistical analysis”</i>                                                                                                                                                                                                                                                                     |
| 9  |                     |     | <i>Please also see page 5 the section “Symptom data”</i>                                                                                                                                                                                                                                                                         |
| 10 |                     |     |                                                                                                                                                                                                                                                                                                                                  |
| 11 |                     |     |                                                                                                                                                                                                                                                                                                                                  |
| 12 |                     |     |                                                                                                                                                                                                                                                                                                                                  |
| 13 | <b>Results</b>      |     |                                                                                                                                                                                                                                                                                                                                  |
| 14 | Participants        | 13* | (a) Report numbers of individuals at each stage of study—eg numbers potentially eligible, examined for eligibility, confirmed eligible, included in the study, completing follow-up, and analysed                                                                                                                                |
| 15 |                     |     | (b) Give reasons for non-participation at each stage                                                                                                                                                                                                                                                                             |
| 16 |                     |     | (c) Consider use of a flow diagram                                                                                                                                                                                                                                                                                               |
| 17 |                     |     |                                                                                                                                                                                                                                                                                                                                  |
| 18 |                     |     | <i>Please see the “Result” section (page 8) and Figure 1.</i>                                                                                                                                                                                                                                                                    |
| 19 |                     |     |                                                                                                                                                                                                                                                                                                                                  |
| 20 |                     |     |                                                                                                                                                                                                                                                                                                                                  |
| 21 |                     |     |                                                                                                                                                                                                                                                                                                                                  |
| 22 |                     |     |                                                                                                                                                                                                                                                                                                                                  |
| 23 |                     |     |                                                                                                                                                                                                                                                                                                                                  |
| 24 |                     |     |                                                                                                                                                                                                                                                                                                                                  |
| 25 | Descriptive data    | 14* | (a) Give characteristics of study participants (eg demographic, clinical, social) and information on exposures and potential confounders                                                                                                                                                                                         |
| 26 |                     |     | (b) Indicate number of participants with missing data for each variable of interest                                                                                                                                                                                                                                              |
| 27 |                     |     | (c) Summarise follow-up time (eg, average and total amount)                                                                                                                                                                                                                                                                      |
| 28 |                     |     |                                                                                                                                                                                                                                                                                                                                  |
| 29 |                     |     |                                                                                                                                                                                                                                                                                                                                  |
| 30 |                     |     |                                                                                                                                                                                                                                                                                                                                  |
| 31 |                     |     | <i>(a) Please see Table 1.</i>                                                                                                                                                                                                                                                                                                   |
| 32 |                     |     | <i>(b) See the section “Symptom data” page 5.</i>                                                                                                                                                                                                                                                                                |
| 33 |                     |     | <i>(c) Not done</i>                                                                                                                                                                                                                                                                                                              |
| 34 |                     |     |                                                                                                                                                                                                                                                                                                                                  |
| 35 |                     |     |                                                                                                                                                                                                                                                                                                                                  |
| 36 |                     |     |                                                                                                                                                                                                                                                                                                                                  |
| 37 | Outcome data        | 15* | Report numbers of outcome events or summary measures over time                                                                                                                                                                                                                                                                   |
| 38 |                     |     | <i>Please see Table 2, Supplementary file 4 and Supplementary Table A.</i>                                                                                                                                                                                                                                                       |
| 39 |                     |     |                                                                                                                                                                                                                                                                                                                                  |
| 40 |                     |     |                                                                                                                                                                                                                                                                                                                                  |
| 41 | Main results        | 16  | (a) Give unadjusted estimates and, if applicable, confounder-adjusted estimates and their precision (eg, 95% confidence interval). Make clear which confounders were adjusted for and why they were included                                                                                                                     |
| 42 |                     |     |                                                                                                                                                                                                                                                                                                                                  |
| 43 |                     |     |                                                                                                                                                                                                                                                                                                                                  |
| 44 |                     |     |                                                                                                                                                                                                                                                                                                                                  |
| 45 |                     |     | <i>We adjusted for age, sex, socioeconomic status (highest completed education, income, assets, and work status), urbanization degree, cohabitation status, smoking and alcohol. They were included because we believe they can affect the relation between diagnoses and symptoms, as well as how symptoms are interpreted.</i> |
| 46 |                     |     | <i>Please see Table 1, Figure 2, 3 and 4, and Supplementary Tables A-G.</i>                                                                                                                                                                                                                                                      |
| 47 |                     |     |                                                                                                                                                                                                                                                                                                                                  |
| 48 |                     |     | (b) Report category boundaries when continuous variables were categorized                                                                                                                                                                                                                                                        |
| 49 |                     |     |                                                                                                                                                                                                                                                                                                                                  |
| 50 |                     |     |                                                                                                                                                                                                                                                                                                                                  |
| 51 |                     |     | <i>(b) Please see Table 1</i>                                                                                                                                                                                                                                                                                                    |
| 52 |                     |     | (c) If relevant, consider translating estimates of relative risk into absolute risk for a meaningful time period                                                                                                                                                                                                                 |
| 53 |                     |     |                                                                                                                                                                                                                                                                                                                                  |
| 54 |                     |     | <i>(c) Not done</i>                                                                                                                                                                                                                                                                                                              |
| 55 |                     |     |                                                                                                                                                                                                                                                                                                                                  |
| 56 | Other analyses      | 17  | Report other analyses done—eg analyses of subgroups and interactions, and sensitivity analyses                                                                                                                                                                                                                                   |
| 57 |                     |     | <i>Please see page 7 “Statistical analyses”</i>                                                                                                                                                                                                                                                                                  |
| 58 |                     |     |                                                                                                                                                                                                                                                                                                                                  |
| 59 |                     |     |                                                                                                                                                                                                                                                                                                                                  |
| 60 |                     |     |                                                                                                                                                                                                                                                                                                                                  |

---



---

|                                                                         |    |                                                                                                                                                                                             |
|-------------------------------------------------------------------------|----|---------------------------------------------------------------------------------------------------------------------------------------------------------------------------------------------|
| <b>Discussion</b> <i>Please see the discussion section, page 14-17.</i> |    |                                                                                                                                                                                             |
| Key results                                                             | 18 | Summarise key results with reference to study objectives                                                                                                                                    |
| Limitations                                                             | 19 | Discuss limitations of the study, taking into account sources of potential bias or imprecision. Discuss both direction and magnitude of any potential bias                                  |
| Interpretation                                                          | 20 | Give a cautious overall interpretation of results considering objectives, limitations, multiplicity of analyses, results from similar studies, and other relevant evidence                  |
| Generalisability                                                        | 21 | Discuss the generalisability (external validity) of the study results                                                                                                                       |
| <b>Other information</b>                                                |    |                                                                                                                                                                                             |
| Funding                                                                 | 22 | Give the source of funding and the role of the funders for the present study and, if applicable, for the original study on which the present article is based<br><i>Please see page 18.</i> |

---

\*Give information separately for exposed and unexposed groups.

**Note:** An Explanation and Elaboration article discusses each checklist item and gives methodological background and published examples of transparent reporting. The STROBE checklist is best used in conjunction with this article (freely available on the Web sites of PLoS Medicine at <http://www.plosmedicine.org/>, Annals of Internal Medicine at <http://www.annals.org/>, and Epidemiology at <http://www.epidem.com/>). Information on the STROBE Initiative is available at <http://www.strobe-statement.org>.
