# Supplementary material for: Symptom burden in multimorbidity: a population-based combined questionnaire and registry study from Denmark
Source: PubMed Central journal article supplement — BMJ Open. 2021 Apr 13;11(4):e041877. doi: 10.1136/bmjopen-2020-041877 (PMC8051398; doi:10.1136/bmjopen-2020-041877), 2021-04-13
Supplement: bmjopen-2020-041877supp002.pdf [file bmjopen-2020-041877supp002.pdf]

**Supplementary File 2****List of the 36 symptoms from The Danish Symptom Cohort included in this study.**

| <b>Symptoms</b>                 |                                    |
|---------------------------------|------------------------------------|
| Tiredness                       | Swollen legs                       |
| Night-time urination            | Difficulty in emptying the bladder |
| Lack of energy                  | Frequent urination                 |
| Headache                        | Stress incontinence                |
| Back pain                       | Shortness of breath                |
| Abdominal bloating              | Hoarseness                         |
| Memory problems                 | Urge incontinence                  |
| Abdominal pain                  | Loss of appetite                   |
| Coughing                        | Blood in stool/rectal bleeding     |
| Concentration problems          | Fever                              |
| Change in stool texture         | Difficulty swallowing              |
| Dizziness                       | Weight loss                        |
| Feeling unwell                  | Incontinence without stress/urge   |
| Constipation                    | Pain/burning when urinating        |
| Increase in waist circumference | Lump/swollen lymph node            |
| Change in stool frequency       | Black stool                        |
| Diarrhoea                       | Repeated vomiting                  |
| Nausea                          | Blood in urine                     |
