# Supplementary material for: Symptom burden in multimorbidity: a population-based combined questionnaire and registry study from Denmark
Source: PubMed Central journal article supplement — BMJ Open. 2021 Apr 13;11(4):e041877. doi: 10.1136/bmjopen-2020-041877 (PMC8051398; doi:10.1136/bmjopen-2020-041877), 2021-04-13
Supplement: bmjopen-2020-041877supp004.pdf [file bmjopen-2020-041877supp004.pdf]

Supplementary File 4 Prevalence of symptoms for the ten morbidity domains and for the group without diagnoses.

| Symptom                 | Total |       | No diagnosis |      | LUNG |      | MUSKULO SKELETAL |      | ENDO |      | MENTAL HEALTH |      | CANCER |      | NEURO |      | GASTRO |      | HEART |      | KIDNEY |      | SENSORY |      |
|-------------------------|-------|-------|--------------|------|------|------|------------------|------|------|------|---------------|------|--------|------|-------|------|--------|------|-------|------|--------|------|---------|------|
|                         | N     | %     | N            | %    | N    | %    | N                | %    | N    | %    | N             | %    | N      | %    | N     | %    | N      | %    | N     | %    | N      | %    | N       | %    |
| Total                   | 47452 | 100.0 | 30225        | 63.7 | 1595 | 3.4  | 6957             | 14.7 | 2214 | 4.7  | 471           | 1.0  | 2457   | 5.2  | 1679  | 3.5  | 2202   | 4.6  | 3878  | 8.2  | 1067   | 2.3  | 2614    | 5.5  |
| No symptom              | 4224  | 8.9   | 2990         | 9.9  | 72   | 4.5  | 475              | 6.8  | 136  | 6.1  | 27            | 5.7  | 195    | 7.9  | 93    | 5.5  | 104    | 4.7  | 281   | 7.2  | 68     | 6.4  | 209     | 8.0  |
| Tiredness               | 23252 | 49.0  | 14598        | 48.3 | 914  | 57.3 | 3422             | 49.2 | 1211 | 54.7 | 271           | 57.5 | 1226   | 49.9 | 965   | 57.5 | 1294   | 58.8 | 1896  | 48.9 | 632    | 59.2 | 1155    | 44.2 |
| Night-time urination    | 23122 | 48.7  | 13136        | 43.5 | 919  | 57.6 | 4126             | 59.3 | 1353 | 61.1 | 291           | 61.8 | 1408   | 57.3 | 991   | 59.0 | 1265   | 57.4 | 2520  | 65.0 | 588    | 55.1 | 1646    | 63.0 |
| Lack of energy          | 17623 | 37.1  | 10962        | 36.3 | 744  | 46.6 | 2671             | 38.4 | 888  | 40.1 | 229           | 48.6 | 943    | 38.4 | 728   | 43.4 | 1013   | 46.0 | 1477  | 38.1 | 483    | 45.3 | 894     | 34.2 |
| Headache                | 16969 | 35.8  | 11294        | 37.4 | 558  | 35.0 | 2316             | 33.3 | 667  | 30.1 | 149           | 31.6 | 736    | 30.0 | 651   | 38.8 | 942    | 42.8 | 986   | 25.4 | 447    | 41.9 | 624     | 23.9 |
| Back pain               | 15200 | 32.0  | 8689         | 28.7 | 617  | 38.7 | 3256             | 46.8 | 791  | 35.7 | 189           | 40.1 | 758    | 30.9 | 575   | 34.2 | 949    | 43.1 | 1373  | 35.4 | 444    | 41.6 | 900     | 34.4 |
| Abdominal bloating      | 13951 | 29.4  | 8886         | 29.4 | 540  | 33.9 | 2024             | 29.1 | 662  | 29.9 | 112           | 23.8 | 665    | 27.1 | 507   | 30.2 | 931    | 42.3 | 1022  | 26.4 | 385    | 36.1 | 626     | 23.9 |
| Memory problems         | 9365  | 19.7  | 5254         | 17.4 | 440  | 27.6 | 1639             | 23.6 | 533  | 24.1 | 186           | 39.5 | 578    | 23.5 | 566   | 33.7 | 644    | 29.2 | 912   | 23.5 | 300    | 28.1 | 656     | 25.1 |
| Abdominal pain          | 9189  | 19.4  | 5491         | 18.2 | 395  | 24.8 | 1487             | 21.4 | 455  | 20.6 | 107           | 22.7 | 500    | 20.4 | 382   | 22.8 | 825    | 37.5 | 724   | 18.7 | 292    | 27.4 | 453     | 17.3 |
| Coughing                | 8396  | 17.7  | 5033         | 16.7 | 598  | 37.5 | 1341             | 19.3 | 442  | 20.0 | 145           | 30.8 | 422    | 17.2 | 343   | 20.4 | 478    | 21.7 | 757   | 19.5 | 233    | 21.8 | 471     | 18.0 |
| Concentration problems  | 8154  | 17.2  | 4940         | 16.3 | 339  | 21.3 | 1263             | 18.2 | 417  | 18.8 | 165           | 35.0 | 455    | 18.5 | 454   | 27.0 | 563    | 25.6 | 636   | 16.4 | 245    | 23.0 | 412     | 15.8 |
| Change in stool texture | 8055  | 17.0  | 4900         | 16.2 | 341  | 21.4 | 1257             | 18.1 | 414  | 18.7 | 105           | 22.3 | 418    | 17.0 | 323   | 19.2 | 565    | 25.7 | 687   | 17.7 | 240    | 22.5 | 427     | 16.3 |
| Dizziness               | 7476  | 15.8  | 4138         | 13.7 | 355  | 22.3 | 1313             | 18.9 | 476  | 21.5 | 116           | 24.6 | 426    | 17.3 | 459   | 27.3 | 521    | 23.7 | 877   | 22.6 | 242    | 22.7 | 560     | 21.4 |
| Feeling unwell          | 6903  | 14.6  | 4240         | 14.0 | 333  | 20.9 | 1065             | 15.3 | 387  | 17.5 | 92            | 19.5 | 350    | 14.2 | 303   | 18.0 | 503    | 22.8 | 547   | 14.1 | 214    | 20.1 | 332     | 12.7 |
| Constipation            | 6847  | 14.4  | 3891         | 12.9 | 277  | 17.4 | 1207             | 17.3 | 389  | 17.6 | 78            | 16.6 | 426    | 17.3 | 352   | 21.0 | 449    | 20.4 | 695   | 17.9 | 256    | 24.0 | 402     | 15.4 |

|                                    |      |      |      |      |     |      |      |      |     |      |     |      |     |      |     |      |     |      |     |      |     |      |     |      |
|------------------------------------|------|------|------|------|-----|------|------|------|-----|------|-----|------|-----|------|-----|------|-----|------|-----|------|-----|------|-----|------|
| Increase in waist circumference    | 6223 | 13.1 | 3774 | 12.5 | 279 | 17.5 | 985  | 14.2 | 295 | 13.3 | 70  | 14.9 | 308 | 12.5 | 238 | 14.2 | 428 | 19.4 | 514 | 13.3 | 212 | 19.9 | 320 | 12.2 |
| Change in stool frequency          | 6107 | 12.9 | 3634 | 12.0 | 262 | 16.4 | 999  | 14.4 | 345 | 15.6 | 74  | 15.7 | 349 | 14.2 | 247 | 14.7 | 444 | 20.2 | 542 | 14.0 | 189 | 17.7 | 357 | 13.7 |
| Diarrhoea                          | 6020 | 12.7 | 3700 | 12.2 | 276 | 17.3 | 925  | 13.3 | 316 | 14.3 | 77  | 16.3 | 320 | 13.0 | 225 | 13.4 | 502 | 22.8 | 464 | 12.0 | 171 | 16.0 | 260 | 9.9  |
| Nausea                             | 5884 | 12.4 | 3509 | 11.6 | 269 | 16.9 | 941  | 13.5 | 334 | 15.1 | 92  | 19.5 | 350 | 14.2 | 280 | 16.7 | 446 | 20.3 | 480 | 12.4 | 212 | 19.9 | 258 | 9.9  |
| Swollen legs                       | 5852 | 12.3 | 2634 | 8.7  | 369 | 23.1 | 1481 | 21.3 | 530 | 23.9 | 89  | 18.9 | 456 | 18.6 | 344 | 20.5 | 405 | 18.4 | 913 | 23.5 | 275 | 25.8 | 498 | 19.1 |
| Difficulty in emptying the bladder | 5542 | 11.7 | 2765 | 9.1  | 292 | 18.3 | 1146 | 16.5 | 358 | 16.2 | 102 | 21.7 | 361 | 14.7 | 347 | 20.7 | 408 | 18.5 | 751 | 19.4 | 216 | 20.2 | 505 | 19.3 |
| Frequent urination                 | 4972 | 10.5 | 2641 | 8.7  | 228 | 14.3 | 970  | 13.9 | 327 | 14.8 | 106 | 22.5 | 342 | 13.9 | 298 | 17.7 | 325 | 14.8 | 632 | 16.3 | 162 | 15.2 | 398 | 15.2 |
| Stress incontinence                | 4639 | 9.8  | 2511 | 8.3  | 253 | 15.9 | 991  | 14.2 | 298 | 13.5 | 50  | 10.6 | 350 | 14.2 | 200 | 11.9 | 297 | 13.5 | 415 | 10.7 | 279 | 26.1 | 312 | 11.9 |
| Shortness of breath                | 3782 | 8.0  | 1670 | 5.5  | 659 | 41.3 | 861  | 12.4 | 264 | 11.9 | 105 | 22.3 | 214 | 8.7  | 218 | 13.0 | 304 | 13.8 | 641 | 16.5 | 140 | 13.1 | 323 | 12.4 |
| Hoarseness                         | 3630 | 7.7  | 2000 | 6.6  | 291 | 18.2 | 630  | 9.1  | 231 | 10.4 | 59  | 12.5 | 220 | 9.0  | 196 | 11.7 | 236 | 10.7 | 417 | 10.8 | 124 | 11.6 | 264 | 10.1 |
| Urge incontinence                  | 2976 | 6.3  | 1296 | 4.3  | 162 | 10.2 | 766  | 11.0 | 234 | 10.6 | 61  | 13.0 | 227 | 9.2  | 219 | 13.0 | 216 | 9.8  | 454 | 11.7 | 193 | 18.1 | 331 | 12.7 |
| Loss of appetite                   | 2902 | 6.1  | 1609 | 5.3  | 182 | 11.4 | 513  | 7.4  | 190 | 8.6  | 95  | 20.2 | 201 | 8.2  | 192 | 11.4 | 247 | 11.2 | 288 | 7.4  | 92  | 8.6  | 174 | 6.7  |
| Blood in stool/rectal bleeding     | 2141 | 4.5  | 1343 | 4.4  | 89  | 5.6  | 300  | 4.3  | 93  | 4.2  | 26  | 5.5  | 105 | 4.3  | 87  | 5.2  | 160 | 7.3  | 183 | 4.7  | 58  | 5.4  | 114 | 4.4  |
| Fever                              | 1805 | 3.8  | 1184 | 3.9  | 76  | 4.8  | 258  | 3.7  | 80  | 3.6  | 20  | 4.2  | 81  | 3.3  | 65  | 3.9  | 108 | 4.9  | 115 | 3.0  | 48  | 4.5  | 80  | 3.1  |
| Difficulty swallowing              | 1665 | 3.5  | 843  | 2.8  | 111 | 7.0  | 321  | 4.6  | 122 | 5.5  | 36  | 7.6  | 117 | 4.8  | 123 | 7.3  | 156 | 7.1  | 207 | 5.3  | 66  | 6.2  | 124 | 4.7  |
| Weight loss                        | 1405 | 3.0  | 734  | 2.4  | 83  | 5.2  | 279  | 4.0  | 99  | 4.5  | 39  | 8.3  | 112 | 4.6  | 107 | 6.4  | 125 | 5.7  | 167 | 4.3  | 41  | 3.8  | 90  | 3.4  |
| Incontinence without               | 1136 | 2.4  | 441  | 1.5  | 74  | 4.6  | 293  | 4.2  | 92  | 4.2  | 37  | 7.9  | 111 | 4.5  | 88  | 5.2  | 110 | 5.0  | 165 | 4.3  | 137 | 12.8 | 141 | 5.4  |

|                             |     |     |     |     |    |     |     |     |    |     |      |      |     |     |     |     |     |     |     |     |      |      |     |     |
|-----------------------------|-----|-----|-----|-----|----|-----|-----|-----|----|-----|------|------|-----|-----|-----|-----|-----|-----|-----|-----|------|------|-----|-----|
| stress/urge                 |     |     |     |     |    |     |     |     |    |     |      |      |     |     |     |     |     |     |     |     |      |      |     |     |
| Pain/burning when urinating | 971 | 2.0 | 483 | 1.6 | 48 | 3.0 | 211 | 3.0 | 71 | 3.2 | 10   | 2.1  | 83  | 3.4 | 55  | 3.3 | 86  | 3.9 | 118 | 3.0 | 54   | 5.1  | 76  | 2.9 |
| Lump/swollen lymph node     | 753 | 1.6 | 456 | 1.5 | 35 | 2.2 | 117 | 1.7 | 39 | 1.8 | 12   | 2.5  | 63  | 2.6 | 26  | 1.5 | 47  | 2.1 | 58  | 1.5 | 29   | 2.7  | 30  | 1.1 |
| Black stool                 | 725 | 1.5 | 421 | 1.4 | 46 | 2.9 | 111 | 1.6 | 48 | 2.2 | 16   | 3.4  | 39  | 1.6 | 33  | 2.0 | 58  | 2.6 | 69  | 1.8 | 15   | 1.4  | 47  | 1.8 |
| Repeated vomiting           | 586 | 1.2 | 316 | 1.0 | 34 | 2.1 | 115 | 1.7 | 46 | 2.1 | 27   | 5.7  | 41  | 1.7 | 34  | 2.0 | 54  | 2.5 | 53  | 1.4 | 29   | 2.7  | 32  | 1.2 |
| Blood in urine              | 264 | 0.6 | 117 | 0.4 | 16 | 1.0 | 70  | 1.0 | 19 | 0.9 | 4    | 0.8  | 17  | 0.7 | 18  | 1.1 | 14  | 0.6 | 47  | 1.2 | 22   | 2.1  | 21  | 0.8 |
| Coughing up blood           | 58  | 0.1 | 35  | 0.1 | 6  | 0.4 | 8   | 0.1 | 4  | 0.2 | none | none | few |     | few |     | few |     | 6   | 0.2 | few  | 0    | 4   | 0.2 |
| Blood in vomit              | 47  | 0.1 | 27  | 0.1 | 4  | 0.3 | 10  | 0.1 | 6  | 0.3 | few  |      | few |     | few |     | 7   | 0.3 | 5   | 0.1 | none | none | few |     |

LUNG = lung diagnoses, MUSCULOSKELETAL = musculoskeletal diagnoses, ENDO = endocrine diagnoses, MENTAL HEALTH = mental health diagnoses, CANCER = cancer diagnoses, NEURO = neurological diagnoses, GASTRO = gastrointestinal diagnoses, HEART = cardiovascular diagnoses, KIDNEY = genitourinary diagnoses, SENSORY = sensory organ diagnoses
