# Supplementary material for: Symptom burden in multimorbidity: a population-based combined questionnaire and registry study from Denmark
Source: PubMed Central journal article supplement — BMJ Open. 2021 Apr 13;11(4):e041877. doi: 10.1136/bmjopen-2020-041877 (PMC8051398; doi:10.1136/bmjopen-2020-041877), 2021-04-13
Supplement: bmjopen-2020-041877supp005.pdf [file bmjopen-2020-041877supp005.pdf]

**Supplementary Table A.** Mean number of symptoms for each morbidity domain with number of symptoms, interference with usual daily activities and concern of the symptoms.

|                     | Number of symptoms<br>(mean number) | Interference with usual<br>daily activities<br>(mean impairment<br>score) <sup>α</sup> | Concern about<br>symptoms<br>(mean worry score) <sup>×</sup> |
|---------------------|-------------------------------------|----------------------------------------------------------------------------------------|--------------------------------------------------------------|
| LUNG                | 7.3                                 | 2.6                                                                                    | 2.0                                                          |
| MUSCULOSKELETAL     | 6.0                                 | 2.3                                                                                    | 1.7                                                          |
| ENDO                | 6.1                                 | 2.3                                                                                    | 1.7                                                          |
| MENTAL HEALTH       | 7.4                                 | 2.8                                                                                    | 2.2                                                          |
| CANCER              | 5.6                                 | 2.1                                                                                    | 1.5                                                          |
| NEURO               | 6.8                                 | 2.4                                                                                    | 1.8                                                          |
| GASTRO              | 7.4                                 | 2.5                                                                                    | 1.9                                                          |
| HEART               | 5.9                                 | 2.2                                                                                    | 1.7                                                          |
| KIDNEY              | 7.3                                 | 2.5                                                                                    | 1.9                                                          |
| SENSORY             | 5.5                                 | 2.1                                                                                    | 1.3                                                          |
| <b>No diagnosis</b> | 4.8                                 | 1.7                                                                                    | 1.2                                                          |
| <b>Total</b>        | 5.2                                 | 1.9                                                                                    | 1.3                                                          |

LUNG = lung diagnoses. MUSCULOSKELETAL = musculoskeletal diagnoses. ENDO = endocrine diagnoses. MENTAL HEALTH = psychiatric diagnoses. CANCER = cancer diagnoses. NEURO = neurological diagnoses. GASTRO = gastrointestinal diagnoses. HEART = cardiovascular diagnoses. KIDNEY = genitourinary diagnoses. SENSORY = sensory organ diagnoses.

<sup>α</sup> Mean activity score. Derived from the question: 'within the last 4 weeks: to what extent did you experience that the following symptoms or discomfort interfered your usual daily activities?' with the following response categories: not at all, slightly, moderate, quite a bit, extremely. The response categories were transformed in to a numeric 4 digit scale where e.g. 4 is worse than 2.

<sup>×</sup> Mean worry score. Derived from the question: 'within the last 4 weeks: to what extent were you concerned about the following symptoms or discomfort?' with the following response categories: not at all, slightly, moderate, quite a bit, extremely. The response categories were transformed in to a numeric 4 digit scale where e.g. 4 is worse than 2.
