# Supplementary material for: Symptom burden in multimorbidity: a population-based combined questionnaire and registry study from Denmark
Source: PubMed Central journal article supplement — BMJ Open. 2021 Apr 13;11(4):e041877. doi: 10.1136/bmjopen-2020-041877 (PMC8051398; doi:10.1136/bmjopen-2020-041877), 2021-04-13
Supplement: bmjopen-2020-041877supp006.pdf [file bmjopen-2020-041877supp006.pdf]

**Supplementary Table B.** Mean difference in number of symptoms (with 95%CI) for the respondents having the indicated combination of morbidity domains relative to the respondent having no morbidity.

|                  | LUNG                  | MUSCULO SKELETAL      | ENDO                  | MENTAL HEALTH          | CANCER                 | NEURO                  | GASTRO                | HEART                 | KIDNEY                  | SENSORY                |
|------------------|-----------------------|-----------------------|-----------------------|------------------------|------------------------|------------------------|-----------------------|-----------------------|-------------------------|------------------------|
| LUNG             | 1.88<br>(1.57 ; 2.18) | 2.00<br>(1.43 ; 2.57) | 2.03<br>(0.69 ; 3.37) | 7.42<br>(4.99 ; 9.85)  | 1.00<br>(-0.45 ; 2.45) | 2.94<br>(1.34 ; 4.54)  | 2.94<br>(1.89 ; 3.98) | 2.82<br>(2.03 ; 3.61) | 2.97<br>(0.91 ; 5.02)   | 2.70<br>(1.49 ; 3.92)  |
| MUSCULO SKELETAL |                       | 0.81<br>(0.67 ; 0.94) | 1.29<br>(0.76 ; 1.81) | 3.05<br>(1.64 ; 4.45)  | 1.01<br>(0.52 ; 1.5)   | 1.84<br>(1.22 ; 2.45)  | 2.94<br>(2.47 ; 3.41) | 2.00<br>(1.63 ; 2.38) | 2.93<br>(2.16 ; 3.70)   | 1.44<br>(1.03 ; 1.84)  |
| ENDO             |                       |                       | 0.65<br>(0.38 ; 0.91) | 0.46<br>(-1.46 ; 2.38) | 0.86<br>(-0.13 ; 1.84) | 2.36<br>(1.21 ; 3.51)  | 1.92<br>(0.90 ; 2.93) | 1.63<br>(1.10 ; 2.17) | 1.58<br>(0.20 ; 2.96)   | 0.77<br>(-0.22 ; 1.76) |
| MENTAL HEALTH    |                       |                       |                       | 2.02<br>(1.41 ; 2.63)  | 3.90<br>(1.47 ; 6.33)  | 1.08<br>(-0.73 ; 2.89) | 2.58<br>(1.15 ; 4.01) | 2.46<br>(0.78 ; 4.14) | 1.89<br>(-2.54 ; 6.33)  | 3.42<br>(0.29 ; 6.56)  |
| CANCER           |                       |                       |                       |                        | 0.36<br>(0.14 ; 0.59)  | 1.70<br>(0.79 ; 2.62)  | 2.70<br>(1.68 ; 3.71) | 2.15<br>(1.50 ; 2.8)  | -0.59<br>(-1.94 ; 0.77) | 2.15<br>(1.33 ; 2.97)  |
| NEURO            |                       |                       |                       |                        |                        | 1.08<br>(0.78 ; 1.38)  | 2.55<br>(1.28 ; 3.81) | 2.12<br>(1.37 ; 2.86) | 2.95<br>(1.41 ; 4.48)   | 1.44<br>(0.36 ; 2.52)  |
| GASTRO           |                       |                       |                       |                        |                        |                        | 1.96<br>(1.71 ; 2.21) | 2.50<br>(1.76 ; 3.23) | 4.44<br>(3.19 ; 5.68)   | 1.60<br>(0.48 ; 2.72)  |
| HEART            |                       |                       |                       |                        |                        |                        |                       | 0.89<br>(0.68 ; 1.09) | 1.57<br>(0.60 ; 2.53)   | 1.07<br>(0.49 ; 1.65)  |
| KIDNEY           |                       |                       |                       |                        |                        |                        |                       |                       | 1.83<br>(1.47 ; 2.19)   | 3.05<br>(1.44 ; 4.65)  |
| SENSORY          |                       |                       |                       |                        |                        |                        |                       |                       |                         | 0.71<br>(0.47 ; 0.94)  |
