# Supplementary material for: Symptom burden in multimorbidity: a population-based combined questionnaire and registry study from Denmark
Source: PubMed Central journal article supplement — BMJ Open. 2021 Apr 13;11(4):e041877. doi: 10.1136/bmjopen-2020-041877 (PMC8051398; doi:10.1136/bmjopen-2020-041877), 2021-04-13
Supplement: bmjopen-2020-041877supp007.pdf [file bmjopen-2020-041877supp007.pdf]

**Supplementary Table C.** Excess mean number of symptoms (with 95%CI) for the respondents having the indicated combination of morbidity domains relative to the added mean number of symptoms from two respondents having each morbidity of the combination separately.

|                  | LUNG | MUSCULO SKELETAL         | ENDO                    | MENTAL HEALTH            | CANCER                  | NEURO                    | GASTRO                  | HEART                   | KIDNEY                   | SENSORY                 |
|------------------|------|--------------------------|-------------------------|--------------------------|-------------------------|--------------------------|-------------------------|-------------------------|--------------------------|-------------------------|
| LUNG             |      | -0.68<br>(-1.35 ; -0.02) | -0.50<br>(-1.89 ; 0.9)  | 3.52<br>(1.00 ; 6.05)    | -1.24<br>(-2.74 ; 0.26) | -0.02<br>(-1.67 ; 1.64)  | -0.90<br>(-2.02 ; 0.22) | 0.06<br>(-0.81 ; 0.93)  | -0.74<br>(-2.85 ; 1.37)  | 0.12<br>(-1.16 ; 1.40)  |
| MUSCULO SKELETAL |      |                          | -0.17<br>(-0.77 ; 0.43) | 0.22<br>(-1.32 ; 1.75)   | -0.16<br>(-0.71 ; 0.39) | -0.05<br>(-0.75 ; 0.64)  | 0.17<br>(-0.38 ; 0.72)  | 0.31<br>(-0.14 ; 0.76)  | 0.29<br>(-0.57 ; 1.15)   | -0.08<br>(-0.56 ; 0.41) |
| ENDO             |      |                          |                         | -2.21<br>(-4.24 ; -0.18) | -0.16<br>(-1.20 ; 0.89) | 0.63<br>(-0.58 ; 1.85)   | -0.69<br>(-1.77 ; 0.39) | 0.10<br>(-0.53 ; 0.73)  | -0.90<br>(-2.35 ; 0.56)  | -0.59<br>(-1.63 ; 0.46) |
| MENTAL HEALTH    |      |                          |                         |                          | 1.51<br>(-1.00 ; 4.03)  | -2.02<br>(-3.96 ; -0.09) | -1.40<br>(-2.97 ; 0.17) | -0.45<br>(-2.24 ; 1.35) | -1.96<br>(-6.45 ; 2.53)  | 0.69<br>(-2.51 ; 3.90)  |
| CANCER           |      |                          |                         |                          |                         | 0.26<br>(-0.73 ; 1.24)   | 0.37<br>(-0.70 ; 1.44)  | 0.90<br>(0.18 ; 1.62)   | -2.78<br>(-4.20 ; -1.36) | 1.08<br>(0.19 ; 1.96)   |
| NEURO            |      |                          |                         |                          |                         |                          | -0.50<br>(-1.82 ; 0.83) | 0.15<br>(-0.68 ; 0.98)  | 0.03<br>(-1.57 ; 1.64)   | -0.35<br>(-1.49 ; 0.79) |
| GASTRO           |      |                          |                         |                          |                         |                          |                         | -0.35<br>(-1.15 ; 0.46) | 0.65<br>(-0.68 ; 1.97)   | -1.07<br>(-2.24 ; 0.10) |
| HEART            |      |                          |                         |                          |                         |                          |                         |                         | -1.15<br>(-2.20 ; -0.10) | -0.52<br>(-1.18 ; 0.13) |
| KIDNEY           |      |                          |                         |                          |                         |                          |                         |                         |                          | 0.51<br>(-1.15 ; 2.17)  |
| SENSORY          |      |                          |                         |                          |                         |                          |                         |                         |                          |                         |
