# Supplementary material for: Symptom burden in multimorbidity: a population-based combined questionnaire and registry study from Denmark
Source: PubMed Central journal article supplement — BMJ Open. 2021 Apr 13;11(4):e041877. doi: 10.1136/bmjopen-2020-041877 (PMC8051398; doi:10.1136/bmjopen-2020-041877), 2021-04-13
Supplement: bmjopen-2020-041877supp008.pdf [file bmjopen-2020-041877supp008.pdf]

**Supplementary Table D.** Mean difference in impairment score (with 95%CI) for the respondents having the indicated combination of morbidity domains relative to the respondent having no morbidity.

|                  | LUNG                  | MUSCULO SKELETAL      | ENDO                  | MENTAL HEALTH          | CANCER                 | NEURO                 | GASTRO                | HEART                 | KIDNEY                 | SENSORY               |
|------------------|-----------------------|-----------------------|-----------------------|------------------------|------------------------|-----------------------|-----------------------|-----------------------|------------------------|-----------------------|
| LUNG             | 0.54<br>(0.44 ; 0.64) | 0.84<br>(0.66 ; 1.03) | 0.70<br>(0.27 ; 1.13) | 1.02<br>(0.24 ; 1.81)  | 0.61<br>(0.13 ; 1.08)  | 0.87<br>(0.36 ; 1.39) | 0.65<br>(0.32 ; 0.99) | 0.77<br>(0.51 ; 1.02) | 0.54<br>(-0.13 ; 1.20) | 0.80<br>(0.40 ; 1.21) |
| MUSCULO SKELETAL |                       | 0.37<br>(0.32 ; 0.41) | 0.45<br>(0.28 ; 0.62) | 1.11<br>(0.66 ; 1.56)  | 0.39<br>(0.23 ; 0.55)  | 0.54<br>(0.34 ; 0.74) | 0.73<br>(0.58 ; 0.89) | 0.66<br>(0.54 ; 0.78) | 0.99<br>(0.74 ; 1.24)  | 0.63<br>(0.50 ; 0.76) |
| ENDO             |                       |                       | 0.23<br>(0.14 ; 0.32) | 0.51<br>(-0.13 ; 1.15) | 0.24<br>(-0.08 ; 0.55) | 0.88<br>(0.51 ; 1.25) | 0.44<br>(0.11 ; 0.77) | 0.56<br>(0.39 ; 0.73) | 0.27<br>(-0.18 ; 0.71) | 0.59<br>(0.27 ; 0.91) |
| MENTAL HEALTH    |                       |                       |                       | 0.75<br>(0.56 ; 0.95)  | 1.07<br>(0.28 ; 1.85)  | 0.75<br>(0.15 ; 1.35) | 0.94<br>(0.48 ; 1.40) | 1.01<br>(0.47 ; 1.55) | 1.43<br>(0.00 ; 2.86)  | 1.69<br>(0.59 ; 2.80) |
| CANCER           |                       |                       |                       |                        | 0.15<br>(0.08 ; 0.23)  | 0.58<br>(0.29 ; 0.88) | 0.68<br>(0.35 ; 1.01) | 0.53<br>(0.32 ; 0.74) | 0.04<br>(-0.40 ; 0.48) | 0.74<br>(0.47 ; 1.01) |
| NEURO            |                       |                       |                       |                        |                        | 0.38<br>(0.28 ; 0.48) | 0.61<br>(0.20 ; 1.02) | 0.77<br>(0.53 ; 1.01) | 0.50<br>(-0.01 ; 1.02) | 0.58<br>(0.23 ; 0.93) |
| GASTRO           |                       |                       |                       |                        |                        |                       | 0.49<br>(0.41 ; 0.57) | 0.60<br>(0.36 ; 0.84) | 0.80<br>(0.40 ; 1.21)  | 0.70<br>(0.33 ; 1.06) |
| HEART            |                       |                       |                       |                        |                        |                       |                       | 0.25<br>(0.19 ; 0.32) | 0.34<br>(0.03 ; 0.66)  | 0.33<br>(0.14 ; 0.52) |
| KIDNEY           |                       |                       |                       |                        |                        |                       |                       |                       | 0.49<br>(0.37 ; 0.61)  | 1.03<br>(0.50 ; 1.56) |
| SENSORY          |                       |                       |                       |                        |                        |                       |                       |                       |                        | 0.26<br>(0.19 ; 0.34) |
|                  |                       |                       |                       |                        |                        |                       |                       |                       | 0 (0 ; 0)              |                       |
