# Supplementary material for: Symptom burden in multimorbidity: a population-based combined questionnaire and registry study from Denmark
Source: PubMed Central journal article supplement — BMJ Open. 2021 Apr 13;11(4):e041877. doi: 10.1136/bmjopen-2020-041877 (PMC8051398; doi:10.1136/bmjopen-2020-041877), 2021-04-13
Supplement: bmjopen-2020-041877supp009.pdf [file bmjopen-2020-041877supp009.pdf]

**Supplementary Table E.** Excess mean impairment score (with 95%CI) for the respondents having the indicated combination of morbidity domains relative to the added mean impairment score from two respondents having each morbidity of the combination separately.

|                     | LUNG | MUSCULO<br>SKELETAL     | ENDO                    | MENTAL<br>HEALTH        | CANCER                  | NEURO                   | GASTRO                   | HEART                   | KIDNEY                   | SENSORY                 |
|---------------------|------|-------------------------|-------------------------|-------------------------|-------------------------|-------------------------|--------------------------|-------------------------|--------------------------|-------------------------|
| LUNG                |      | -0.07<br>(-0.28 ; 0.15) | -0.07<br>(-0.53 ; 0.38) | -0.28<br>(-1.09 ; 0.54) | -0.09<br>(-0.58 ; 0.40) | -0.05<br>(-0.59 ; 0.48) | -0.38<br>(-0.74 ; -0.02) | -0.03<br>(-0.31 ; 0.25) | -0.49<br>(-1.18 ; 0.19)  | 0.00<br>(-0.43 ; 0.43)  |
| MUSCULO<br>SKELETAL |      |                         | -0.14<br>(-0.34 ; 0.05) | -0.01<br>(-0.50 ; 0.49) | -0.13<br>(-0.31 ; 0.05) | -0.20<br>(-0.43 ; 0.02) | -0.12<br>(-0.30 ; 0.06)  | 0.04<br>(-0.10 ; 0.19)  | 0.14<br>(-0.14 ; 0.42)   | 0.00<br>(-0.16 ; 0.16)  |
| ENDO                |      |                         |                         | -0.47<br>(-1.14 ; 0.21) | -0.15<br>(-0.49 ; 0.19) | 0.27<br>(-0.12 ; 0.66)  | -0.28<br>(-0.63 ; 0.07)  | 0.08<br>(-0.13 ; 0.28)  | -0.45<br>(-0.92 ; 0.02)  | 0.10<br>(-0.24 ; 0.44)  |
| MENTAL<br>HEALTH    |      |                         |                         |                         | 0.16<br>(-0.65 ; 0.97)  | -0.38<br>(-1.02 ; 0.26) | -0.30<br>(-0.81 ; 0.21)  | 0.01<br>(-0.57 ; 0.59)  | 0.19<br>(-1.26 ; 1.64)   | 0.68<br>(-0.45 ; 1.81)  |
| CANCER              |      |                         |                         |                         |                         | 0.05<br>(-0.27 ; 0.37)  | 0.03<br>(-0.31 ; 0.38)   | 0.13<br>(-0.10 ; 0.36)  | -0.60<br>(-1.06 ; -0.14) | 0.32<br>(0.04 ; 0.61)   |
| NEURO               |      |                         |                         |                         |                         |                         | -0.26<br>(-0.68 ; 0.17)  | 0.14<br>(-0.13 ; 0.41)  | -0.36<br>(-0.90 ; 0.18)  | -0.06<br>(-0.43 ; 0.31) |
| GASTRO              |      |                         |                         |                         |                         |                         |                          | -0.14<br>(-0.40 ; 0.12) | -0.18<br>(-0.60 ; 0.25)  | -0.05<br>(-0.44 ; 0.33) |
| HEART               |      |                         |                         |                         |                         |                         |                          |                         | -0.40<br>(-0.74 ; -0.05) | -0.18<br>(-0.39 ; 0.03) |
| KIDNEY              |      |                         |                         |                         |                         |                         |                          |                         |                          | 0.28<br>(-0.27 ; 0.83)  |
| SENSORY             |      |                         |                         |                         |                         |                         |                          |                         |                          |                         |
