# Supplementary material for: Symptom burden in multimorbidity: a population-based combined questionnaire and registry study from Denmark
Source: PubMed Central journal article supplement — BMJ Open. 2021 Apr 13;11(4):e041877. doi: 10.1136/bmjopen-2020-041877 (PMC8051398; doi:10.1136/bmjopen-2020-041877), 2021-04-13
Supplement: bmjopen-2020-041877supp010.pdf [file bmjopen-2020-041877supp010.pdf]

**Supplementary Table F.** Mean difference in worry score (with 95%CI) for the respondents having the indicated combination of morbidity domains relative to the respondent having no morbidity.

|                  | LUNG                  | MUSCULO SKELETAL      | ENDO                  | MENTAL HEALTH          | CANCER                 | NEURO                 | GASTRO                | HEART                 | KIDNEY                  | SENSORY               |
|------------------|-----------------------|-----------------------|-----------------------|------------------------|------------------------|-----------------------|-----------------------|-----------------------|-------------------------|-----------------------|
| LUNG             | 0.52<br>(0.42 ; 0.62) | 0.65<br>(0.46 ; 0.83) | 0.91<br>(0.47 ; 1.34) | 0.95<br>(0.16 ; 1.74)  | 0.53<br>(0.05 ; 1.01)  | 0.93<br>(0.41 ; 1.45) | 0.65<br>(0.31 ; 0.99) | 0.79<br>(0.53 ; 1.04) | 0.19<br>(-0.47 ; 0.86)  | 0.94<br>(0.52 ; 1.36) |
| MUSCULO SKELETAL |                       | 0.36<br>(0.32 ; 0.4)  | 0.41<br>(0.24 ; 0.58) | 1.19<br>(0.73 ; 1.64)  | 0.40<br>(0.24 ; 0.56)  | 0.47<br>(0.27 ; 0.67) | 0.71<br>(0.56 ; 0.87) | 0.74<br>(0.62 ; 0.87) | 0.89<br>(0.64 ; 1.14)   | 0.60<br>(0.47 ; 0.73) |
| ENDO             |                       |                       | 0.22<br>(0.14 ; 0.31) | 0.41<br>(-0.23 ; 1.06) | 0.15<br>(-0.17 ; 0.47) | 0.89<br>(0.52 ; 1.26) | 0.41<br>(0.07 ; 0.75) | 0.45<br>(0.28 ; 0.63) | 0.08<br>(-0.37 ; 0.53)  | 0.59<br>(0.27 ; 0.91) |
| MENTAL HEALTH    |                       |                       |                       | 0.67<br>(0.47 ; 0.87)  | 1.68<br>(0.90 ; 2.47)  | 0.73<br>(0.12 ; 1.33) | 1.14<br>(0.68 ; 1.60) | 0.86<br>(0.32 ; 1.41) | 1.31<br>(-0.13 ; 2.75)  | 1.13<br>(0.02 ; 2.25) |
| CANCER           |                       |                       |                       |                        | 0.08<br>(0.01 ; 0.16)  | 0.74<br>(0.44 ; 1.04) | 0.42<br>(0.09 ; 0.75) | 0.50<br>(0.29 ; 0.72) | -0.02<br>(-0.46 ; 0.42) | 0.72<br>(0.45 ; 0.99) |
| NEURO            |                       |                       |                       |                        |                        | 0.29<br>(0.19 ; 0.39) | 0.51<br>(0.10 ; 0.92) | 0.64<br>(0.39 ; 0.88) | 0.16<br>(-0.37 ; 0.69)  | 0.54<br>(0.19 ; 0.89) |
| GASTRO           |                       |                       |                       |                        |                        |                       | 0.46<br>(0.37 ; 0.54) | 0.51<br>(0.26 ; 0.75) | 0.71<br>(0.30 ; 1.12)   | 0.59<br>(0.22 ; 0.96) |
| HEART            |                       |                       |                       |                        |                        |                       |                       | 0.25<br>(0.18 ; 0.31) | 0.19<br>(-0.13 ; 0.51)  | 0.38<br>(0.19 ; 0.57) |
| KIDNEY           |                       |                       |                       |                        |                        |                       |                       |                       | 0.46<br>(0.34 ; 0.58)   | 0.71<br>(0.17 ; 1.24) |
| SENSORY          |                       |                       |                       |                        |                        |                       |                       |                       |                         | 0.28<br>(0.20 ; 0.36) |
