# Supplementary material for: Symptom burden in multimorbidity: a population-based combined questionnaire and registry study from Denmark
Source: PubMed Central journal article supplement — BMJ Open. 2021 Apr 13;11(4):e041877. doi: 10.1136/bmjopen-2020-041877 (PMC8051398; doi:10.1136/bmjopen-2020-041877), 2021-04-13
Supplement: bmjopen-2020-041877supp011.pdf [file bmjopen-2020-041877supp011.pdf]

**Supplementary Table G.** Excess mean worry score (with 95%CI) for the respondents having the indicated combination of morbidity domains relative to the added mean worry score from two respondents having each morbidity of the combination separately.

|                  | LUNG | MUSCULO SKELETAL         | ENDO                    | MENTAL HEALTH           | CANCER                  | NEURO                   | GASTRO                  | HEART                   | KIDNEY                   | SENSORY                 |
|------------------|------|--------------------------|-------------------------|-------------------------|-------------------------|-------------------------|-------------------------|-------------------------|--------------------------|-------------------------|
| LUNG             |      | -0.24<br>(-0.46 ; -0.02) | 0.16<br>(-0.30 ; 0.61)  | -0.24<br>(-1.06 ; 0.58) | -0.08<br>(-0.58 ; 0.42) | 0.12<br>(-0.42 ; 0.65)  | -0.33<br>(-0.69 ; 0.03) | 0.02<br>(-0.27 ; 0.30)  | -0.79<br>(-1.48 ; -0.11) | 0.13<br>(-0.30 ; 0.57)  |
| MUSCULO SKELETAL |      |                          | -0.18<br>(-0.38 ; 0.02) | 0.16<br>(-0.34 ; 0.66)  | -0.05<br>(-0.23 ; 0.13) | -0.18<br>(-0.41 ; 0.05) | -0.11<br>(-0.29 ; 0.07) | 0.13<br>(-0.01 ; 0.28)  | 0.06<br>(-0.22 ; 0.34)   | -0.04<br>(-0.20 ; 0.12) |
| ENDO             |      |                          |                         | -0.48<br>(-1.16 ; 0.20) | -0.16<br>(-0.50 ; 0.18) | 0.37<br>(-0.02 ; 0.77)  | -0.27<br>(-0.63 ; 0.09) | -0.02<br>(-0.23 ; 0.19) | -0.61<br>(-1.08 ; -0.14) | 0.09<br>(-0.25 ; 0.43)  |
| MENTAL HEALTH    |      |                          |                         |                         | 0.93<br>(0.11 ; 1.75)   | -0.23<br>(-0.87 ; 0.42) | 0.02<br>(-0.50 ; 0.53)  | -0.06<br>(-0.64 ; 0.53) | 0.18<br>(-1.28 ; 1.64)   | 0.18<br>(-0.95 ; 1.32)  |
| CANCER           |      |                          |                         |                         |                         | 0.37<br>(0.04 ; 0.69)   | -0.12<br>(-0.47 ; 0.23) | 0.17<br>(-0.06 ; 0.41)  | -0.57<br>(-1.03 ; -0.10) | 0.35<br>(0.06 ; 0.64)   |
| NEURO            |      |                          |                         |                         |                         |                         | -0.23<br>(-0.66 ; 0.20) | 0.10<br>(-0.17 ; 0.37)  | -0.59<br>(-1.15 ; -0.04) | -0.03<br>(-0.41 ; 0.34) |
| GASTRO           |      |                          |                         |                         |                         |                         |                         | -0.20<br>(-0.46 ; 0.07) | -0.21<br>(-0.64 ; 0.22)  | -0.15<br>(-0.53 ; 0.24) |
| HEART            |      |                          |                         |                         |                         |                         |                         |                         | -0.52<br>(-0.87 ; -0.17) | -0.15<br>(-0.36 ; 0.07) |
| KIDNEY           |      |                          |                         |                         |                         |                         |                         |                         |                          | -0.04<br>(-0.59 ; 0.51) |
| SENSORY          |      |                          |                         |                         |                         |                         |                         |                         |                          |                         |
